# Supplementary material for: Identification of the Arabidopsis REDUCED DORMANCY 2 Gene Uncovers a Role for the Polymerase Associated Factor 1 Complex in Seed Dormancy
Source: PLoS One. 2011 Jul 25;6(7):e22241. doi: 10.1371/journal.pone.0022241 (PMC3143138; doi:10.1371/journal.pone.0022241)
Supplement: Dataset S1 — Differentially expressed genes in the hub1-2 and rdo2-1 mutants. (XLS) [file pone.0022241.s003.xls]

## Sheet: rdo2-1_DOWN
Differentially downregulated genes in rdo2-1 compared to Ler
See manuscript text for details
Affymetrix					Ler	Ler	rdo2-1	rdo2-1
probe identifier	Gene anotation	AGI code	P-value	False Discovery Rate	Average signal	STDEV	Average signal	STDEV
260719_at	C2 domain-containing protein	AT1G48090	1.822e-09	5.444e-06	495.22	118.867	86.9034	29.2717
250476_at	MADS-box protein flowering locus F (FLF)	AT5G10140	9.706e-09	1.424e-05	224.595	16.3281	58.8364	5.94392
251453_at	lactose permease-related	AT3G60070	9.719e-09	1.424e-05	71.2893	3.62301	18.415	0.569757
253907_at	dihydroflavonol 4-reductase family / dihydrokaempferol 4-reductase family	AT4G27250	1.083e-08	1.424e-05	115.093	14.6942	24.4512	9.91412
267389_at	glycosyl hydrolase family 1 protein	AT2G44460	9.422e-08	7.48e-05	2286.3	502.73	864.226	183.447
253805_at	expressed protein	AT4G28260	1.001e-07	7.48e-05	921.677	150.28	278.716	108.131
247956_at	FAD-binding domain-containing protein / cytokinin oxidase family protein	AT5G56970	1.171e-07	8.229e-05	43.547	10.4375	12.8052	0.426135
263322_at	glycoside hydrolase starch-binding domain-containing protein	AT2G04270	1.415e-07	9.394e-05	12.4358	0.639262	5.65753	0.638153
248213_at	expressed protein	AT5G53660	2.076e-07	0.0001181	414.643	88.4679	142.377	27.9474
265042_at	acid phosphatase class B family protein	AT1G04040	3.115e-07	0.0001542	59.1866	12.2709	18.7555	2.0474
264354_s_at	expressed protein	AT1G03200 : AT1G03240	3.355e-07	0.0001542	114.567	15.0659	26.5586	17.2097
259399_at	expressed protein	AT1G17710	3.962e-07	0.0001754	189.217	167.001	10.9432	3.18596
246925_at	cytochrome P450 71B14, putative (CYP71B14)	AT5G25180	4.375e-07	0.0001769	1432.08	116.811	646.719	138.354
264355_at	phenazine biosynthesis PhzC/PhzF family protein	AT1G03210	4.394e-07	0.0001769	79.7364	18.4116	22.0482	7.66626
250207_at	chalcone synthase / naringenin-chalcone synthase	AT5G13930	4.572e-07	0.0001769	350.244	250.378	27.9061	27.1948
262292_at	expressed protein	AT1G27595	5.652e-07	0.000193	20.5085	7.1147	6.32997	1.27646
266222_at	expressed protein	AT2G28780	6.842e-07	0.0002044	53.9037	5.15986	16.5083	4.6794
265201_at	expressed protein	AT2G36810	7.522e-07	0.0002192	216.749	51.2314	59.8402	24.1148
262589_s_at	MATE efflux family protein	AT1G15150 : AT1G15160	8.646e-07	0.0002328	92.1958	7.26296	27.7184	11.1508
248283_at	pyruvate kinase, putative	AT5G52920	8.766e-07	0.0002328	345.484	14.0647	134.097	19.9746
253522_at	ChaC-like family protein	AT4G31290	9.264e-07	0.0002355	2396.71	328.561	1183.56	97.7832
264078_at	beta-galactosidase, putative / lactase, putative	AT2G28470	1e-06	0.0002439	107.129	22.1968	35.2068	8.44587
262177_at	isochorismate synthase 1 (ICS1) / isochorismate mutase	AT1G74710	1.25e-06	0.0002818	477.292	119.112	178.489	24.6564
258602_at	protein phosphatase 2C family protein / PP2C family protein	AT3G02750	1.277e-06	0.0002827	288.382	25.0238	103.3	10.516
246786_at	aminotransferase class IV family protein	AT5G27410	1.446e-06	0.0003065	104.168	5.46815	35.045	8.75602
250272_at	glycosyl transferase family 48 protein	AT5G13000	1.455e-06	0.0003065	303.324	56.3552	104.726	28.902
247668_at	pseudo-response regulator 3 (APRR3)	AT5G60100	1.462e-06	0.0003065	137.648	26.8641	49.7378	2.22301
245891_at	amino acid permease 2 (AAP2)	AT5G09220	1.63e-06	0.0003263	830.455	222.366	227.107	141.905
264835_at	secretory carrier membrane protein (SCAMP) family protein	AT1G03550	1.74e-06	0.0003409	76.5628	14.9022	25.842	2.07554
252123_at	naringenin 3-dioxygenase / flavanone 3-hydroxylase (F3H)	AT3G51240	1.949e-06	0.0003696	541.508	231.419	132.792	68.5421
246432_at	gibberellin response modulator, putative / gibberellin-responsive modulator, putative	AT5G17490	2.225e-06	0.0004091	135.647	20.0666	46.3004	2.86012
247640_at	F-box family protein	AT5G60610	2.702e-06	0.0004688	42.1012	9.52017	14.9408	2.28977
250438_at	expressed protein	AT5G10580	2.707e-06	0.0004688	830.045	207.813	320.289	108.205
247564_at	DEAD box RNA helicase, putative	AT5G61140	2.773e-06	0.0004701	191.113	38.8032	68.4633	18.3469
265658_at	aminotransferase class I and II family protein	AT2G13810	2.793e-06	0.0004701	1913.59	338.157	972.541	132.711
265814_at	FAT domain-containing protein / phosphatidylinositol 3- and 4-kinase family protein	AT2G17930	3.455e-06	0.000558	281.619	71.9381	89.7513	26.3044
263136_at	alpha, alpha-trehalose-phosphate synthase, UDP-forming, putative / trehalose-6-phosphate synthase, putative / UDP-glucose-glucosephosphate glucosyltransferase, putative	AT1G78580	3.941e-06	0.0005952	191.075	14.5461	77.3186	20.303
249215_at	dihydroflavonol 4-reductase (dihydrokaempferol 4-reductase) (DFR)	AT5G42800	4.239e-06	0.0006254	698.404	241.057	202.031	145.472
259971_at	SPL1-Related3 protein (SPL1R3)	AT1G76580	4.588e-06	0.0006687	98.5095	43.5274	27.7058	4.27645
266022_at	subtilase family protein	AT2G05920	5.16e-06	0.0007169	730.838	16.9747	342.458	81.039
254203_at	expressed protein	AT4G24150	5.361e-06	0.0007198	206.141	45.4103	79.1747	3.20134
256305_at	glutathione S-conjugate ABC transporter (MRP1)	AT1G30400	5.632e-06	0.0007431	38.8767	17.6539	10.9269	2.91258
251257_at	ADP-ribosylation factor	AT3G62290	5.667e-06	0.0007431	3420.5	224.92	2030.3	143.65
254283_s_at	leucoanthocyanidin dioxygenase, putative / anthocyanidin synthase, putative	AT4G22870 : AT4G22880	6.045e-06	0.0007768	436.203	258.889	84.0276	58.0733
246403_at	pectinacetylesterase, putative	AT1G57590	6.448e-06	0.0008111	170.77	71.233	53.1385	5.37365
250905_at	protein kinase family protein	AT5G03640	6.555e-06	0.0008118	27.3278	6.88027	11.1047	0.815731
253496_at	glutathione peroxidase, putative	AT4G31870	6.98e-06	0.0008233	219.549	89.7384	77.1451	20.731
260546_at	trypsin inhibitor, putative	AT2G43520	7.112e-06	0.0008251	2484.87	232.401	1340.43	265.543
261845_at	NRAMP metal ion transporter 6, putative (NRAMP6)	AT1G15950 : AT1G15960	7.826e-06	0.0008804	1148.21	68.4183	627.709	68.3571
252940_at	leucine-rich repeat transmembrane protein kinase, putative	AT4G39270	9.554e-06	0.001002	77.4209	24.8888	27.3576	5.23234
248970_at	sodium:solute symporter family protein	AT5G45380	1.004e-05	0.001043	32.43	7.89269	12.9084	1.88392
260412_at	alpha-amylase, putative / 1,4-alpha-D-glucan glucanohydrolase, putative	AT1G69830	1.123e-05	0.001118	21.1352	2.16715	9.68901	1.75716
246293_at	sigA-binding protein	AT3G56710	1.162e-05	0.001147	44.2909	15.6	15.1484	3.07124
248086_at	expressed protein	AT5G55490	1.212e-05	0.001188	341.394	50.1642	137.979	35.2622
253090_at	beta-galactosidase, putative / lactase, putative	AT4G36360	1.224e-05	0.00119	3401.39	116.912	1954.76	449.599
265471_at	peroxidase 21 (PER21) (P21) (PRXR5)	AT2G37130	1.257e-05	0.001211	35.0275	11.4517	12.4528	3.43044
259918_at	ovule development protein, putative	AT1G72570	1.296e-05	0.00122	312.691	10.6018	115.182	52.9315
264893_at	C2 domain-containing protein	AT1G23140	1.367e-05	0.001277	129.659	95.6666	19.7267	3.80754
248540_at	ferric reductase-like transmembrane component family protein	AT5G50160	1.407e-05	0.001299	99.7489	33.1543	32.1323	12.1034
263192_at	acetyl-CoA carboxylase 1 (ACC1)	AT1G36160	1.414e-05	0.001299	252.473	96.8969	81.7532	24.1501
262090_at	histone acetyltransferase 4 (HAC4)	AT1G55970	1.471e-05	0.001323	11.9367	1.60771	6.40154	0.507962
254797_at	expressed protein	AT4G13030	1.533e-05	0.001368	912.421	37.4461	498.37	75.5156
255550_at	galactinol-raffinose galactosyltransferase, putative	AT4G01970	1.665e-05	0.001437	157.956	45.349	57.0336	23.9929
256252_at	UDP-glucoronosyl/UDP-glucosyl transferase family protein	AT3G11340	1.682e-05	0.001437	600.62	114.243	289.741	64.2466
267489_s_at	tRNA-splicing endonuclease positive effector-related	AT2G19120 : AT4G30100	1.824e-05	0.001513	293.58	79.4241	122.475	8.27677
264211_at	gigantea protein (GI)	AT1G22770	1.836e-05	0.001513	292.656	73.2173	112.594	44.2945
252350_at	ataxia-telangiectasia mutated protein (Atm)	AT3G48190	1.87e-05	0.00153	61.8073	13.9478	21.9221	8.1447
259990_s_at	F-box family protein (FKF1) / adagio 3 (ADO3)	AT1G68050 : AT5G23410 : AT5G42730	2.09e-05	0.001677	458.67	10.2205	235.192	15.6443
249115_at	pinhead protein (PINHEAD) / zwille protein (ZWILLE)	AT5G43810	2.157e-05	0.001702	10.9145	1.22731	6.00967	0.428778
245634_at	nodulin MtN21 family protein	AT1G25270	2.257e-05	0.001762	19.8704	2.38564	9.14888	1.92224
248817_at	glycine-rich protein	AT5G47020	2.279e-05	0.001762	18.729	1.99064	9.21723	1.90765
253088_at	cytochrome P450 84A1 (CYP84A1) / ferulate-5-hydroxylase (FAH1)	AT4G36220	2.385e-05	0.001815	899.818	90.547	464.446	122.381
263904_at	ABC transporter family protein	AT2G36380	2.433e-05	0.001826	235.828	75.1329	78.1294	42.0829
260248_at	heat shock protein 101 (HSP101)	AT1G74310	2.445e-05	0.001826	2379.23	480.843	1289.21	172.543
257708_at	expressed protein	AT3G13330	2.562e-05	0.001901	838.355	229.964	354.834	126.487
265900_at	expressed protein	AT2G25730	2.58e-05	0.001903	35.9329	4.12608	16.1979	4.2502
262745_at	lipase, putative	AT1G28600	2.675e-05	0.001949	1494.91	384.171	783.352	82.1901
263947_at	expressed protein	AT2G35820	2.74e-05	0.001972	31.0957	4.11185	13.4804	1.00303
246216_at	cytochrome P450 90C1 (CYP90C1) / rotundifolia3 (ROT3)	AT4G36380	2.785e-05	0.001981	391.808	133.381	159.345	5.9718
261936_at	hypothetical protein	AT1G22600	2.865e-05	0.002003	862.368	176.949	450.026	25.4765
253835_at	glycosyl hydrolase family 1 protein	AT4G27820	3.012e-05	0.002085	299.615	60.8008	128.479	45.6669
245415_at	agenet domain-containing protein	AT4G17330	3.03e-05	0.002085	750.818	104.126	333.411	122.079
261659_at	target of rapamycin protein (TOR)	AT1G50030	3.321e-05	0.002211	86.4046	21.8715	32.9821	14.2844
266858_at	DNAJ heat shock N-terminal domain-containing protein	AT2G26890	3.341e-05	0.002211	58.4537	11.1505	23.3564	9.2299
248911_at	expressed protein	AT5G45830	3.386e-05	0.002211	1193.09	298.994	610.548	96.0485
249678_at	protein kinase family protein	AT5G35980	3.488e-05	0.002241	171.118	46.975	67.4711	14.5307
246325_at	molybdenum cofactor sulfurase (LOS5) (ABA3)	AT1G16540	3.531e-05	0.002245	349.076	33.5379	174.027	35.623
246133_at	aldehyde oxidase 1 (AAO1)	AT5G20960	3.723e-05	0.002329	1860.23	453.069	954.935	245.934
254879_at	expressed protein	AT4G11670	3.759e-05	0.002339	82.2622	23.3705	31.2748	8.74056
252921_at	enhanced disease susceptibility 5 (EDS5) / salicylic acid induction deficient 1 (SID1)	AT4G39030	3.955e-05	0.002423	16.6339	3.13739	8.13942	2.46851
249791_at	amino acid transporter family protein	AT5G23810	4.054e-05	0.002457	69.479	11.3229	28.4265	5.37567
256959_at	expressed protein	AT3G13440	4.101e-05	0.002457	40.3977	11.7852	16.8031	3.93837
250661_at	aspartyl protease family protein	AT5G07030	4.102e-05	0.002457	26.4368	4.47302	11.9161	3.44497
248185_at	glycosyltransferase family protein	AT5G54060	4.111e-05	0.002457	91.5844	47.1979	22.4802	19.8429
250083_at	glutathione S-transferase, putative	AT5G17220	4.112e-05	0.002457	716.98	420.654	168.238	144.866
263156_at	GDSL-motif lipase, putative	AT1G54030	4.187e-05	0.00248	179.53	12.1091	83.4231	9.16475
252613_at	SIT4 phosphatase-associated family protein	AT3G45190	4.822e-05	0.002784	174.913	40.3969	72.8312	9.52922
259047_at	DegP protease, putative	AT3G03380	4.928e-05	0.002818	80.9562	34.2972	25.9739	9.73783
259764_at	regulatory protein (NPR1)	AT1G64280	4.979e-05	0.002833	58.8352	11.9329	24.2382	5.9847
250558_at	flavonoid 3'-monooxygenase / flavonoid 3'-hydroxylase (F3'H) / cytochrome P450 75B1 (CYP75B1) / transparent testa 7 protein (TT7)	AT5G07990	5.212e-05	0.002938	272.751	68.7781	114.399	24.7446
265455_at	transducin family protein / WD-40 repeat family protein	AT2G46560	5.36e-05	0.002999	44.2901	11.6961	17.5714	1.9132
258078_at	expressed protein	AT3G25870	5.394e-05	0.002999	1357.28	150.105	828.281	88.4782
252543_at	protein kinase / nonphototropic hypocotyl protein 1 (NPH1) / phototropin	AT3G45780	5.438e-05	0.003009	581.462	80.4889	303.769	85.4064
258485_at	acyl-(acyl-carrier-protein) desaturase, putative / stearoyl-ACP desaturase, putative	AT3G02630	5.725e-05	0.003138	150.381	9.66678	63.9637	21.0393
261032_at	hydrolase, alpha/beta fold family protein	AT1G17430	5.84e-05	0.003187	1260.86	93.2511	637.65	231.975
266797_at	expressed protein	AT2G22840	6.128e-05	0.003328	142.344	31.1536	59.9907	9.03274
257973_at	expressed protein	AT3G20720	6.443e-05	0.003464	52.4931	17.815	18.7177	6.60153
263912_at	1,4-alpha-glucan branching enzyme / starch branching enzyme class II (SBE2-1)	AT2G36390	6.49e-05	0.003464	16.6957	1.89071	9.35494	0.733376
251382_at	pectinesterase family protein	AT3G60730	6.871e-05	0.003623	2117.01	398.177	1218.67	237.078
247742_at	ceramidase family protein	AT5G58980	6.882e-05	0.003623	7.699	0.591377	4.78575	0.752912
256994_s_at	myrcene/ocimene synthase, putative	AT3G25820 : AT3G25830	7.024e-05	0.003656	690.923	110.401	319.903	110.829
249871_at	zinc finger (C3HC4-type RING finger) family protein	AT5G23110	7.037e-05	0.003656	21.0874	4.56222	9.98518	1.02254
248510_at	Mutator-like transposase family	AT5G50315	7.453e-05	0.003811	1296.39	148.959	791.668	70.3003
246273_at	cupin family protein	AT4G36700	7.535e-05	0.003811	2314.42	380.483	1400.11	194.673
263219_at	subtilase family protein	AT1G30600	7.619e-05	0.003811	11.005	1.2234	6.33801	0.939743
266964_at	ABC transporter family protein	AT2G39480	7.653e-05	0.003811	179.915	72.9408	62.2859	11.5265
245292_at	catalytic LigB subunit of aromatic ring-opening dioxygenase family	AT4G15093	7.832e-05	0.003852	589.945	39.574	320.611	12.0156
260097_at	sugar transporter family protein	AT1G73220	8.021e-05	0.003887	2085.26	293.374	1341.72	94.0648
262360_at	leucine-rich repeat transmembrane protein kinase, putative	AT1G73080	8.028e-05	0.003887	43.4002	12.193	18.931	1.28231
266028_at	pentatricopeptide (PPR) repeat-containing protein	AT2G06000	8.057e-05	0.003887	21.4815	3.40917	10.4189	2.48527
262734_at	GDSL-motif lipase, putative	AT1G28640	8.06e-05	0.003887	119.916	30.3433	51.1836	13.7758
250604_at	glycosyl hydrolase family 79 N-terminal domain-containing protein	AT5G07830	8.086e-05	0.003887	2070.53	174.909	1305.19	131.048
256814_at	glycosyl hydrolase family 1 protein	AT3G21370	8.099e-05	0.003887	14468.8	600.233	10687.1	1494.71
251144_at	transferase family protein	AT5G01210	9.004e-05	0.004253	90.0672	10.8639	39.8519	2.40553
265727_at	DNA topoisomerase family protein	AT2G32000	9.044e-05	0.004255	114.742	18.6315	54.2996	9.98156
262264_at	patched family protein	AT1G42470	9.155e-05	0.00429	518.168	88.4954	240.638	98.3846
254452_at	UV-damaged DNA-binding protein, putative	AT4G21100	9.205e-05	0.004297	28.4776	9.10102	12.5469	2.35547
259156_at	exocyst complex component-related	AT3G10380	9.92e-05	0.004559	366.753	115.242	169.06	43.648
249029_at	disease resistance protein (TIR-NBS-LRR class), putative	AT5G44870	9.992e-05	0.004575	19.5495	7.75946	8.3092	1.71881
257075_at	FF domain-containing protein / WW domain-containing protein	AT3G19670	0.0001003	0.004575	81.1149	13.5472	37.7784	6.72559
265567_at	pseudogene, glycine-rich protein	AT2G05580	0.0001023	0.004632	5654.48	2656.44	2414.73	468.947
265929_s_at	UDP-glucoronosyl/UDP-glucosyl transferase family protein	AT2G18560 : AT2G18570	0.0001023	0.004632	947.213	128.682	555.024	24.9787
258863_at	DEAD/DEAH box helicase carpel factory-related	AT3G03300	0.0001103	0.004938	18.7239	5.56141	8.97684	1.89488
253987_at	phosphofructokinase family protein	AT4G26270	0.0001118	0.004987	231.974	15.5615	116.492	10.8697
265305_at	tyrosine decarboxylase, putative	AT2G20340	0.0001167	0.005183	38.6801	26.8811	12.0918	2.6488
262290_at	hydroxyproline-rich glycoprotein family protein	AT1G70985	0.0001202	0.005284	1068	86.3448	603.009	184.603
257196_at	AMP-binding protein, putative	AT3G23790	0.0001214	0.005315	537.426	102.187	296.454	45.1581
249112_at	sulfate adenylyltransferase 4 / ATP-sulfurylase 4 (APS4)	AT5G43780	0.0001266	0.005499	1217.43	249.127	686.093	139.107
251402_at	oxidoreductase, 2OG-Fe(II) oxygenase family protein	AT3G60290	0.0001282	0.005529	418.012	23.9183	206.82	69.2703
253401_at	expressed protein	AT4G32870	0.0001293	0.005555	732.604	65.275	414.205	81.3007
253241_at	fatty acid elongase 1 (FAE1)	AT4G34520	0.0001297	0.005555	581.355	124.926	257.705	140.237
245487_at	phytochrome D (PHYD)	AT4G16250	0.0001318	0.005622	99.3927	48.3474	36.9595	6.28067
258107_at	MATE efflux family protein	AT3G23560	0.0001336	0.005641	303.565	7.23628	162.56	20.6065
262369_at	expressed protein	AT1G73010	0.0001439	0.00595	1985.78	399.791	1210.17	89.2655
260362_at	protein kinase family protein	AT1G70530	0.0001494	0.006135	426.323	51.3266	227.648	37.7416
255948_at	expressed protein	AT1G22060	0.0001504	0.006136	17.7542	2.09379	9.3032	2.30195
263123_at	pentacyclic triterpene synthase, putative	AT1G78500	0.0001521	0.006183	126.588	14.5221	59.5541	16.609
251675_at	transcriptional activator, putative	AT3G57300	0.0001558	0.006271	215.565	31.4274	103.595	17.5323
256808_at	expressed protein	AT3G21430	0.0001569	0.006271	211.741	14.6582	107.312	21.8169
254566_at	expressed protein	AT4G19240	0.0001574	0.006271	134.085	12.0114	63.9113	5.60162
260496_at	ABC transporter family protein	AT2G41700	0.0001602	0.006355	89.8895	26.4785	36.4649	13.5519
264902_at	expressed protein	AT1G23060	0.0001608	0.006355	55.1617	14.2826	22.9688	6.12138
263210_at	expressed protein	AT1G10585	0.0001657	0.00647	53.1451	12.8026	23.4433	7.97596
262580_at	CBS domain-containing protein	AT1G15330	0.0001671	0.006504	1339.03	204.979	733.953	240.538
245703_at	S-adenosyl-L-methionine:carboxyl methyltransferase family protein	AT5G04380	0.0001704	0.006589	777.738	96.1439	452.789	75.6472
264792_at	transcription factor jumonji (jmj) family protein / zinc finger (C5HC2 type) family protein	AT1G08620	0.0001715	0.00661	225.845	39.9137	105.533	27.2063
267001_at	urease accessory protein (UREG)	AT2G34470	0.0001727	0.006634	11.3008	1.69711	6.55856	1.02678
250355_at	glycine-rich protein	AT5G11700	0.0001762	0.006748	107.312	5.11973	55.3281	5.32214
253864_at	CBS domain-containing protein	AT4G27460	0.0001849	0.006992	412.633	42.4425	235.244	20.3286
261354_at	MutT/nudix family protein	AT1G79690	0.0001885	0.007039	986.717	108.575	543.415	189.583
248181_at	cytochrome c biogenesis protein family	AT5G54290	0.0001893	0.007041	740.592	64.528	442.606	33.4991
265416_at	DNA-binding S1FA family protein	AT2G37120	0.0001897	0.007041	193.348	33.8026	95.2289	24.5239
264815_at	phagocytosis and cell motility protein ELMO1-related	AT1G03620	0.0001913	0.007046	41.1725	4.49586	19.6206	1.98105
259596_at	auxin-responsive GH3 family protein	AT1G28130	0.0001921	0.007046	236.206	44.5214	118.276	15.9368
254822_at	ubiquitin-protein ligase, putative	AT4G12570	0.0001927	0.007046	132.455	28.1192	57.9067	19.3193
255226_at	UV-damaged DNA-binding protein, putative	AT4G05420	0.000197	0.007123	317.103	49.7335	160.108	30.7277
247540_at	AP2 domain-containing transcription factor family protein	AT5G61590	0.0001973	0.007123	987.224	54.8733	595.182	146.551
248773_at	kinesin-like protein (FRA1)	AT5G47820	0.0001983	0.007139	16.1679	2.87463	8.93223	0.464772
256323_at	expressed protein	AT1G54920	0.0002007	0.007179	27.1232	12.503	11.3418	1.46142
249092_at	glycoside hydrolase family 47 protein	AT5G43710	0.0002017	0.007195	75.8942	16.4447	33.8208	8.75501
247107_at	senescence-associated family protein	AT5G66040	0.0002027	0.007208	400.016	12.1239	232.449	12.0114
250827_at	cellulose synthase, catalytic subunit (Ath-B)	AT5G05170	0.0002037	0.007221	238.077	40.5457	115.409	44.8758
264508_at	phytochrome A (PHYA)	AT1G09570	0.0002105	0.007383	43.3995	13.0608	18.8481	5.52871
266109_at	mitochondrial substrate carrier family protein	AT2G37890	0.0002113	0.007383	9.20729	1.04381	5.91868	0.306981
260613_at	expressed protein	AT1G53380	0.0002157	0.007492	29.8795	2.23004	14.889	3.72311
259117_at	paired amphipathic helix repeat-containing protein	AT3G01320	0.0002227	0.007693	154.422	12.832	76.5862	22.9716
256199_at	SABRE, putative	AT1G58250	0.0002234	0.007694	51.7093	16.7165	21.5458	7.39849
256201_at	hypothetical protein	AT1G58230	0.0002259	0.007757	35.5184	9.59286	16.5906	4.49208
264777_at	L-allo-threonine aldolase-related	AT1G08630	0.000227	0.007772	103.675	14.0279	50.5406	11.6053
261013_at	expressed protein	AT1G26440	0.0002299	0.00783	67.4212	22.9885	28.3931	9.4929
254153_at	starch excess protein-related	AT4G24450	0.0002361	0.007957	97.7068	49.6415	32.0317	11.3271
263083_at	iron(III)-zinc(II) purple acid phosphatase (PAP12)	AT2G27190	0.0002401	0.008036	140.803	78.1625	41.6086	6.17823
261991_at	expressed protein	AT1G33700	0.0002419	0.008036	127.247	34.6516	49.7241	34.987
245774_at	TCP family transcription factor, putative	AT1G30210	0.0002434	0.008036	18.8076	1.78958	10.3169	1.85406
248552_at	31 kDa ribonucleoprotein, chloroplast, putative / RNA-binding protein RNP-T, putative / RNA-binding protein 1/2/3, putative / RNA-binding protein cp31, putative	AT5G50250	0.000247	0.008086	267.431	13.4892	140.005	25.0435
251870_at	early-responsive to dehydration protein-related / ERD protein-related	AT3G54510	0.0002507	0.008186	751.801	24.3204	469.784	80.6083
263483_at	heat shock protein, putative	AT2G04030	0.0002534	0.008252	742.424	46.804	402.21	129.939
249212_at	expressed protein	AT5G42690	0.0002558	0.008307	768.852	47.2095	445.417	122.195
245353_at	expressed protein	AT4G16000	0.0002591	0.008369	309.16	33.0122	160.442	26.9683
255527_at	expressed protein	AT4G02360	0.0002597	0.008369	94.7284	20.1385	39.5822	17.5338
249758_at	expressed protein	AT5G24350	0.0002598	0.008369	37.2333	12.954	16.7145	3.7771
245602_at	expressed protein	AT4G14270	0.0002607	0.008376	109.308	15.0791	53.0041	14.1475
256221_at	DNAJ heat shock N-terminal domain-containing protein	AT1G56300	0.0002666	0.008542	79.6275	10.1846	39.3191	8.54143
264263_at	SKP1 interacting partner 3-related	AT1G09155	0.0002724	0.008647	29.5391	5.32317	14.8527	3.5747
263961_at	F-box family protein (FBL11)	AT2G36370	0.0002738	0.008656	18.8796	1.31368	10.3307	1.81949
255009_at	KH domain-containing protein	AT4G10070	0.000275	0.008669	24.941	5.452	12.8977	3.09096
255281_at	callose synthase, putative / 1,3-beta-glucan synthase, putative	AT4G04970	0.0002801	0.008786	233.444	63.2541	107.21	23.9797
264335_s_at	ubiquitin-protein ligase 1 (UPL1)	AT1G55860 : AT1G70320	0.0002803	0.008786	1392.07	198.635	786.906	270.3
262281_at	proton-dependent oligopeptide transport (POT) family protein	AT1G68570	0.0002824	0.008812	1676.36	190.833	1100.87	69.8982
254564_at	9-cis-epoxycarotenoid dioxygenase, putative / neoxanthin cleavage enzyme, putative / carotenoid cleavage dioxygenase, putative	AT4G19170	0.0002836	0.008821	586.842	41.8366	327.97	91.1671
245624_at	UDP-glucoronosyl/UDP-glucosyl transferase family protein	AT4G14090	0.0002842	0.008821	268.436	162.925	67.363	70.269
248961_at	subtilase family protein	AT5G45650	0.0002883	0.00888	121.187	48.976	48.1815	15.9196
263829_at	expressed protein	AT2G40435	0.0002891	0.00888	16.0067	5.03609	7.98722	2.00144
249346_at	lysine and histidine specific transporter, putative	AT5G40780	0.000296	0.009047	430.983	87.0278	218.049	57.4695
256008_s_at	alliinase family protein	AT1G34040 : AT1G34060	0.0003048	0.009221	266.054	105.247	95.2069	61.1532
257033_at	peptidase M16 family protein / insulinase family protein	AT3G19170	0.000307	0.009228	1974.81	553.337	1057.84	260.968
251998_at	HECT-domain-containing protein / ubiquitin-transferase family protein / IQ calmodulin-binding motif-containing protein	AT3G53090	0.000309	0.009228	25.7614	2.38136	13.6053	2.22183
248916_at	leucine-rich repeat transmembrane protein kinase, putative	AT5G45840	0.0003091	0.009228	16.8862	4.24172	9.43075	1.26753
246810_at	hypothetical protein	AT1G43200 : AT1G43220 : AT4G07520 : AT4G08600 : AT5G27160	0.0003097	0.009228	248.03	76.8441	116.278	19.2214
261421_at	calmodulin-binding family protein	AT1G18840	0.0003118	0.009252	233.781	21.9551	106.022	56.9628
253649_at	expressed protein	AT4G29790	0.0003175	0.009323	76.2917	25.6795	33.1008	2.31787
262419_at	prolyl oligopeptidase family protein	AT1G50380	0.0003197	0.00934	752.065	118.618	452.896	54.3031
248271_at	expressed protein	AT5G53420	0.0003227	0.009407	156.603	56.1869	66.3578	23.7769
252886_at	cellulose synthase, catalytic subunit (Ath-A)	AT4G39350	0.000329	0.009538	38.7639	9.26541	18.2809	8.32342
258456_at	protein kinase family protein	AT3G22420	0.0003297	0.009538	44.7531	8.25699	20.2901	9.58906
266841_at	heat shock transcription factor family protein	AT2G26150	0.0003443	0.009915	91.6931	40.0475	34.6128	10.8309
261060_at	phosphoinositide phosphatase family protein	AT1G17340	0.0003475	0.009962	12.0886	3.52805	6.71263	0.203579
261055_at	aspartyl protease family protein	AT1G01300	0.0003476	0.009962	70.6503	3.81149	35.6518	4.61357

## Sheet: rdo2-1_UP
Differentially upregulated genes in rdo2-1 compared to Ler
See manuscript text for details
Affymetrix					Ler	Ler	rdo2-1	rdo2-1
probe identifier	Gene anotation	AGI code	P-value	False Discovery Rate	Average signal	STDEV	Average signal	STDEV
250281_at	expressed protein	AT5G13240	4.679e-12	5.591e-08	555.366	63.3075	2422.8	299.07
266172_at	aquaporin, putative	AT2G39010	7.512e-11	4.489e-07	18.7651	7.73819	137.43	17.3603
250798_at	peroxidase, putative	AT5G05340	2.27e-10	9.042e-07	10.4108	2.58256	102.63	50.7884
263927_s_at	mannitol dehydrogenase, putative	AT2G21730 : AT2G21890	3.956e-09	9.456e-06	65.384	10.4139	251.16	31.2398
265121_at	flavin-containing monooxygenase family protein / FMO family protein	AT1G62560	5.028e-09	1.001e-05	140.333	1.27364	571.637	139.613
260745_at	glutathione S-transferase, putative	AT1G78370	1.192e-08	1.424e-05	49.6838	18.0582	367.512	191.655
259723_at	metal transporter, putative (IRT3)	AT1G60960	2.347e-08	2.55e-05	108.482	9.24362	341.227	47.2577
264299_s_at	curculin-like (mannose-binding) lectin family protein	AT1G78850 : AT1G78860	3.051e-08	3.038e-05	20.3433	4.38106	77.6226	14.9485
265111_at	protease inhibitor/seed storage/lipid transfer protein (LTP) family protein	AT1G62510	3.94e-08	3.603e-05	949.305	181.318	2596.25	659.248
258639_at	polygalacturonase 3 (PGA3) / pectinase	AT3G07820	4.221e-08	3.603e-05	101.246	15.0561	472.509	197.981
265024_at	expressed protein	AT1G24600 : AT1G24610	1.991e-07	0.0001181	350.404	61.0581	814.777	41.0228
251524_at	aconitase C-terminal domain-containing protein	AT3G58990	1.999e-07	0.0001181	792.171	50.4475	1826.94	374.243
248163_at	auxin-responsive GH3 protein, putative (DFL-1)	AT5G54510	2.348e-07	0.0001276	94.0297	45.9853	360.929	55.0283
263477_at	UDP-glucoronosyl/UDP-glucosyl transferase family protein	AT2G31790	2.464e-07	0.000128	68.3905	5.86501	253.117	84.8791
247279_at	arabinogalactan-protein (AGP1)	AT5G64310	3.316e-07	0.0001542	219.593	55.8327	660.875	185.477
258851_at	glutathione S-transferase, putative	AT3G03190	4.868e-07	0.0001769	20.319	2.32155	94.9682	46.4495
259856_at	expressed protein	AT1G68440	4.875e-07	0.0001769	895.864	84.3536	1893.62	304
249375_at	arabinogalactan-protein (AGP24)	AT5G40730	4.886e-07	0.0001769	748.767	204.51	1664.21	97.5489
262603_at	lactoylglutathione lyase family protein / glyoxalase I family protein	AT1G15380	5.455e-07	0.0001917	696.579	131.449	1723.34	451.134
256109_at	expressed protein	AT1G16950	6.109e-07	0.0002028	202.833	16.8296	532.556	75.6717
263126_at	SOUL heme-binding family protein	AT1G78460	6.396e-07	0.0002044	13.7278	2.62357	47.3181	14.1421
260385_at	sulfotransferase family protein	AT1G74090	6.572e-07	0.0002044	1114.95	143.86	2241.07	314.774
257532_at	expressed protein	AT3G04700	6.767e-07	0.0002044	27.7543	3.62133	115.003	51.5223
266764_at	invertase/pectin methylesterase inhibitor family protein	AT2G47050	7.938e-07	0.0002259	38.5995	6.56734	240.789	147.639
259570_at	dehydrin (COR47)	AT1G20440	8.447e-07	0.0002328	21.2887	7.0359	73.9755	18.4008
262122_at	exopolygalacturonase / galacturan 1,4-alpha-galacturonidase (PGA3) / pectinase	AT1G02790	9.093e-07	0.0002355	62.2377	6.23761	290.567	148.745
265007_s_at	rapid alkalinization factor (RALF) family protein	AT1G61563 : AT1G61566	9.983e-07	0.0002439	611.503	128.461	1509.08	448.802
252291_s_at	peroxidase 33 (PER33) (P33) (PRXCA) / neutral peroxidase C (PERC)	AT3G49110 : AT3G49120	1.069e-06	0.0002554	56.2037	14.1922	176.069	35.0773
266326_at	cytochrome b5, putative	AT2G46650	1.223e-06	0.0002818	1023.24	259.852	2225.04	353.245
254862_at	bile acid:sodium symporter family protein	AT4G12030	1.234e-06	0.0002818	61.8317	7.32628	237.869	102.717
257674_at	endoribonuclease L-PSP family protein	AT3G20390	1.527e-06	0.0003147	139.743	39.1417	379.022	56.5003
257670_at	expressed protein	AT3G20340	1.638e-06	0.0003263	256.281	68.2139	663.989	127.721
256891_at	expressed protein	AT3G19030	1.77e-06	0.0003411	51.5983	13.191	170.466	58.2411
251722_at	amino acid transporter family protein	AT3G56200	2.032e-06	0.0003793	1357.53	216.298	2531.03	180.847
246246_at	pentatricopeptide (PPR) repeat-containing protein	AT4G37170	2.37e-06	0.0004291	11.1176	1.36141	33.9657	11.3968
266395_at	aconitase C-terminal domain-containing protein	AT2G43100	2.406e-06	0.0004291	729.106	128.666	1634.72	474.489
266750_s_at	pectinesterase family protein	AT2G47030 : AT2G47040	2.985e-06	0.0004954	100.694	21.5887	344.347	136.781
249429_at	expressed protein	AT5G39880	3.181e-06	0.0005207	40.4725	5.969	151.952	70.9634
251590_at	arabinogalactan-protein, putative (AGP23)	AT3G57690	3.533e-06	0.0005629	27.2732	3.68928	87.4279	35.7214
259015_at	expressed protein	AT3G07350	3.663e-06	0.000576	6.28211	1.32616	18.577	6.34265
263714_at	aminotransferase, putative	AT2G20610	3.733e-06	0.0005794	833.768	132.158	1554.89	134.551
259266_at	expressed protein	AT3G01240	3.921e-06	0.0005952	47.1564	6.09097	175.875	75.8289
248868_at	VQ motif-containing protein	AT5G46780	3.984e-06	0.0005952	88.105	11.5472	237.792	57.9656
251272_at	homeobox-leucine zipper protein 12 (HB-12) / HD-ZIP transcription factor 12	AT3G61890	4.935e-06	0.000703	1302.22	138.812	2355.39	341.219
257517_at	expressed protein	AT3G16330	4.992e-06	0.000703	26.3938	5.37224	70.9443	10.7092
261913_at	flavin-containing monooxygenase family protein / FMO family protein	AT1G65860	5e-06	0.000703	299.767	56.1259	719.764	146.835
256966_at	multi-copper oxidase type I family protein	AT3G13400	5.269e-06	0.0007198	51.7187	6.97099	216.546	107.164
247717_at	lipid transfer protein 3 (LTP3)	AT5G59320	5.36e-06	0.0007198	68.5986	69.6172	669.828	439.823
265170_at	carbonic anhydrase, putative / carbonate dehydratase, putative	AT1G23730	5.721e-06	0.0007431	9.78061	0.707598	37.1715	21.784
256349_at	late embryogenesis abundant protein-related / LEA protein-related	AT1G54890	6.348e-06	0.0008069	163.618	36.9085	394.384	55.1539
253305_at	L-galactose dehydrogenase (L-GalDH)	AT4G33666 : AT4G33670	6.678e-06	0.0008118	350.174	53.823	738.261	108.084
246841_at	germin-like protein, putative	AT5G26700	6.713e-06	0.0008118	19.6053	2.63602	73.9367	33.8426
261923_at	UDP-glucoronosyl/UDP-glucosyl transferase family protein	AT1G22380	6.733e-06	0.0008118	10.3085	4.17937	38.4829	21.5415
257435_at	splicing factor, putative	AT2G24590	6.793e-06	0.0008118	49.096	15.1268	146.575	14.7604
257121_at	auxin-responsive protein, putative	AT3G20220 : AT3G20230	7.027e-06	0.0008233	10.1683	1.18024	26.5886	6.80149
257715_at	zinc transporter (ZIP1)	AT3G12750	7.51e-06	0.0008558	28.4738	1.18592	92.8603	39.3065
257853_at	expressed protein	AT3G12960	7.52e-06	0.0008558	7064.9	136.368	10206.9	662.866
245982_at	nodulin MtN3 family protein	AT5G13170	7.883e-06	0.0008804	3261.05	704.616	5553.63	240.681
267055_at	prenylated rab acceptor (PRA1) family protein	AT2G38360	8.124e-06	0.0008989	146.921	11.512	335.204	25.4062
259269_at	pectate lyase family protein	AT3G01270	8.206e-06	0.0008997	38.9679	15.2354	143.298	67.4751
249497_at	hydrolase, alpha/beta fold family protein	AT5G39220	8.503e-06	0.0009237	1100.19	275.174	1999.49	123.572
250496_at	inorganic pyrophosphatase family protein	AT5G09650	8.671e-06	0.0009289	71.4895	29.0499	209.768	52.3121
249046_at	FAD-binding domain-containing protein	AT5G44400	8.706e-06	0.0009289	133.468	16.0726	313.645	29.9826
264687_at	cysteine protease, papain-like (XBCP3)	AT1G09850	9.079e-06	0.0009601	16.31	1.19469	39.2397	6.08854
252870_at	adenylylsulfate kinase 2 (AKN2)	AT4G39940	1.037e-05	0.001069	418.736	35.3784	879.307	198.083
259189_at	arabinogalactan-protein (AGP11)	AT3G01700	1.073e-05	0.001095	28.0294	1.51563	99.8303	44.3434
246884_at	ChaC-like family protein	AT5G26220	1.087e-05	0.001095	597.161	203.071	1317.8	360.926
257334_at	No description found		1.091e-05	0.001095	50.7851	3.86056	125.128	18.8486
253902_at	2S seed storage protein 4 / 2S albumin storage protein / NWMU2-2S albumin 4	AT4G27170	1.27e-05	0.001214	24974.3	3532.63	34295.1	1389.26
250646_at	peroxidase, putative	AT5G06720	1.282e-05	0.001216	8.08778	0.141685	21.8391	9.20047
256522_at	U-box domain-containing protein	AT1G66160	1.43e-05	0.001304	42.7091	9.2678	112.461	31.6882
250174_at	hydroxyproline-rich glycoprotein family protein	AT5G14380	1.473e-05	0.001323	9.79474	0.537389	41.3033	25.4836
262760_at	invertase/pectin methylesterase inhibitor family protein	AT1G10770	1.593e-05	0.00141	44.6829	0.976534	178.467	115.84
264554_at	cinnamyl-alcohol dehydrogenase family / CAD family	AT1G09510	1.644e-05	0.001437	13.4396	3.49326	32.891	7.0434
250727_at	thioredoxin-related	AT5G06430	1.681e-05	0.001437	16.9728	2.52959	37.4889	3.58742
258631_at	polygalacturonase, putative / pectinase, putative	AT3G07970	1.684e-05	0.001437	34.0049	3.47858	113.155	53.7795
247177_at	expressed protein	AT5G65300	1.737e-05	0.001472	97.5613	22.6266	276.134	97.3074
260386_at	strictosidine synthase family protein	AT1G74010	1.75e-05	0.001473	102.542	14.9193	268.691	85.0427
250097_at	expressed protein	AT5G17280	1.823e-05	0.001513	57.1343	13.0435	151.591	31.2984
253877_at	expressed protein	AT4G27435	2.036e-05	0.001655	6.72929	1.1627	14.455	3.72541
256584_at	expressed protein	AT3G28750	2.07e-05	0.001672	60.1999	9.86144	215.969	137.284
263493_at	DEAD box RNA helicase, putative	AT2G42520	2.16e-05	0.001702	140.578	57.5453	357.902	53.5788
264195_at	gibberellin-responsive protein, putative	AT1G22690	2.165e-05	0.001702	9.47316	1.26978	21.5586	5.12814
245666_at	VQ motif-containing protein	AT1G28280	2.285e-05	0.001762	78.2159	8.82679	176.06	37.7016
259044_at	polcalcin, putative / calcium-binding pollen allergen, putative	AT3G03430	2.308e-05	0.001768	8.50738	0.595262	16.9232	2.66731
249467_at	no apical meristem (NAM) family protein	AT5G39610	2.429e-05	0.001826	1156.92	108.184	1973.72	275.027
265022_at	anther-specific protein agp1	AT1G24520	2.662e-05	0.001949	41.3101	12.603	120.22	41.9375
249866_at	2-isopropylmalate synthase 3 (IMS3)	AT5G23010	2.717e-05	0.001968	958.655	208.244	1868.71	481.756
250154_at	aldose 1-epimerase family protein	AT5G15140	2.772e-05	0.001981	9.53541	1.65739	29.9744	13.4573
253831_at	expressed protein	AT4G27580	2.853e-05	0.002003	12.3261	2.09941	30.3751	6.68728
258184_at	two-component phosphorelay mediator 3 (HP3)	AT3G21510	2.866e-05	0.002003	1001.94	97.4216	1783.09	366.893
260387_at	sulfotransferase family protein	AT1G74100	3.053e-05	0.002085	81.5267	26.5065	190.251	21.646
262921_at	myb family transcription factor-related	AT1G79430	3.053e-05	0.002085	56.0837	4.27549	131.927	33.2977
248236_at	plastocyanin-like domain-containing protein	AT5G53870	3.119e-05	0.002118	51.3395	18.1006	179.907	99.8972
255284_at	5'-adenylylsulfate reductase (APR1) / PAPS reductase homolog (PRH19)	AT4G04610	3.177e-05	0.002145	1382.98	42.8468	2248.26	221.162
263866_at	heavy-metal-associated domain-containing protein	AT2G36950	3.274e-05	0.002198	1859.94	559.871	3425.04	423.343
260902_at	mutase family protein	AT1G21440	3.374e-05	0.002211	1446.79	256.332	2616.54	579.834
262431_at	trypsin inhibitor, putative	AT1G47540	3.397e-05	0.002211	8035.09	364.245	10959.2	462.571
256789_at	seven in absentia (SINA) family protein	AT3G13672	3.405e-05	0.002211	178.495	2.54621	379.187	89.4874
250633_at	peptide methionine sulfoxide reductase, putative	AT5G07460	3.424e-05	0.002212	124.67	33.4913	292.732	69.1744
247313_at	3'(2'),5'-bisphosphate nucleotidase / inositol polyphosphate 1-phosphatase / FIERY1 protein (FRY1) (SAL1)	AT5G63980	3.532e-05	0.002245	157.027	30.3853	342.028	55.2583
250793_at	oxidoreductase, 2OG-Fe(II) oxygenase family protein	AT5G05600	3.621e-05	0.002289	1161.87	229.028	1971.02	124.104
247718_at	lipid transfer protein 4 (LTP4)	AT5G59310	3.647e-05	0.002294	819.386	613.111	3634.18	1963.38
260261_at	VQ motif-containing protein	AT1G68450	3.787e-05	0.002345	85.6102	5.8326	196.428	32.6237
251252_at	F-box family protein	AT3G62230	3.916e-05	0.002412	8.85508	1.38769	24.242	9.58861
265482_at	glycine-rich protein	AT2G15780	4.192e-05	0.00248	46.5721	10.5832	116.14	20.9103
262717_s_at	cytochrome P450, putative	AT1G16400 : AT1G16410	4.359e-05	0.002566	649.315	158.209	1324.65	319.316
254123_at	invertase/pectin methylesterase inhibitor family protein	AT4G24640	4.393e-05	0.002574	5.64932	0.295296	13.8202	5.77764
247049_at	expressed protein	AT5G66440	4.554e-05	0.002655	294.401	53.2293	600.135	84.8651
246030_at	L-ascorbate oxidase, putative	AT5G21105	4.643e-05	0.002693	527.03	120.76	976.369	47.1549
264873_at	UDP-glucoronosyl/UDP-glucosyl transferase family protein	AT1G24100	4.846e-05	0.002784	1050.68	89.9488	1755.12	293.412
260007_at	glycine-rich protein	AT1G67870	5.208e-05	0.002938	49.4034	12.2896	128.19	41.5933
246429_at	heavy-metal-associated domain-containing protein / copper chaperone (CCH)-related	AT5G17450	5.395e-05	0.002999	26.5521	8.04161	69.2885	23.3359
264148_at	no apical meristem (NAM) family protein	AT1G02220	5.527e-05	0.003044	1105.55	99.6779	1887.89	374.105
267058_at	protein kinase family protein	AT2G32510	6.344e-05	0.00343	100.062	86.3017	338.942	101.103
265475_at	ferredoxin--nitrite reductase, putative	AT2G15620	6.493e-05	0.003464	504.715	82.8018	909.796	60.7663
246987_at	myb family transcription factor	AT5G67300 : AT5G67310	6.712e-05	0.003565	2006.6	106.721	3041.39	234.91
254492_at	DREPP plasma membrane polypeptide family protein	AT4G20260	7.009e-05	0.003656	1970.53	286.631	3084.05	133.959
259749_at	ribose 5-phosphate isomerase-related	AT1G71100	7.383e-05	0.003811	118.396	20.0365	263.917	60.8437
248125_at	protease inhibitor/seed storage/lipid transfer protein (LTP) family protein	AT5G54740	7.406e-05	0.003811	18193.3	385.151	22881.6	1092.43
255694_at	basic helix-loop-helix (bHLH) family protein	AT4G00050	7.478e-05	0.003811	8.51566	0.51277	16.0144	1.79718
246765_at	expressed protein	AT5G27330	7.498e-05	0.003811	14.8929	2.94866	32.9031	6.39848
253894_at	2S seed storage protein 2 / 2S albumin storage protein / NWMU2-2S albumin 2	AT4G27150	7.56e-05	0.003811	26871	1573.59	34017.8	2022.01
262838_at	major latex protein-related / MLP-related	AT1G14960	7.629e-05	0.003811	23.8076	6.84148	55.603	11.807
247402_at	expressed protein	AT5G62750	7.717e-05	0.003827	19.7708	3.09582	58.4074	28.5773
250631_at	pectinesterase family protein	AT5G07430	7.792e-05	0.003848	26.0678	2.15988	90.527	47.3218
250606_s_at	pectinesterase family protein	AT1G69940 : AT5G07410	8.462e-05	0.004045	130.1	20.9488	346.205	148.942
252008_at	expressed protein	AT3G52610	8.776e-05	0.004178	69.6898	20.5298	155.874	18.2789
265194_at	1-aminocyclopropane-1-carboxylate oxidase / ACC oxidase / ethylene-forming enzyme (ACO) (EAT1)	AT1G05010	8.874e-05	0.004208	1901.45	310.23	3066.77	356.436
261033_at	expressed protein	AT1G17380	9.31e-05	0.004329	54.2495	10.4532	136.87	53.0091
260337_at	WRKY family transcription factor	AT1G69310	9.457e-05	0.00438	15.3675	1.21931	32.7128	3.38748
249376_at	nitrate-responsive NOI protein, putative	AT5G40645	9.896e-05	0.004559	84.4655	20.4097	189.305	42.089
261159_s_at	cyclin 1b (CYC1b)	AT1G34460 : AT5G06150	0.000106	0.00478	14.0484	5.60143	79.0506	60.5223
249757_at	proline-rich family protein	AT5G24316	0.0001094	0.004916	29.8053	12.1401	84.6362	39.3619
260492_at	endo-polygalacturonase, putative	AT2G41850	0.0001181	0.005225	2183.38	249.639	3365.3	455.53
252269_at	expressed protein	AT3G49580	0.0001203	0.005284	1986.83	425.621	3221.37	494.053
249416_at	expressed protein	AT5G39570	0.0001223	0.005334	1400.93	154.44	2168.27	144.203
261412_at	L-ascorbate peroxidase 1, cytosolic (APX1)	AT1G07890	0.0001274	0.005516	1414.6	253.128	2309.3	359.615
253908_at	auxin-responsive GH3 family protein	AT4G27260	0.0001322	0.005622	238.51	16.1762	438.669	33.3147
255773_at	sulfotransferase family protein	AT1G18590	0.0001334	0.005641	353.471	109.269	746.637	194.355
245662_at	expressed protein	AT1G28190	0.0001346	0.005662	167.265	60.4464	410.88	161.887
266965_at	nodulin MtN21 family protein	AT2G39510	0.0001356	0.005687	32.2321	22.3341	97.2863	41.876
262608_at	2-oxoglutarate-dependent dioxygenase, putative	AT1G14120	0.0001366	0.005708	16.5588	0.860002	52.022	26.8712
248563_at	UDP-glucoronosyl/UDP-glucosyl transferase family protein	AT5G49690	0.0001407	0.00586	17.4096	4.19431	50.7865	24.0853
250252_at	transporter-related	AT5G13750	0.0001414	0.005868	846.039	19.0256	1354.17	230.848
266364_at	expressed protein	AT2G41230	0.0001492	0.006135	2502.76	152.478	3776.81	294.9
253725_at	profilin 3 (PRO3) (PFN3)	AT4G29340	0.0001501	0.006136	6.06029	0.809081	10.5783	2.05951
262574_at	expressed protein	AT1G15230	0.0001539	0.006234	1384.4	258.75	2241.36	314.684
256300_at	no apical meristem (NAM) family protein	AT1G69490	0.000156	0.006271	179.534	36.1396	339.821	53.6579
260560_at	chitinase, putative	AT2G43590	0.0001572	0.006271	142.251	44.2403	321.073	102.357
245443_at	terpene synthase/cyclase family protein	AT4G16730	0.0001611	0.006355	70.2745	25.6992	198.026	108.133
247149_at	hydroxyproline-rich glycoprotein family protein	AT5G65660	0.0001619	0.006363	1168.44	211.364	1846.53	147.397
253022_at	expressed protein	AT4G38060	0.0001641	0.006431	558.476	311.714	1246.16	296.429
244906_at	No description found		0.0001699	0.006589	10.8158	1.85344	23.4539	7.19657
248534_at	invertase/pectin methylesterase inhibitor family protein	AT5G50030	0.0001772	0.006765	30.2743	1.87628	93.7865	49.8256
265945_at	FAD-binding domain-containing protein / cytokinin oxidase family protein	AT2G19500	0.0001792	0.006819	31.2013	7.32015	69.8048	14.2459
261794_at	ovule development protein, putative	AT1G16060	0.0001799	0.006825	12.0789	1.83853	23.5098	2.50767
259538_at	calmodulin, putative	AT1G12310	0.0001867	0.007012	943.402	42.9143	1404.39	81.4745
256964_at	arabinogalactan-protein (AGP12)	AT3G13520	0.0001872	0.007012	2172.1	554.303	3618.13	849.071
263073_at	auxin efflux carrier family protein	AT2G17500	0.0001872	0.007012	887.481	75.9665	1565.36	496.347
247282_at	latex-abundant family protein (AMC3) / caspase family protein	AT5G64240	0.0001922	0.007046	421.934	85.8315	770.587	159.21
253332_at	peroxidase, putative	AT4G33420	0.0001933	0.007046	6.09301	0.477114	11.1869	2.78092
252034_at	expressed protein	AT3G52040	0.0001934	0.007046	229.565	43.047	419.301	34.9948
267083_at	touch-responsive protein / calmodulin-related protein 3, touch-induced (TCH3)	AT2G41100	0.0001969	0.007123	14.4485	2.37241	48.7447	27.8502
249377_at	expressed protein	AT5G40690	0.0002001	0.007179	2076.13	92.0422	3025.32	294.793
250580_at	glutamate dehydrogenase 2 (GDH2)	AT5G07440	0.0002064	0.007297	756.925	64.9061	1246.67	217.966
259520_at	expressed protein	AT1G12320	0.000209	0.007366	364.946	41.4371	665.536	195.508
256548_at	nodulin MtN3 family protein	AT3G14770	0.0002111	0.007383	1946.91	152.188	3022.76	488.81
249988_at	expressed protein	AT5G18310	0.0002144	0.00747	766.202	39.7023	1196.35	32.0141
245151_at	pectinesterase family protein	AT2G47550	0.0002202	0.007626	129.607	50.1282	311.289	111.322
253042_at	formamidase, putative / formamide amidohydrolase, putative	AT4G37550	0.00023	0.00783	28.2696	5.77474	61.2691	12.6094
260933_at	expressed protein	AT1G02470	0.0002325	0.007893	414.73	69.2818	696.308	48.4112
253226_at	glycosyl hydrolase family 35 protein	AT4G35010	0.000234	0.007922	17.812	3.25064	43.5104	16.9254
250483_at	hydrolase, alpha/beta fold family protein	AT5G10300	0.0002364	0.007957	1350.03	165.388	2116.56	343.347
256017_at	expressed protein	AT1G19180	0.0002399	0.008036	4085.59	462.885	5898.22	502.931
250358_at	arabinogalactan-protein (AGP15)	AT5G11740	0.0002411	0.008036	2385.23	224.523	3522.61	144.176
264636_at	expressed protein	AT1G65490	0.0002422	0.008036	12.5586	4.3776	27.9743	8.98209
265368_at	C2 domain-containing protein	AT2G13350	0.0002434	0.008036	10.3549	3.02752	24.6655	10.1776
254232_at	coronatine-responsive tyrosine aminotransferase / tyrosine transaminase	AT4G23600	0.0002444	0.008047	310.897	106.432	562.553	15.936
245946_at	glyoxal oxidase-related	AT5G19580	0.0002461	0.008079	31.0337	5.70214	69.781	18.5521
266193_at	expressed protein	AT2G39080	0.0002692	0.008602	14.0595	1.98626	28.8049	7.11808
260101_at	trypsin and protease inhibitor family protein / Kunitz family protein	AT1G73260	0.00027	0.008603	290.667	123.457	571.52	56.8801
266393_at	glycine-rich protein / late embryogenesis abundant protein (M17)	AT2G41260	0.0002728	0.008647	552.022	344.951	1345.78	572.454
260651_at	expressed protein	AT1G32460	0.0002809	0.008786	1999.75	126.796	2914.31	238.558
244972_at	No description found		0.0002852	0.008831	7.74713	4.44686	24.3491	17.366
247825_at	zinc finger (Ran-binding) family protein	AT5G58470	0.0002864	0.008843	82.3122	53.0244	193.728	16.8894
254063_at	protein kinase family protein	AT4G25390	0.0002959	0.009047	46.1818	3.27811	96.1966	18.7288
260004_at	expressed protein	AT1G67860	0.0002976	0.009073	3051.78	226.951	4374.95	369.983
263923_at	expressed protein	AT2G36485	0.0002993	0.009099	9.32078	1.1936	16.7956	3.17246
262496_at	expressed protein	AT1G21790	0.0003026	0.009177	167.357	24.3792	321.505	33.6984
246545_at	pectate lyase family protein	AT5G15110	0.0003091	0.009228	6.23045	0.664867	11.165	2.68734
248714_at	polygalacturonase, putative / pectinase, putative	AT5G48140	0.0003094	0.009228	8.13975	0.689818	19.0074	7.24015
252136_at	calmodulin-related protein, putative	AT3G50770	0.0003127	0.009252	9.43538	1.57562	20.9113	8.47092
264894_at	hydroxyproline-rich glycoprotein family protein	AT1G23040	0.0003129	0.009252	1298.34	55.7805	1910.85	175.684
248822_at	peroxidase, putative	AT5G47000	0.0003136	0.009252	8.19299	0.683042	18.0337	7.2656
257819_at	rapid alkalinization factor (RALF) family protein	AT3G25165	0.000317	0.009323	13.9012	2.38482	36.1787	19.9188
256865_at	NAD-dependent epimerase/dehydratase family protein	AT3G23820	0.0003191	0.00934	395.452	9.75443	641.566	23.1103
251370_at	expressed protein	AT3G60450	0.0003245	0.009435	77.5929	29.6731	165.336	39.0409
265173_at	expressed protein	AT1G23530	0.0003394	0.009796	7.50186	1.24343	13.231	1.92549

## Sheet: hub1-2_DOWN
Differentially downregulated genes in hub1-2 compared to Ler
See manuscript text for details
Affymetrix					Ler	Ler	rdo2-1	rdo2-1
probe identifier	Gene anotation	AGI code	P-value	False Discovery Rate	Average signal	STDEV	Average signal	STDEV
249548_at	protease inhibitor/seed storage/lipid transfer protein (LTP) family protein	AT5G38170	4.441e-16	5.58e-12	614.83	74.238	43.2401	9.94114
266762_at	short-chain dehydrogenase/reductase (SDR) family protein	AT2G47120	9.881e-15	4.138e-11	424.959	62.5116	37.2958	7.40875
248911_at	expressed protein	AT5G45830	2.354e-14	4.619e-11	1193.09	298.994	204.339	1.75438
256994_s_at	myrcene/ocimene synthase, putative	AT3G25820 : AT3G25830	2.509e-14	4.619e-11	690.923	110.401	67.2692	18.1914
258580_at	germin-like protein, putative	AT3G04170	2.542e-14	4.619e-11	2664.83	1417.2	112.741	37.5334
259918_at	ovule development protein, putative	AT1G72570	2.731e-14	4.619e-11	312.691	10.6018	17.8835	7.85155
258582_at	germin-like protein, putative	AT3G04150	3.308e-14	4.619e-11	579.959	361.681	20.2371	3.43884
266770_at	expansin, putative (EXP15)	AT2G03090	5.596e-14	6.645e-11	1198.87	281.683	84.8748	40.2436
253241_at	fatty acid elongase 1 (FAE1)	AT4G34520	5.818e-14	6.645e-11	581.355	124.926	74.8194	10.1191
265117_at	protease inhibitor/seed storage/lipid transfer protein (LTP) family protein	AT1G62500	1.397e-13	1.462e-10	299.083	49.3985	35.8194	8.64512
251382_at	pectinesterase family protein	AT3G60730	2.605e-13	2.189e-10	2117.01	398.177	396.646	100.636
248028_at	expressed protein	AT5G55620	2.9e-13	2.189e-10	1463.73	248.464	278.3	63.248
249547_at	protease inhibitor/seed storage/lipid transfer protein (LTP) family protein	AT5G38160	2.933e-13	2.189e-10	1369.47	124.964	78.2973	42.7181
246502_at	acyl-(acyl-carrier-protein) desaturase, putative / stearoyl-ACP desaturase, putative	AT5G16240	3.344e-13	2.211e-10	206.169	29.2486	26.4116	4.24109
258111_at	cytochrome P450, putative	AT3G14630	3.575e-13	2.246e-10	97.9591	27.7434	10.3966	2.30397
248510_at	Mutator-like transposase family	AT5G50315	1.116e-12	5.611e-10	1296.39	148.959	391.04	37.2659
264735_s_at	expressed protein	AT1G62000 : AT1G62060 : AT1G62080 : AT1G62220	1.55e-12	7.454e-10	13430.2	4346.26	2266.68	563.345
266169_at	serine protease inhibitor, potato inhibitor I-type family protein	AT2G38900	2.555e-12	1.146e-09	4188.32	326.561	1575.67	92.3595
266367_s_at	expressed protein	AT2G41390 : AT2G41400	3.463e-12	1.5e-09	7442.57	3651.28	1002.56	125.356
266223_at	osmotin-like protein, putative	AT2G28790	5.737e-12	2.253e-09	734.977	96.2318	197.239	13.0942
259592_at	lipid transfer protein-related	AT1G27950	6.411e-12	2.379e-09	2137.45	85.8533	828.48	44.5626
264741_at	aspartyl protease family protein	AT1G62290	6.436e-12	2.379e-09	6072.3	317.218	2357.7	279.435
263979_at	protodermal factor 1 (PDF1)	AT2G42840	6.703e-12	2.406e-09	3358.74	247.977	1203.19	149.913
254104_at	integral membrane family protein	AT4G25040	7.729e-12	2.684e-09	1166.31	147.025	346.649	46.4529
250501_at	sinapoylglucose:choline sinapoyltransferase (SNG2)	AT5G09640	1.055e-11	3.403e-09	1732.78	109.873	590.734	71.4913
261203_at	expressed protein	AT1G12845	1.065e-11	3.403e-09	53.4724	17.5264	7.43096	1.03952
262238_at	expressed protein	AT1G48300	1.083e-11	3.403e-09	1921.6	82.5009	673.913	60.9559
254607_at	expressed protein	AT4G18920	1.218e-11	3.608e-09	434.965	77.7263	82.9587	17.5618
267317_at	pollen Ole e 1 allergen and extensin family protein	AT2G34700	1.263e-11	3.608e-09	833.916	225.533	155.513	32.3409
263942_at	beta-Ig-H3 domain-containing protein / fasciclin domain-containing protein	AT2G35860	1.41e-11	3.938e-09	75.0906	14.8467	12.0437	2.61129
252645_at	basic leucine zipper transcription factor (BZIP67)	AT3G44460	1.672e-11	4.309e-09	190.322	16.5254	42.3477	4.91617
258498_at	ABA-responsive protein-related	AT3G02480	1.68e-11	4.309e-09	16192.1	1302.89	8815.91	351.891
255814_at	glyoxal oxidase-related	AT1G19900	1.758e-11	4.418e-09	5430.64	1777.95	1439.54	54.2312
265617_at	phosphate translocator-related	AT2G25520	1.84e-11	4.532e-09	1396.76	169.21	469.799	61.7322
258579_s_at	germin-like protein, putative	AT3G04180 : AT3G04190	2.029e-11	4.902e-09	1870.66	960.956	256.492	14.5909
249215_at	dihydroflavonol 4-reductase (dihydrokaempferol 4-reductase) (DFR)	AT5G42800	2.097e-11	4.972e-09	698.404	241.057	112.654	21.1553
266314_at	PAZ domain-containing protein / piwi domain-containing protein	AT2G27040	2.151e-11	5.005e-09	220.523	44.9004	42.2376	4.34357
251301_at	cytochrome P450, putative	AT3G61880	2.479e-11	5.663e-09	1603.87	594.136	276.046	61.5282
245629_at	expressed protein	AT1G56580	4.135e-11	8.66e-09	1404.7	330.143	406.245	39.5582
245004_at	No description found		4.703e-11	9.531e-09	1647.35	314.451	425.661	116.829
261570_at	fatty acid elongase 3-ketoacyl-CoA synthase 1 (KCS1)	AT1G01120	5.042e-11	9.898e-09	909.928	69.8397	327.639	22.5874
254339_at	glycosyl hydrolase family 1 protein	AT4G22100	5.676e-11	1.081e-08	1226.64	127.729	452.275	17.0798
251964_at	DNA-binding S1FA family protein	AT3G53370	6.659e-11	1.249e-08	882.225	164.656	280.868	8.86697
245703_at	S-adenosyl-L-methionine:carboxyl methyltransferase family protein	AT5G04380	7.514e-11	1.388e-08	777.738	96.1439	249.594	30.5325
250207_at	chalcone synthase / naringenin-chalcone synthase	AT5G13930	7.744e-11	1.41e-08	350.244	250.378	10.9292	3.89701
254386_at	peroxidase 42 (PER42) (P42) (PRXR1)	AT4G21960	8.582e-11	1.519e-08	2995.52	538.337	1121.45	131.994
257761_at	expressed protein	AT3G23090	9.025e-11	1.575e-08	1068.19	82.8286	407.221	23.5998
247965_at	arabinogalactan-protein (AGP14)	AT5G56540	9.891e-11	1.703e-08	6570.19	1400.55	2389.61	311.572
262589_s_at	MATE efflux family protein	AT1G15150 : AT1G15160	1.017e-10	1.707e-08	92.1958	7.26296	20.4039	0.825348
255302_at	methionine sulfoxide reductase domain-containing protein / SeIR domain-containing protein	AT4G04830	1.042e-10	1.722e-08	2695.85	325.227	1015.33	133.744
261354_at	MutT/nudix family protein	AT1G79690	1.156e-10	1.861e-08	986.717	108.575	389.779	10.1517
256825_at	protease inhibitor/seed storage/lipid transfer protein (LTP) family protein	AT3G22120	1.713e-10	2.577e-08	216.009	20.5349	49.2447	8.90389
264782_at	myb family transcription factor (MYB60)	AT1G08810	1.723e-10	2.577e-08	76.8126	23.9381	11.8125	3.37976
249497_at	hydrolase, alpha/beta fold family protein	AT5G39220	1.774e-10	2.623e-08	1100.19	275.174	274.416	70.9798
251181_at	invertase/pectin methylesterase inhibitor family protein	AT3G62820	1.99e-10	2.874e-08	58.9751	1.86016	14.2761	2.10222
248185_at	glycosyltransferase family protein	AT5G54060	2.032e-10	2.902e-08	91.5844	47.1979	8.7588	1.95724
250620_at	embryo-specific protein 3, putative	AT5G07190	2.136e-10	3.011e-08	9455.7	479.062	5068.53	453.274
255726_at	lysine and histidine specific transporter, putative	AT1G25530	2.209e-10	3.05e-08	354.588	43.2954	102.833	17.2712
259095_at	acyl carrier protein 1, chloroplast (ACP-1)	AT3G05020	2.31e-10	3.12e-08	153.076	15.4273	40.6569	2.69889
251436_at	expressed protein	AT3G59900	2.422e-10	3.237e-08	679.521	172.788	188.553	22.4741
266736_at	cytochrome P450 family protein	AT2G46960	2.795e-10	3.658e-08	458.205	111.168	114.344	26.2282
261016_at	glycosyl hydrolase family 1 protein	AT1G26560	2.831e-10	3.667e-08	665	29.8446	217.059	43.1461
246498_at	acyl-(acyl-carrier-protein) desaturase, putative / stearoyl-ACP desaturase, putative	AT5G16230	3.037e-10	3.816e-08	177.08	68.466	28.1526	3.60326
259736_at	endo-1,4-beta-glucanase, putative / cellulase, putative	AT1G64390	3.407e-10	4.238e-08	73.8843	33.1565	9.17552	2.67131
267389_at	glycosyl hydrolase family 1 protein	AT2G44460	4.296e-10	5.17e-08	2286.3	502.73	388.298	225.484
254283_s_at	leucoanthocyanidin dioxygenase, putative / anthocyanidin synthase, putative	AT4G22870 : AT4G22880	4.6e-10	5.402e-08	436.203	258.889	33.0884	14.3599
266905_at	katanin, putative	AT2G34560	4.75e-10	5.526e-08	553.168	66.2084	178.23	27.1456
261569_at	myb family transcription factor	AT1G01060	4.924e-10	5.625e-08	527.949	101.089	139.995	27.6148
246315_at	hypothetical protein	AT3G56870	6.221e-10	6.797e-08	38.2275	5.73692	10.4856	1.2863
253984_at	oligopeptide transporter OPT family protein	AT4G26590	6.574e-10	7.121e-08	388.305	16.8616	118.08	12.2994
255626_at	meprin and TRAF homology domain-containing protein / MATH domain-containing protein	AT4G00780	6.808e-10	7.312e-08	343.689	37.526	98.3337	9.47095
251339_at	expressed protein	AT3G60780	7.499e-10	7.985e-08	21.5516	1.27865	6.67578	0.293876
253590_at	expressed protein	AT4G30850	7.583e-10	8.006e-08	218.335	43.4972	57.9033	3.1863
257869_at	ER lumen protein retaining receptor family protein	AT3G25160	8.359e-10	8.595e-08	182.581	43.1312	39.4145	13.2203
246810_at	hypothetical protein	AT1G43200 : AT1G43220 : AT4G07520 : AT4G08600 : AT5G27160	9.428e-10	9.553e-08	248.03	76.8441	52.7668	2.25099
261059_at	AP2 domain-containing transcription factor, putative	AT1G01250	1e-09	9.973e-08	610.723	42.8359	209.745	32.1362
254036_at	cationic peroxidase, putative	AT4G25980	1.131e-09	1.11e-07	18.0877	5.48469	4.51891	0.176705
257702_at	CTP synthase, putative / UTP--ammonia ligase, putative	AT3G12670	1.189e-09	1.149e-07	683.08	71.8546	247.509	29.3088
261845_at	NRAMP metal ion transporter 6, putative (NRAMP6)	AT1G15950 : AT1G15960	1.275e-09	1.223e-07	1148.21	68.4183	485.876	58.8982
245020_at	No description found		1.526e-09	1.44e-07	77.5843	18.6838	19.0391	2.67152
251898_at	floral homeotic protein APETALA3 (AP3)	AT3G54340	1.535e-09	1.44e-07	455.86	47.7261	137.855	33.4132
255527_at	expressed protein	AT4G02360	1.74e-09	1.561e-07	94.7284	20.1385	23.6338	2.21605
245891_at	amino acid permease 2 (AAP2)	AT5G09220	1.933e-09	1.722e-07	830.455	222.366	265.342	19.1257
261809_at	rac GTPase activating protein, putative	AT1G08340	2.051e-09	1.815e-07	18.098	2.4638	5.52358	1.16111
265296_at	S-adenosyl-L-methionine:carboxyl methyltransferase family protein	AT2G14060	2.366e-09	2.05e-07	289.511	34.2463	87.0364	3.749
258321_at	chlorophyll A-B binding family protein / early light-induced protein (ELIP)	AT3G22840	2.491e-09	2.143e-07	1622.42	394.275	559.748	61.6808
260267_at	very-long-chain fatty acid condensing enzyme (CUT1)	AT1G68530	2.523e-09	2.156e-07	48.3369	17.9475	9.42938	2.16895
266996_at	cytochrome P450 family protein	AT2G34490	2.681e-09	2.261e-07	21.8435	2.01747	6.56903	1.00206
266295_at	tubulin beta-7 chain (TUB7)	AT2G29550	2.878e-09	2.395e-07	73.6579	8.41788	21.0198	1.15837
257793_at	expressed protein	AT3G26960	3.249e-09	2.668e-07	79.5012	47.4005	12.0669	1.41983
248889_at	expressed protein	AT5G46230	3.621e-09	2.955e-07	2105.87	199.753	1073.28	53.3274
245006_at	No description found		3.992e-09	3.216e-07	2014.59	765.359	249.518	150.049
263238_at	auxin-responsive protein, putative	AT2G16580	4.055e-09	3.246e-07	67.3962	2.08398	17.7179	3.66871
262195_at	pollen Ole e 1 allergen and extensin family protein	AT1G78040	4.829e-09	3.816e-07	2732.09	186.259	1422.65	88.4505
256964_at	arabinogalactan-protein (AGP12)	AT3G13520	4.972e-09	3.904e-07	2172.1	554.303	789.64	172.794
249791_at	amino acid transporter family protein	AT5G23810	5.455e-09	4.231e-07	69.479	11.3229	16.6633	5.11296
250083_at	glutathione S-transferase, putative	AT5G17220	6.102e-09	4.652e-07	716.98	420.654	60.6831	30.8443
264606_at	glycine-rich protein	AT1G04660	6.793e-09	5.142e-07	865.72	514.23	142.6	26.4609
246613_at	acetyl-CoA carboxylase, biotin carboxylase subunit (CAC2)	AT5G35360	7.147e-09	5.377e-07	120.395	3.56587	34.6758	3.27541
266712_at	FAD-binding domain-containing protein	AT2G46750	7.37e-09	5.477e-07	85.0721	26.015	18.1995	6.61523
261991_at	expressed protein	AT1G33700	7.411e-09	5.477e-07	127.247	34.6516	28.1404	5.98456
245634_at	nodulin MtN21 family protein	AT1G25270	8.47e-09	6.082e-07	19.8704	2.38564	6.41005	1.16855
264891_at	pectinesterase family protein	AT1G23200	9.953e-09	7.026e-07	135.865	51.7817	29.6195	5.96449
265091_s_at	pseudogene, transferase family	AT1G03495 : AT1G03940	1.022e-08	7.169e-07	451.405	271.891	47.7309	17.8907
265107_s_at	short-chain dehydrogenase/reductase (SDR) family protein	AT1G62610 : AT1G63380	1.063e-08	7.31e-07	270.721	10.5757	91.8712	18.8947
253575_at	AP2 domain-containing transcription factor, putative	AT4G31060	1.065e-08	7.31e-07	90.5325	42.2591	15.9944	3.33589
263927_s_at	mannitol dehydrogenase, putative	AT2G21730 : AT2G21890	1.118e-08	7.592e-07	65.384	10.4139	20.3607	2.77299
262133_at	sulfate transporter (Sultr1;2)	AT1G78000	1.342e-08	8.829e-07	327.255	41.3186	90.517	33.5858
249337_at	glycerophosphoryl diester phosphodiesterase family protein	AT5G41080	1.422e-08	9.211e-07	97.6753	28.5553	28.365	2.92295
251188_at	expressed protein	AT3G62730	2.238e-08	1.358e-06	5709.47	689.571	2939.41	292.509
264835_at	secretory carrier membrane protein (SCAMP) family protein	AT1G03550	2.413e-08	1.458e-06	76.5628	14.9022	23.8712	1.57722
259072_at	beta-Ig-H3 domain-containing protein / fasciclin domain-containing protein	AT3G11700	2.462e-08	1.473e-06	192.42	21.2409	66.6549	6.08496
266849_at	vacuolar processing enzyme alpha / alpha-VPE	AT2G25940	2.563e-08	1.519e-06	93.6512	5.61989	30.4105	4.66989
247780_at	dehydrodolichyl diphosphate synthase, putative / DEDOL-PP synthase, putative	AT5G58770	3.275e-08	1.888e-06	478.246	96.3165	173.481	26.9575
257102_at	xyloglucan:xyloglucosyl transferase, putative / xyloglucan endotransglycosylase, putative / endo-xyloglucan transferase, putative	AT3G25050	3.413e-08	1.949e-06	10.8079	1.83208	4.84005	0.304442
253387_at	glycine dehydrogenase (decarboxylating), putative / glycine decarboxylase, putative / glycine cleavage system P-protein, putative	AT4G33010	3.594e-08	2.016e-06	951.526	414.811	234.685	59.2337
250661_at	aspartyl protease family protein	AT5G07030	3.634e-08	2.029e-06	26.4368	4.47302	8.99518	1.94375
260570_at	acyl-(acyl-carrier-protein) desaturase / stearoyl-ACP desaturase (SSI2)	AT2G43710	3.74e-08	2.079e-06	1145.34	118.81	581.594	54.6083
250861_at	ACT domain-containing protein	AT5G04740	3.803e-08	2.105e-06	247.148	76.1109	67.6901	9.43987
248676_at	male sterility MS5 family protein	AT5G48850	3.825e-08	2.108e-06	7371.18	319.652	3958.63	866.037
266465_at	auxin-responsive GH3 family protein	AT2G47750	3.949e-08	2.167e-06	21.0345	3.92201	5.9291	2.53445
252624_at	phytosulfokines-related	AT3G44735	4.005e-08	2.188e-06	220.63	67.3667	65.4954	8.29224
267377_at	beta-ketoacyl-CoA synthase family (FIDDLEHEAD) (FDH)	AT2G26250	4.031e-08	2.192e-06	55.6739	16.693	14.4511	3.50545
265224_at	pseudogene, similar to putative pectin methylesterase	AT2G36710	4.062e-08	2.198e-06	558.353	114.038	214.757	31.2256
250727_at	thioredoxin-related	AT5G06430	4.075e-08	2.198e-06	16.9728	2.52959	7.06216	0.315302
255065_s_at	arginase, putative	AT4G08870 : AT4G08900	4.163e-08	2.226e-06	5946.13	1276.62	2776.39	470.275
247770_at	expressed protein	AT5G58930	4.379e-08	2.332e-06	411.174	51.1407	151.744	31.8198
253619_at	glycine-rich protein	AT4G30460	4.495e-08	2.373e-06	42.5064	3.71927	14.7182	2.29061
256960_at	expressed protein	AT3G13510	4.881e-08	2.545e-06	51.3362	5.3463	16.4704	3.63446
251722_at	amino acid transporter family protein	AT3G56200	5.072e-08	2.62e-06	1357.53	216.298	658.345	60.0341
267075_at	basic leucine zipper transcription factor (BZIP12)	AT2G41070	5.081e-08	2.62e-06	1123.86	85.6118	562.9	69.8358
251402_at	oxidoreductase, 2OG-Fe(II) oxygenase family protein	AT3G60290	5.296e-08	2.716e-06	418.012	23.9183	169.476	27.9372
252991_at	protein kinase family protein	AT4G38470	5.888e-08	2.971e-06	319.657	30.392	117.016	31.3708
258445_at	lipoxygenase, putative	AT3G22400	6.152e-08	3.092e-06	38.9148	24.3154	7.96238	1.50301
253289_at	expressed protein	AT4G34320	6.453e-08	3.225e-06	623.284	68.3841	256.441	40.5551
257832_at	light responsive protein-related	AT3G26740	7.04e-08	3.455e-06	2910.58	238.13	1258.55	395.267
246884_at	ChaC-like family protein	AT5G26220	7.114e-08	3.478e-06	597.161	203.071	199.335	57.9384
257775_at	short-chain dehydrogenase/reductase (SDR) family protein	AT3G29260	7.576e-08	3.69e-06	60.1391	17.4895	17.5258	2.62303
264837_at	photosystem II family protein	AT1G03600	7.961e-08	3.828e-06	2231.53	120.093	1182.16	125.943
250344_at	glutaredoxin family protein	AT5G11930	8.603e-08	4.095e-06	16.8018	2.78518	7.25314	0.58537
265108_s_at	flavin-containing monooxygenase family protein / FMO family protein	AT1G62620 : AT1G63370	9.222e-08	4.348e-06	313.596	66.9169	88.6525	35.2331
252863_at	inositol-3-phosphate synthase isozyme 1 / myo-inositol-1-phosphate synthase 1 / MI-1-P synthase 1 / IPS 1	AT4G39800	9.269e-08	4.348e-06	901.216	66.3804	331.184	138.081
244975_at	No description found		9.781e-08	4.524e-06	541.484	140.157	175.437	61.1865
267126_s_at	hydrolase, alpha/beta fold family protein	AT2G23590 : AT2G23600	9.793e-08	4.524e-06	673.768	23.7723	334.23	16.16
246972_s_at	cytochrome P450 71A15, putative (CYP71A15)	AT5G24950 : AT5G24960	9.891e-08	4.552e-06	1445.37	87.2561	817.711	30.2863
245003_at	No description found		1.032e-07	4.681e-06	396.203	242.645	45.5942	19.7522
249569_at	zinc finger (C3HC4-type RING finger) family protein	AT5G38070	1.047e-07	4.731e-06	30.4651	7.93524	9.96883	0.795871
262446_at	expressed protein	AT1G49310	1.096e-07	4.905e-06	61.402	27.0893	14.391	5.88371
260437_at	expressed protein	AT1G68380	1.097e-07	4.905e-06	493.433	81.8276	184.618	50.1842
264729_at	heavy-metal-associated domain-containing protein / copper chaperone (CCH)-related	AT1G22990	1.109e-07	4.923e-06	33.7158	14.8085	7.93042	1.55932
266532_at	UDP-glucoronosyl/UDP-glucosyl transferase family protein	AT2G16890	1.154e-07	5.105e-06	858.343	159.129	410.135	13.2738
266257_at	prephenate dehydratase family protein	AT2G27820	1.206e-07	5.317e-06	114.994	1.2923	45.3202	4.06053
250859_at	cytochrome P450, putative	AT5G04660	1.226e-07	5.366e-06	7.02791	0.199313	3.89854	0.332512
249985_at	protein kinase family protein	AT5G18500	1.338e-07	5.819e-06	75.1859	8.56498	25.0446	7.59054
263595_at	purple acid phosphatase, putative	AT2G01890	1.357e-07	5.879e-06	582.311	225.082	185.996	41.6191
255900_at	expressed protein	AT1G17830	1.499e-07	6.367e-06	84.4301	13.8291	31.149	1.02393
249047_at	FAD-binding domain-containing protein	AT5G44410	1.5e-07	6.367e-06	30.4114	4.11722	9.81468	2.89383
267481_at	leucine-rich repeat transmembrane protein kinase, putative	AT2G02780	1.535e-07	6.492e-06	79.0506	23.3294	25.1268	5.39492
252269_at	expressed protein	AT3G49580	1.561e-07	6.583e-06	1986.83	425.621	759.918	318.941
248619_at	amino acid permease 6 (AAP6)	AT5G49630	1.663e-07	6.941e-06	45.8195	18.7592	12.8184	1.59479
257541_at	hypothetical protein	AT3G25950	1.68e-07	6.968e-06	46.813	21.3473	10.4419	2.74525
255435_at	cytochrome B6-F complex iron-sulfur subunit, chloroplast / Rieske iron-sulfur protein / plastoquinol-plastocyanin reductase (petC)	AT4G03280	1.759e-07	7.201e-06	3493.56	598.912	1828.93	289.001
249174_at	expressed protein	AT5G42900	1.886e-07	7.668e-06	213.487	32.8706	78.8614	15.9383
261583_at	pyruvate dehydrogenase E1 component alpha subunit, chloroplast	AT1G01090	2.155e-07	8.597e-06	388.245	36.4692	154.371	22.174
258485_at	acyl-(acyl-carrier-protein) desaturase, putative / stearoyl-ACP desaturase, putative	AT3G02630	2.172e-07	8.638e-06	150.381	9.66678	57.9177	10.1127
251704_at	expressed protein	AT3G56360	2.201e-07	8.724e-06	3106.47	212.268	1919.07	159.116
247461_at	BAG domain-containing protein	AT5G62100	2.311e-07	9.105e-06	47.2159	18.3314	13.3154	2.4919
265347_at	SET domain-containing protein (SUVH6)	AT2G22740	2.466e-07	9.643e-06	95.4018	6.50263	38.7248	3.86891
255284_at	5'-adenylylsulfate reductase (APR1) / PAPS reductase homolog (PRH19)	AT4G04610	2.522e-07	9.735e-06	1382.98	42.8468	774.704	88.7156
250926_at	permease, cytosine/purines, uracil, thiamine, allantoin family protein	AT5G03555	2.523e-07	9.735e-06	111.743	10.975	42.9705	7.13399
265722_at	chlorophyll A-B binding protein (LHCB4.3)	AT2G40100	2.526e-07	9.735e-06	66.0176	13.8041	21.2216	6.23749
250874_at	expressed protein	AT5G04010	2.566e-07	9.829e-06	437.236	72.8019	201.354	7.57467
249231_at	expressed protein	AT5G42030	2.644e-07	1.01e-05	22.7486	9.4206	6.77135	0.465894
263410_at	expressed protein	AT2G04039	2.669e-07	1.016e-05	93.458	35.0823	25.4149	6.8041
263345_s_at	chlorophyll A-B binding protein / LHCII type II (LHCB2.2)	AT2G05070 : AT2G05100	2.811e-07	1.067e-05	3014.88	562.413	1559.52	304.617
253009_at	glycine hydroxymethyltransferase / serine hydroxymethyltransferase / serine/threonine aldolase (SHM1)	AT4G37930	3.087e-07	1.165e-05	2274.5	805.619	864.07	270.024
263754_at	DNAJ heat shock N-terminal domain-containing protein	AT2G21510	3.148e-07	1.183e-05	72.5383	18.2506	24.7851	0.772715
251225_at	glycosyl transferase family 8 protein	AT3G62660	3.243e-07	1.209e-05	207.684	42.8102	78.4927	6.05171
265416_at	DNA-binding S1FA family protein	AT2G37120	3.289e-07	1.219e-05	193.348	33.8026	81.1407	0.804729
253980_at	sucrase-related	AT4G26620	3.386e-07	1.248e-05	42.0353	4.38705	15.9596	4.75534
261363_at	multi-copper oxidase type I family protein	AT1G41830	3.418e-07	1.256e-05	484.714	16.9642	234.059	12.6742
261421_at	calmodulin-binding family protein	AT1G18840	3.433e-07	1.258e-05	233.781	21.9551	91.265	19.8879
264590_at	expressed protein	AT2G17710	3.587e-07	1.304e-05	1213.91	82.9716	654.282	92.977
247905_at	hypothetical protein	AT5G57400	3.591e-07	1.304e-05	26.2635	6.74259	9.0087	2.49379
245885_at	phosphate-responsive protein, putative	AT5G09440	3.605e-07	1.305e-05	3751.79	155.487	2186.03	300.833
259882_at	transporter-related	AT1G76670	3.675e-07	1.321e-05	462.149	64.5543	210.476	19.6136
260156_at	no apical meristem (NAM) family protein	AT1G52880	3.814e-07	1.361e-05	3203.42	356.722	1920.41	187.743
255175_at	glycosyl transferase family 2 protein	AT4G07960	3.838e-07	1.366e-05	36.3374	4.31538	15.199	1.97673
250438_at	expressed protein	AT5G10580	3.942e-07	1.391e-05	830.045	207.813	266.797	123.343
253548_at	expressed protein	AT4G30993	3.955e-07	1.392e-05	16.9675	5.34626	6.24349	1.23157
251202_at	expressed protein	AT3G63040	3.973e-07	1.394e-05	6075.71	443.293	3740.44	255.996
263587_at	synaptobrevin family protein	AT2G25340	4.02e-07	1.407e-05	1074.61	155.4	547.989	67.4293
257876_at	invertase/pectin methylesterase inhibitor family protein	AT3G17130	4.185e-07	1.461e-05	281.075	23.8671	125.979	18.0503
255080_at	arabinogalactan-protein (AGP10)	AT4G09030	4.339e-07	1.51e-05	3014.95	283.826	1819.85	192.107
246241_at	patatin, putative	AT4G37050	4.478e-07	1.546e-05	2549.18	111.36	1486.15	141.748
254971_at	major intrinsic family protein / MIP family protein	AT4G10380	4.534e-07	1.561e-05	624.066	175.868	256.721	22.7361
246216_at	cytochrome P450 90C1 (CYP90C1) / rotundifolia3 (ROT3)	AT4G36380	4.547e-07	1.561e-05	391.808	133.381	145.616	8.46028
255345_at	aspartyl protease family protein	AT4G04460	4.958e-07	1.67e-05	663.173	85.5195	335.337	36.4542
264488_s_at	expressed protein	AT1G27330 : AT1G27340 : AT1G27350	5.022e-07	1.687e-05	1574.28	188.327	854.667	54.7483
262069_at	CBS domain-containing protein	AT1G80090	5.379e-07	1.802e-05	1544.34	255.632	818.345	62.2892
249705_at	protein kinase, putative	AT5G35580	5.467e-07	1.827e-05	22.857	3.33604	9.40907	0.46819
247632_at	sec61beta family protein	AT5G60460	5.691e-07	1.882e-05	1155.77	32.5207	664.224	29.9745
250583_at	zinc finger (CCCH-type) family protein	AT5G07500	5.811e-07	1.912e-05	123.22	45.864	38.3678	6.36625
249025_at	molybdenum cofactor sulfurase family protein	AT5G44720	5.984e-07	1.958e-05	318.197	39.5225	139.873	29.3274
253475_at	expressed protein	AT4G32290	6.129e-07	1.995e-05	924.577	95.3522	510.384	28.6924
253401_at	expressed protein	AT4G32870	6.193e-07	2.011e-05	732.604	65.275	381.917	47.1599
248592_at	hydroxyproline-rich glycoprotein family protein	AT5G49280	6.298e-07	2.032e-05	17.6762	2.25987	7.53233	1.47194
250545_at	serine/threonine protein kinase, putative	AT5G08160	6.315e-07	2.032e-05	210.741	13.582	94.4999	2.16119
254388_at	methionine sulfoxide reductase domain-containing protein / SeIR domain-containing protein	AT4G21860	6.472e-07	2.059e-05	1365.43	116.117	791.585	10.5638
250262_at	immunophilin / FKBP-type peptidyl-prolyl cis-trans isomerase family protein	AT5G13410	6.473e-07	2.059e-05	64.0034	2.76616	27.8874	0.726261
255743_at	metallo-beta-lactamase family protein	AT1G25375	6.795e-07	2.145e-05	32.0037	7.74736	12.5462	0.418984
263247_at	expressed protein	AT2G31440 : AT2G31450	6.968e-07	2.178e-05	22.4306	0.629683	9.74078	0.91897
260221_at	gibberellin-responsive protein, putative	AT1G74670	7.019e-07	2.187e-05	360.751	145.689	108.461	31.0209
254083_at	protein transport protein SEC61 gamma subunit, putative	AT4G24920	7.031e-07	2.187e-05	1198.65	211.817	645.542	19.3634
257151_at	plastocyanin-like domain-containing protein	AT3G27200	7.262e-07	2.238e-05	1322.93	403.242	542.473	142.688
265567_at	pseudogene, glycine-rich protein	AT2G05580	7.505e-07	2.306e-05	5654.48	2656.44	1698.2	612.36
246157_at	NADH-cytochrome b5 reductase, putative	AT5G20080	7.619e-07	2.331e-05	93.714	21.8029	33.386	2.07448
245361_at	expressed protein	AT4G17790	7.677e-07	2.341e-05	768.194	32.9487	408.09	61.059
260254_at	glycerophosphoryl diester phosphodiesterase family protein	AT1G74210	7.789e-07	2.363e-05	229.121	91.8934	69.0752	21.0688
260262_at	exostosin family protein	AT1G68470	7.951e-07	2.402e-05	21.2398	3.48499	8.68646	0.611029
247884_at	CER1 protein, putative (WAX2)	AT5G57800	8.072e-07	2.427e-05	1739.09	484.576	803.217	132.054
257229_at	calmodulin-binding family protein	AT3G16490	8.298e-07	2.482e-05	218.314	49.9305	85.2043	17.8848
251961_at	inorganic pyrophosphatase, putative (soluble) / pyrophosphate phospho-hydrolase, putative / PPase, putative	AT3G53620	8.324e-07	2.484e-05	142.472	29.3369	51.5785	4.97573
265123_at	DC1 domain-containing protein	AT1G55440	8.372e-07	2.493e-05	264.232	7.58428	113.309	33.4367
246183_at	glycosyl hydrolase family 3 protein	AT5G20940	8.566e-07	2.542e-05	391.048	75.6722	164.542	14.5874
246274_at	zinc finger (GATA type) family protein	AT4G36620	9.02e-07	2.654e-05	358.288	116.053	141.863	17.3603
253420_at	ATP synthase family	AT4G32260	9.298e-07	2.717e-05	659.257	134.178	276.31	88.8963
252169_at	phosphoglycerate/bisphosphoglycerate mutase family protein	AT3G50520	1.016e-06	2.931e-05	121.248	25.6702	43.5539	8.82243
246516_at	expressed protein	AT5G15740	1.017e-06	2.931e-05	347.728	137.779	118.177	27.3629
254646_at	expressed protein	AT4G18530	1.046e-06	2.995e-05	994.609	109.203	563.725	42.2997
260696_at	expressed protein	AT1G32520	1.094e-06	3.116e-05	78.6043	9.21189	30.9727	7.44838
256300_at	no apical meristem (NAM) family protein	AT1G69490	1.129e-06	3.19e-05	179.534	36.1396	60.1269	23.5577
259527_at	hypothetical protein	AT1G12600	1.132e-06	3.19e-05	38.5061	6.75584	16.8534	1.16037
253875_at	plastocyanin-like domain-containing protein	AT4G27520	1.134e-06	3.19e-05	66.6049	21.7407	23.0644	4.32827
250186_at	aldose 1-epimerase family protein	AT5G14500	1.135e-06	3.19e-05	113.945	28.1936	42.9693	7.31559
256745_at	UDP-glucose 6-dehydrogenase, putative	AT3G29360	1.14e-06	3.199e-05	620.226	34.8746	306.863	46.0225
259142_at	dehydration-responsive protein-related	AT3G10200	1.201e-06	3.337e-05	106.696	38.8516	35.7711	5.127
250558_at	flavonoid 3'-monooxygenase / flavonoid 3'-hydroxylase (F3'H) / cytochrome P450 75B1 (CYP75B1) / transparent testa 7 protein (TT7)	AT5G07990	1.232e-06	3.386e-05	272.751	68.7781	115.36	5.36358
249797_at	remorin family protein	AT5G23750	1.253e-06	3.437e-05	400.769	36.4447	199.239	23.4932
259751_at	myb family transcription factor	AT1G71030	1.282e-06	3.486e-05	1682.95	347.708	892.61	97.1839
246411_at	amine oxidase family	AT1G57770	1.296e-06	3.518e-05	29.4164	5.6192	12.3384	0.740563
247762_at	proline-rich family protein	AT5G59170	1.603e-06	4.267e-05	13423.8	1707.56	9370.52	438.457
250955_at	expressed protein	AT5G03190	1.62e-06	4.294e-05	86.3919	17.3542	31.2374	9.91118
265658_at	aminotransferase class I and II family protein	AT2G13810	1.733e-06	4.546e-05	1913.59	338.157	1055.94	54.1787
247073_at	oxygen-evolving enhancer protein 1-1, chloroplast / 33 kDa subunit of oxygen evolving system of photosystem II (PSBO1) (PSBO)	AT5G66570	1.751e-06	4.584e-05	1086.32	285.67	524.448	103.255
248886_at	phosphate/triose-phosphate translocator, putative	AT5G46110	1.832e-06	4.777e-05	250.536	89.3974	79.6049	39.5468
252618_at	lipoxygenase (LOX2)	AT3G45140	1.874e-06	4.865e-05	3656.96	1434.03	1670.7	220.143
251827_at	chalcone-flavanone isomerase / chalcone isomerase (CHI)	AT3G55120	1.904e-06	4.934e-05	68.8422	32.4216	21.2657	2.02437
255295_at	sugar transporter family protein	AT4G04760	1.991e-06	5.148e-05	21.1064	4.75946	8.96319	0.981249
245768_at	disease resistance protein-related / LRR protein-related	AT1G33590	2.021e-06	5.206e-05	704.605	61.7774	390.817	23.252
255558_at	P II nitrogen sensing protein (GLB I)	AT4G01900	2.044e-06	5.252e-05	12.7066	1.16062	6.88689	0.235037
251937_at	expressed protein	AT3G53400	2.14e-06	5.453e-05	458.122	46.7934	227.162	32.7954
264565_at	fringe-related protein	AT1G05280	2.175e-06	5.521e-05	95.8323	53.5069	26.1875	5.14759
261131_at	expressed protein	AT1G19835	2.213e-06	5.607e-05	78.3886	24.4474	28.8143	6.20423
265471_at	peroxidase 21 (PER21) (P21) (PRXR5)	AT2G37130	2.218e-06	5.608e-05	35.0275	11.4517	11.8549	2.18213
250828_at	expressed protein	AT5G05250	2.262e-06	5.695e-05	299.199	53.5103	133.052	14.7229
262478_at	expressed protein	AT1G11170	2.27e-06	5.703e-05	1886.03	302.966	1074.51	54.4623
265730_at	60S ribosomal protein L27 (RPL27A)	AT2G32220	2.3e-06	5.745e-05	424.292	98.8585	198.024	26.103
263909_at	HhH-GPD base excision DNA repair family protein (ROS1)	AT2G36490	2.341e-06	5.802e-05	191.458	69.7337	64.8934	4.15471
258183_at	expressed protein	AT3G21550	2.38e-06	5.863e-05	359.07	90.3404	163.617	18.9101
254564_at	9-cis-epoxycarotenoid dioxygenase, putative / neoxanthin cleavage enzyme, putative / carotenoid cleavage dioxygenase, putative	AT4G19170	2.43e-06	5.951e-05	586.842	41.8366	305.989	64.0481
259154_at	reticulon family protein	AT3G10260	2.444e-06	5.974e-05	103.327	41.7672	34.1353	5.38102
249955_at	sugar transporter, putative	AT5G18840	2.67e-06	6.428e-05	762.122	207.494	363.068	76.5553
262608_at	2-oxoglutarate-dependent dioxygenase, putative	AT1G14120	2.688e-06	6.444e-05	16.5588	0.860002	8.72808	0.348776
246389_at	amino acid carrier, putative / amino acid permease, putative	AT1G77380	2.855e-06	6.79e-05	543.214	75.6032	267.203	59.3485
245353_at	expressed protein	AT4G16000	2.914e-06	6.883e-05	309.16	33.0122	147.729	28.2184
253374_at	expressed protein	AT4G33140	2.971e-06	6.992e-05	108.783	39.9476	36.7047	3.81643
252983_at	mannitol dehydrogenase, putative (ELI3-1)	AT4G37980	3.068e-06	7.204e-05	2645.92	346.965	1607.47	132.25
255786_at	coronatine-responsive protein / coronatine-induced protein 1 (CORI1)	AT1G19670	3.084e-06	7.23e-05	76.741	78.9616	9.95995	1.46804
248200_at	quercetin 3-O-methyltransferase 1 / flavonol 3-O-methyltransferase 1 / caffeic acid/5-hydroxyferulic acid O-methyltransferase (OMT1)	AT5G54160	3.265e-06	7.582e-05	630.652	103.235	329.816	22.5503
252412_at	expressed protein	AT3G47295	3.336e-06	7.733e-05	10.9858	0.829625	5.89754	0.565031
253907_at	dihydroflavonol 4-reductase family / dihydrokaempferol 4-reductase family	AT4G27250	3.386e-06	7.806e-05	115.093	14.6942	51.8981	1.60453
265867_at	expressed protein	AT2G01620	3.404e-06	7.835e-05	71.3179	6.23826	31.5288	4.72971
259663_at	prenylated rab acceptor (PRA1) family protein	AT1G55190	3.424e-06	7.862e-05	1023.97	147.237	596.971	32.9235
256673_at	beta-Ig-H3 domain-containing protein / fasciclin domain-containing protein	AT3G52370	3.504e-06	7.99e-05	22.2487	12.0169	7.3515	0.240766
264189_s_at	acyl carrier protein, chloroplast, putative / ACP, putative	AT1G54580 : AT1G54630	3.542e-06	8.048e-05	699.024	67.2779	378.971	68.9394
252711_at	protease inhibitor/seed storage/lipid transfer protein (LTP) family protein	AT3G43720	3.557e-06	8.066e-05	15.891	4.54612	6.69563	0.352305
261032_at	hydrolase, alpha/beta fold family protein	AT1G17430	3.593e-06	8.134e-05	1260.86	93.2511	737.873	113.97
264634_at	cytochrome P450 family protein	AT1G65670	3.672e-06	8.269e-05	224.736	57.8066	93.8365	23.7809
256290_at	serine carboxypeptidase S10 family protein	AT3G12203	3.931e-06	8.696e-05	206.87	45.2692	68.3427	46.5534
265677_at	PUR alpha-1 protein	AT2G32080	4.164e-06	9.163e-05	187.001	5.94272	93.6626	9.5586
267256_s_at	serine carboxypeptidase S10 family protein	AT2G23000 : AT2G23010	4.218e-06	9.267e-05	383.585	254.386	94.5277	35.5743
245780_at	expressed protein	AT1G45688	4.44e-06	9.697e-05	85.7674	12.3527	37.9637	1.73204
262176_at	3-ketoacyl-ACP synthase, putative	AT1G74960	4.454e-06	9.7e-05	150.696	27.2352	62.5281	11.0707
251531_at	protease inhibitor/seed storage/lipid transfer protein (LTP) family protein	AT3G58550	4.463e-06	9.702e-05	568.716	341.871	114.982	43.1303
247956_at	FAD-binding domain-containing protein / cytokinin oxidase family protein	AT5G56970	4.542e-06	9.857e-05	43.547	10.4375	18.4559	0.671098
253790_at	photosystem II reaction centre W (PsbW) family protein	AT4G28660	4.622e-06	9.984e-05	61.1755	14.7154	25.0917	6.40391
253863_at	ABC transporter family protein	AT4G27420	4.626e-06	9.984e-05	37.7778	5.86419	17.7046	1.56932
256454_at	isoflavone reductase, putative	AT1G75280	4.674e-06	0.0001006	1520.62	382.763	788.943	145.455
265959_at	expressed protein	AT2G37240	4.772e-06	0.0001022	166.942	46.2332	62.2204	14.029
252900_at	shikimate kinase family protein	AT4G39540	4.775e-06	0.0001022	71.2837	19.2067	29.1573	1.44572
263352_at	expressed protein	AT2G22080	4.776e-06	0.0001022	1314.67	235.644	746.82	84.1835
247421_at	seven in absentia (SINA) family protein	AT5G62800	4.817e-06	0.0001028	760.629	57.6888	452.822	20.6768
262715_at	myb family transcription factor (MYB58)	AT1G16490	4.899e-06	0.0001038	9.05898	1.34301	5.09352	0.489656
247435_at	glutathione S-transferase, putative	AT5G62480	5.078e-06	0.0001074	170.84	14.1408	79.8787	3.37501
267321_at	expressed protein	AT2G19320	5.273e-06	0.0001104	1758.13	59.4854	1103.21	89.641
265038_at	protein kinase, putative	AT1G03920	5.371e-06	0.0001117	8.32288	0.841661	5.01823	0.336587
252740_at	pectinesterase family protein	AT3G43270	5.731e-06	0.000118	15.529	1.48217	7.72604	0.958808
251814_at	chlorophyll A-B binding protein / LHCI type I (CAB)	AT3G54890	5.741e-06	0.0001181	756.161	265.431	311.692	101.297
246977_at	zinc finger (B-box type) family protein	AT5G24930	6.246e-06	0.0001265	1229.2	361.21	618.146	79.0755
250316_at	cysteine protease inhibitor, putative / cystatin, putative	AT5G12140	6.254e-06	0.0001265	911.061	123.6	524.402	22.4357
258983_at	alanine--glyoxylate aminotransferase, putative / beta-alanine-pyruvate aminotransferase, putative / AGT, putative	AT3G08860	6.301e-06	0.0001271	1716.15	330.1	965.761	126.846
255862_at	nodulin-related	AT2G30300	6.507e-06	0.000131	18.198	4.78338	8.01687	0.934895
251762_at	sedoheptulose-1,7-bisphosphatase, chloroplast / sedoheptulose-bisphosphatase	AT3G55800	6.531e-06	0.0001313	239.832	115.565	79.6119	32.7405
247268_at	protease inhibitor/seed storage/lipid transfer protein (LTP) family protein	AT5G64080	6.559e-06	0.0001317	5039.88	437.798	3326.09	108.964
246651_at	adenylate kinase family protein	AT5G35170	6.768e-06	0.000135	58.7186	11.1418	24.3187	6.19377
267304_at	metal transporter, putative (ZIP6)	AT2G30080	6.888e-06	0.0001369	91.7222	12.5116	37.4828	9.59869
267267_at	cytochrome P450 family protein	AT2G02580	7.001e-06	0.0001388	32.6365	10.2332	13.3858	1.67286
256109_at	expressed protein	AT1G16950	7.006e-06	0.0001388	202.833	16.8296	86.3237	30.3198
261149_s_at	dehydroascorbate reductase, putative	AT1G19550 : AT1G19570	7.026e-06	0.000139	3129.42	443.841	2044.97	83.8234
257867_at	expressed protein	AT3G17780	7.036e-06	0.000139	35.2019	7.25692	16.2685	2.01919
261787_at	expressed protein	AT1G16020	7.091e-06	0.0001399	26.0478	4.84653	12.0724	2.19773
263481_at	expressed protein	AT2G04025	7.251e-06	0.0001424	334.989	8.68526	153.052	46.239
252095_at	epoxide hydrolase, putative	AT3G51000	7.506e-06	0.0001469	206.117	38.0148	96.2352	16.7861
258276_at	signal peptidase, putative	AT3G15710	8.028e-06	0.0001552	60.1059	7.21152	28.4899	3.38562
255645_at	auxin-responsive family protein	AT4G00880	8.249e-06	0.0001587	94.9394	26.2767	39.9741	2.24203
245310_at	rapid alkalinization factor (RALF) family protein	AT4G13950	8.299e-06	0.0001594	91.197	22.6669	37.6003	4.32751
261129_at	tubulin alpha-2/alpha-4 chain (TUA2)	AT1G04820	8.448e-06	0.0001616	88.4615	28.5119	35.6437	0.856583
248213_at	expressed protein	AT5G53660	8.484e-06	0.000162	414.643	88.4679	206.462	47.4582
263606_at	very-long-chain fatty acid condensing enzyme, putative	AT2G16280	8.502e-06	0.000162	651.583	28.5141	372.113	43.0013
248828_at	lil3 protein, putative	AT5G47110	8.638e-06	0.0001639	139.746	55.7157	47.3414	16.2192
245213_at	photosystem II 22kDa protein, chloroplast / CP22 (PSBS)	AT1G44575	8.695e-06	0.0001645	211.025	146.635	57.6645	8.9541
263252_at	zinc finger (B-box type) family protein / salt tolerance-like protein (STH)	AT2G31380	8.977e-06	0.0001694	52.0673	31.7921	14.4921	3.83374
245061_at	ribulose bisphosphate carboxylase/oxygenase activase / RuBisCO activase	AT2G39730	9.157e-06	0.0001722	5476.46	1034.73	3276.26	431.608
254767_s_at	cytochrome P450 71A19, putative (CYP71A19)	AT4G13290 : AT4G13310	9.185e-06	0.0001723	311.927	55.6809	152.577	11.476
253090_at	beta-galactosidase, putative / lactase, putative	AT4G36360	9.187e-06	0.0001723	3401.39	116.912	2333.8	17.5367
250690_at	ABC transporter family protein	AT5G06530	9.216e-06	0.0001726	60.6484	26.8369	20.4412	3.1622
257749_at	actin 2 (ACT2)	AT3G18780	1.017e-05	0.0001885	377.385	58.7123	201.506	2.81342
266246_at	cytochrome P450, putative	AT2G27690	1.017e-05	0.0001885	12.4953	0.902994	7.24286	0.600894
253864_at	CBS domain-containing protein	AT4G27460	1.028e-05	0.0001901	412.633	42.4425	225.454	31.6449
263000_at	ABC transporter family protein	AT1G54350	1.042e-05	0.0001916	35.5286	6.34172	17.3625	0.413631
249416_at	expressed protein	AT5G39570	1.053e-05	0.0001934	1400.93	154.44	897.481	42.1082
246198_at	geranylgeranyl pyrophosphate synthase (GGPS1) / GGPP synthetase / farnesyltranstransferase	AT4G36810	1.06e-05	0.0001942	272.135	43.7214	131.961	26.1831
254956_at	nodulin MtN3 family protein	AT4G10850	1.11e-05	0.0002022	2041.01	246.65	1298.15	174.056
248494_at	short-chain dehydrogenase/reductase (SDR) family protein	AT5G50770	1.115e-05	0.0002024	300.005	95.5179	124.718	29.083
248011_at	S-adenosyl-L-methionine:carboxyl methyltransferase family protein	AT5G56300	1.201e-05	0.0002152	47.0801	24.3087	16.1299	2.55206
247131_at	ferredoxin--NADP(+) reductase, putative / adrenodoxin reductase, putative	AT5G66190	1.222e-05	0.0002187	75.864	34.1778	27.3224	4.93677
259567_at	4-coumarate--CoA ligase family / 4-coumaroyl-CoA synthase family	AT1G20500	1.232e-05	0.0002201	27.8638	9.81104	10.6041	3.68863
253631_at	NAD-dependent epimerase/dehydratase family protein	AT4G30440	1.248e-05	0.0002225	1027.69	123.997	618.24	85.166
263011_at	caleosin-related	AT1G23250	1.248e-05	0.0002225	16.8343	0.722792	9.16797	0.672853
256277_at	omega-6 fatty acid desaturase, endoplasmic reticulum (FAD2) / delta-12 desaturase	AT3G12120	1.252e-05	0.0002227	1821.53	283.715	1023.62	215.455
247035_at	basic helix-loop-helix (bHLH) family protein	AT5G67110	1.263e-05	0.0002238	48.6347	8.05099	21.3542	0.938729
255438_at	2-oxoglutarate-dependent dioxygenase (AOP1.2)	AT4G03070	1.283e-05	0.0002264	54.8044	15.052	21.9456	4.66735
251733_at	copper homeostasis factor / copper chaperone (CCH) (ATX1)	AT3G56240	1.32e-05	0.0002326	786.198	161.804	426.918	76.6664
255877_at	proton-dependent oligopeptide transport (POT) family protein	AT2G40460	1.325e-05	0.0002332	2112.45	291.241	1391.05	81.9531
259053_at	expressed protein	AT3G03320	1.357e-05	0.0002381	537.678	42.5411	325.687	14.6254
262653_at	2-oxoglutarate-dependent dioxygenase, putative	AT1G14130	1.369e-05	0.0002392	1276.17	162.394	809.393	52.3348
256453_at	dehydroascorbate reductase, putative	AT1G75270	1.37e-05	0.0002392	239.017	68.1857	100.448	27.6933
265026_at	3-oxoacyl-(acyl-carrier protein) reductase, chloroplast / 3-ketoacyl-acyl carrier protein reductase	AT1G24360	1.4e-05	0.0002433	219.662	14.3097	118.25	4.64275
248104_at	S-adenosyl-L-methionine:carboxyl methyltransferase family protein	AT5G55250	1.404e-05	0.0002434	83.889	13.0598	37.3701	8.87242
250826_at	expressed protein	AT5G05220	1.423e-05	0.0002456	2044	329.55	1320.86	5.18623
245626_at	pyrrolidone-carboxylate peptidase family protein	AT1G56700	1.455e-05	0.0002504	250.485	66.4495	108.36	35.237
256827_at	glycine-rich protein / oleosin	AT3G18570	1.459e-05	0.0002505	2780.68	266.89	1888.16	74.3502
252130_at	oxygen-evolving enhancer protein, chloroplast, putative / 33 kDa subunit of oxygen evolving system of photosystem II, putative (PSBO2)	AT3G50820	1.5e-05	0.000256	475.695	220.127	180.414	55.7987
250498_at	malate dehydrogenase, glyoxysomal	AT5G09660	1.503e-05	0.000256	161.176	104.024	41.2276	16.6853
263350_at	serine-glyoxylate aminotransferase-related	AT2G13360	1.521e-05	0.0002579	2286.02	456.141	1209.54	336.96
248468_at	reversibly glycosylated polypeptide, putative	AT5G50750	1.557e-05	0.0002623	545.964	87.3896	301.385	45.2757
264638_at	flowering locus T protein (FT)	AT1G65480	1.567e-05	0.0002636	2066.39	602.6	1093.65	284.361
255403_at	auxin-responsive GH3 family protein	AT4G03400	1.571e-05	0.0002639	486.558	119.651	250.412	5.74888
248566_s_at	ferric reductase-like transmembrane component family protein	AT5G49730 : AT5G49740	1.622e-05	0.0002718	1938.55	639.938	989.974	127.587
261924_at	proton-dependent oligopeptide transport (POT) family protein	AT1G22550	1.629e-05	0.0002721	14.2627	4.10392	6.86061	0.309105
255054_s_at	glycosyl hydrolase family 9 protein	AT4G09740 : AT4G23560	1.631e-05	0.0002721	3651.16	344.685	2488.27	98.9115
258258_at	transcriptional regulator (FUSCA3)	AT3G26790	1.646e-05	0.0002739	161.029	54.0775	65.4558	16.7592
254098_at	superoxide dismutase (Fe), chloroplast (SODB) / iron superoxide dismutase (FSD1)	AT4G25100	1.648e-05	0.0002739	21.6325	5.65359	9.13568	3.55618
252995_at	phosphoglycerate/bisphosphoglycerate mutase family protein	AT4G38370	1.658e-05	0.0002749	12.7468	0.15929	7.5252	0.873052
258662_at	expressed protein	AT3G02900	1.684e-05	0.0002784	55.8959	7.88461	26.0799	2.79965
259875_s_at	12-oxophytodienoate reductase (OPR2)	AT1G76680 : AT1G76690	1.686e-05	0.0002784	1194.93	129.856	721.96	125.19
251448_at	NADP-dependent oxidoreductase, putative	AT3G59845	1.722e-05	0.0002833	35.1904	10.6071	15.5875	1.69439
253535_at	WRKY family transcription factor	AT4G31550	1.727e-05	0.0002837	141.027	16.3511	62.3494	7.85779
265182_at	oxidoreductase, zinc-binding dehydrogenase family protein	AT1G23740	1.826e-05	0.0002984	643.373	127.971	333.819	71.8203
259308_at	GDSL-motif lipase/hydrolase family protein	AT3G05180	1.879e-05	0.0003054	26.2139	6.02334	11.9515	3.43706
258415_at	S-adenosylmethionine synthetase, putative	AT3G17390	1.883e-05	0.0003056	884.315	7.97045	561.369	37.0209
244950_at	No description found		1.886e-05	0.0003058	37.5681	13.1295	16.4451	1.08966
248685_at	expressed protein	AT5G48500	1.901e-05	0.0003074	25.1103	6.46935	11.3532	2.15165
254759_at	short-chain dehydrogenase/reductase (SDR) family protein	AT4G13180	1.917e-05	0.0003096	2670.1	162.98	1801.53	168.655
247549_at	myb family transcription factor (MYB28)	AT5G61420	1.971e-05	0.0003159	357.158	57.0282	196.577	33.0758
254658_at	expressed protein	AT4G18230	1.995e-05	0.0003193	35.7743	3.17415	18.8111	2.56579
260205_at	expressed protein	AT1G70700	2.018e-05	0.0003222	3394.27	737.4	2090.49	214.234
253276_at	caffeoyl-CoA 3-O-methyltransferase, putative	AT4G34050	2.041e-05	0.000325	818.787	202.083	441.991	68.7362
263880_at	expressed protein	AT2G21960	2.064e-05	0.0003283	64.8267	7.29022	30.8739	4.70002
261518_at	peroxidase 12 (PER12) (P12) (PRXR6)	AT1G71695	2.126e-05	0.000336	358.864	149.111	147.061	26.274
248625_at	acetyl-CoA C-acyltransferase 1 / 3-ketoacyl-CoA thiolase 1 (PKT1)	AT5G48880	2.136e-05	0.0003368	147.088	98.721	39.4671	7.70595
256622_at	zinc finger homeobox family protein / ZF-HD homeobox family protein	AT3G28920	2.164e-05	0.0003394	353.453	58.843	192.854	31.2906
263845_at	phenylalanine ammonia-lyase 1 (PAL1)	AT2G37040	2.172e-05	0.0003398	322.523	167.886	102.723	30.528
260385_at	sulfotransferase family protein	AT1G74090	2.176e-05	0.0003401	1114.95	143.86	661.277	151.611
262504_at	protein disulfide isomerase, putative	AT1G21750	2.188e-05	0.0003412	790.719	38.9515	495.009	27.178
253706_at	hexokinase 1 (HXK1)	AT4G29120 : AT4G29130	2.19e-05	0.0003412	365.772	45.4764	213.085	4.90012
264300_at	gamma-glutamyl hydrolase, putative / gamma-Glu-X carboxypeptidase, putative / conjugase, putative	AT1G78670	2.191e-05	0.0003412	1617.38	206.663	998.142	136.335
264041_at	MADS-box protein (AGL3)	AT2G03710	2.202e-05	0.0003424	41.548	14.6165	17.7059	1.01407
267175_s_at	actin 1 (ACT1)	AT2G37620 : AT3G53750	2.222e-05	0.0003448	35.292	11.9983	14.837	1.79046
257841_at	proton-dependent oligopeptide transport (POT) family protein	AT3G25260	2.239e-05	0.0003465	418.975	38.2	238.451	36.9809
245238_at	cytochrome B561 family protein	AT4G25570	2.248e-05	0.0003475	110.878	21.2722	51.959	10.2685
247170_at	protein kinase, putative	AT5G65530	2.262e-05	0.0003492	1320.78	108.203	883.303	11.218
248812_at	palmitoyl protein thioesterase family protein	AT5G47330	2.332e-05	0.0003577	331.648	33.898	172.637	16.2071
251962_at	plasma membrane intrinsic protein 2A (PIP2A) / aquaporin PIP2.1 (PIP2.1)	AT3G53420	2.334e-05	0.0003577	4483.92	607.457	2929.51	217.651
263265_at	expressed protein	AT2G38820	2.356e-05	0.0003606	1774.93	398.592	1034.49	62.5102
256115_at	uridylyltransferase-related	AT1G16880	2.409e-05	0.0003669	814.889	196.587	447.406	56.3724
252324_at	protein transport protein SEC61 gamma subunit, putative	AT3G48570	2.413e-05	0.000367	550.044	55.7129	332.599	20.671
252870_at	adenylylsulfate kinase 2 (AKN2)	AT4G39940	2.435e-05	0.0003695	418.736	35.3784	224.442	67.9915
246490_at	adenosylmethionine decarboxylase family protein	AT5G15950	2.451e-05	0.000371	470.076	78.6942	262.767	18.9928
258295_at	plastid-lipid associated protein PAP / fibrillin family protein	AT3G23400	2.471e-05	0.0003737	394.906	120.094	182.926	38.1243
252671_at	pyridine nucleotide-disulphide oxidoreductase family protein	AT3G44190	2.49e-05	0.0003761	197.035	12.1999	96.8529	22.089
259627_at	expressed protein	AT1G42960	2.513e-05	0.000379	506.37	98.7816	268.928	5.52121
258856_at	glycerophosphoryl diester phosphodiesterase family protein	AT3G02040	2.548e-05	0.0003834	1175.27	293.302	634.875	191.134
263796_at	kelch repeat-containing F-box family protein	AT2G24540	2.573e-05	0.0003867	14.0289	3.43901	7.26272	0.867422
245323_at	cysteine protease inhibitor family protein / cystatin family protein	AT4G16500	2.6e-05	0.0003899	1507.08	163.619	960.312	121.526
262878_at	expressed protein	AT1G64770	2.658e-05	0.000398	29.1702	12.1972	12.3356	1.10125
245270_at	tubulin alpha-6 chain (TUA6)	AT4G14960	2.701e-05	0.0004035	137.047	42.3113	55.9973	7.32643
257745_at	expressed protein	AT3G29240	2.737e-05	0.0004079	248.083	49.5358	121.282	16.9619
258163_at	aldose 1-epimerase family protein	AT3G17940	2.76e-05	0.0004103	420.959	23.0552	245.802	14.3513
252619_at	expressed protein	AT3G45210	2.778e-05	0.0004126	36.1402	5.8021	19.1301	1.7288
245956_s_at	luminal binding protein 2 (BiP-2) (BP2)	AT5G28540 : AT5G42020	2.793e-05	0.0004131	1509.47	64.7816	972.354	106.253
250475_at	sulfate transporter	AT5G10180	2.794e-05	0.0004131	1049.79	289.067	582.569	32.242
246468_at	UDP-glucoronosyl/UDP-glucosyl transferase family protein	AT5G17050	2.81e-05	0.0004148	193.387	34.8969	97.0559	7.06768
253200_at	vacuolar ATP synthase 16 kDa proteolipid subunit 1 / V-ATPase 16 kDa proteolipid subunit 1 (AVAP1) (AVA-P1)	AT4G34720	2.825e-05	0.0004161	1996.71	402.198	1243.26	52.6516
257769_at	auxin-responsive protein / indoleacetic acid-induced protein 7 (IAA7)	AT3G23050	2.858e-05	0.0004195	29.1932	1.19836	15.1652	0.939059
249579_at	ADP-ribosylation factor, putative	AT5G37680	2.887e-05	0.0004223	996.828	122.216	637.583	45.0537
262526_at	geranyl diphosphate synthase, putative / GPPS, putative / dimethylallyltransferase, putative / prenyl transferase, putative	AT1G17050	2.93e-05	0.0004276	145.124	42.7435	60.4772	8.54164
264143_at	latex-abundant protein, putative (AMC6) / caspase family protein	AT1G79330	2.937e-05	0.000428	33.9758	8.33769	15.0963	1.38833
246310_at	sulfate transporter (ST1)	AT3G51895	2.993e-05	0.0004342	812.034	237.045	441.518	16.1739
255761_at	hypothetical protein	AT1G16770	2.999e-05	0.0004344	1254.45	275.443	739.803	49.7997
261957_at	Cys/Met metabolism pyridoxal-phosphate-dependent enzyme family protein	AT1G64660	3.05e-05	0.000441	995.983	33.4223	657.197	35.7104
249769_at	RNA polymerase sigma subunit SigE (sigE) / sigma-like factor (SIG5)	AT5G24120	3.058e-05	0.0004417	1178.14	243.784	670.504	131.328
266022_at	subtilase family protein	AT2G05920	3.081e-05	0.0004444	730.838	16.9747	470.012	26.7575
251396_at	transketolase, putative	AT3G60750	3.111e-05	0.0004482	1015.56	278.808	579.616	21.9062
256076_at	expressed protein	AT1G18060	3.128e-05	0.0004499	273.533	58.3257	135.203	37.3727
246267_at	acyl-CoA binding protein / ACBP	AT1G31812	3.138e-05	0.0004506	1171.41	317.831	672.25	74.1312
266395_at	aconitase C-terminal domain-containing protein	AT2G43100	3.164e-05	0.0004538	729.106	128.666	380.84	148.119
245013_at	No description found		3.187e-05	0.0004556	4022.66	922.011	2324.41	577.236
246215_at	myb family transcription factor	AT4G37180	3.212e-05	0.0004586	853.319	215.526	494.501	28.4965
256008_s_at	alliinase family protein	AT1G34040 : AT1G34060	3.231e-05	0.0004608	266.054	105.247	89.7525	42.2663
264873_at	UDP-glucoronosyl/UDP-glucosyl transferase family protein	AT1G24100	3.255e-05	0.0004626	1050.68	89.9488	633.065	150.519
261708_at	expressed protein	AT1G32740	3.292e-05	0.0004674	9.19511	0.571901	5.85408	0.403674
262868_at	expressed protein	AT1G64980	3.338e-05	0.0004728	136.838	29.2567	65.9108	1.89929
261833_at	expressed protein	AT1G10670	3.378e-05	0.000477	334.788	40.345	171.439	30.3503
246092_at	glutaredoxin, putative	AT5G20500	3.414e-05	0.0004803	262.217	33.7345	145.831	9.48054
250130_at	reversibly glycosylated polypeptide, putative	AT5G16510	3.419e-05	0.0004806	62.3476	12.2715	30.9404	1.38831
259625_at	glyceraldehyde-3-phosphate dehydrogenase B, chloroplast (GAPB) / NADP-dependent glyceraldehydephosphate dehydrogenase subunit B	AT1G42970	3.487e-05	0.0004868	355.116	204.269	114.943	53.5326
253754_at	glycine-rich protein	AT4G29020	3.579e-05	0.000498	1611.04	666.086	776.374	85.5574
264346_at	1-aminocyclopropane-1-carboxylate oxidase, putative / ACC oxidase, putative	AT1G12010	3.664e-05	0.0005068	5180.86	971.281	3361.52	250.114
260137_at	senescence-associated family protein	AT1G66330	3.666e-05	0.0005068	465.997	49.8703	280.247	19.4102
265415_at	expressed protein	AT2G20890	3.743e-05	0.0005157	881.865	60.638	567.008	45.7973
248581_at	expressed protein	AT5G49900	3.904e-05	0.0005348	564.645	115.683	307.262	63.3307
249923_at	expressed protein	AT5G19120	3.919e-05	0.0005359	44.7273	7.1103	21.3184	2.89519
261279_at	chitinase-like protein 1 (CTL1)	AT1G05850	3.94e-05	0.0005369	1319.2	173.954	865.717	36.1719
260072_at	expressed protein	AT1G73650	3.966e-05	0.0005392	446.855	131.084	232.728	22.9897
252866_at	expressed protein	AT4G39840	3.97e-05	0.0005392	42.2842	6.96251	21.7287	0.473655
266352_at	invertase/pectin methylesterase inhibitor family protein	AT2G01610	3.995e-05	0.0005415	2371.28	197.794	1559.29	152.939
253765_at	expressed protein	AT4G28740	4.142e-05	0.0005603	166.816	36.5232	80.9654	10.6485
250668_at	proline-rich family protein	AT5G07020	4.176e-05	0.0005626	445.021	38.4556	259.287	13.4899
257974_at	leucine-rich repeat family protein	AT3G20820	4.226e-05	0.0005671	87.2958	16.5703	41.8858	8.34426
254578_at	pectinacetylesterase, putative	AT4G19410	4.312e-05	0.0005751	1424.52	179.784	939.419	71.9378
249867_at	2-isopropylmalate synthase 2 (IMS2)	AT5G23020	4.383e-05	0.0005823	2277.57	318.204	1405.84	293.849
263714_at	aminotransferase, putative	AT2G20610	4.384e-05	0.0005823	833.768	132.158	494.139	108.823
245532_at	cytochrome P450 97B3, putative (CYP97B3)	AT4G15110	4.394e-05	0.000583	75.2538	9.43163	39.4693	2.45105
259476_at	myb family transcription factor	AT1G19000	4.41e-05	0.0005845	1311.89	134.378	894.671	27.0679
264020_at	translocon-associated protein alpha (TRAP alpha) family protein	AT2G21160	4.466e-05	0.0005913	569.017	48.4654	351.963	17.5369
250299_at	esterase/lipase/thioesterase family protein	AT5G11910	4.487e-05	0.0005934	116.64	20.125	59.4343	5.9108
264469_at	LOB domain protein 40 / lateral organ boundaries domain protein 40 (LBD40)	AT1G67100	4.52e-05	0.0005966	1736.47	296.632	1110.93	90.5056
254551_at	lectin-related	AT4G19840	4.539e-05	0.0005979	710.823	168.658	403.628	31.1997
251524_at	aconitase C-terminal domain-containing protein	AT3G58990	4.605e-05	0.0006035	792.171	50.4475	462.488	122.198
267023_at	protein transport protein sec61, putative	AT2G34250	4.606e-05	0.0006035	1569.13	60.4042	1023.48	87.5568
261948_at	expressed protein	AT1G64680	4.621e-05	0.0006039	34.5852	15.0755	13.8908	2.56543
263829_at	expressed protein	AT2G40435	4.732e-05	0.0006168	16.0067	5.03609	7.84304	0.314131
255230_at	ferredoxin--NADP(+) reductase, putative / adrenodoxin reductase, putative	AT4G05390	4.817e-05	0.000624	411.129	59.9319	238.765	38.7797
258646_at	MATE efflux family protein	AT3G08040	4.935e-05	0.0006367	16.3565	1.90723	9.39687	0.589297
249710_at	glutamine synthetase (GS2)	AT5G35630	4.972e-05	0.0006395	408.438	198.755	167.392	26.0433
264474_s_at	ribulose bisphosphate carboxylase small chain 2B / RuBisCO small subunit 2B (RBCS-2B) (ATS2B)	AT1G67090 : AT5G38410 : AT5G38420 : AT5G38430	5.041e-05	0.0006463	6280.35	2295.71	3399.9	645.618
253636_at	expressed protein	AT4G30500	5.247e-05	0.0006673	16.2285	4.14156	8.32808	0.911899
251727_at	expressed protein	AT3G56290	5.274e-05	0.0006701	462.699	168.399	213.143	36.2953
249230_at	expressed protein	AT5G42070	5.286e-05	0.0006709	11.4153	2.85479	6.08411	0.718156
251013_at	short-chain dehydrogenase/reductase (SDR) family protein	AT5G02540	5.504e-05	0.0006922	7.73302	1.076	4.94196	0.301905
261075_at	expressed protein	AT1G07280	5.605e-05	0.000702	464.076	141.886	243.368	26.8608
245936_at	hydrolase, alpha/beta fold family protein	AT5G19850	5.61e-05	0.000702	40.6157	3.26058	20.5162	1.00395
262846_at	endomembrane protein 70, putative	AT1G14670	5.638e-05	0.0007042	56.4986	8.55004	28.5513	5.00761
267212_at	late embryogenesis abundant family protein / LEA family protein	AT2G44060	5.647e-05	0.0007047	81.7276	19.0326	40.2546	4.61438
263180_at	inosine-uridine preferring nucleoside hydrolase family protein	AT1G05620	5.684e-05	0.0007085	1046.79	96.5529	697.301	54.8971
251151_at	expressed protein	AT3G63170	5.692e-05	0.0007088	182.993	19.2957	97.7635	7.53515
266592_at	delta-8 sphingolipid desaturase, putative	AT2G46210	5.702e-05	0.0007094	45.888	9.63076	20.3776	6.75134
267262_at	sinapoylglucose:malate sinapoyltransferase (SNG1)	AT2G22990	5.883e-05	0.0007247	4868.43	258.731	3459.16	150.822
248903_at	3-oxoacyl-(acyl-carrier-protein) synthase I	AT5G46290	5.961e-05	0.0007305	44.8991	2.37703	22.5975	1.45403
257699_at	phosphoglycerate kinase, putative	AT3G12780	5.97e-05	0.0007305	507.403	120.885	267.551	50.951
257784_at	ubiquitin family protein	AT3G26980	5.971e-05	0.0007305	124.752	18.1399	59.7088	11.5342
251426_at	uridylate kinase, putative / uridine monophosphate kinase, putative / UMP kinase, putative	AT3G60180	6.055e-05	0.0007365	88.8646	15.927	44.1948	2.63921
262626_at	FtsH protease, putative	AT1G06430	6.09e-05	0.0007387	1498.17	369.006	918.022	75.9593
261247_at	expressed protein	AT1G20070	6.177e-05	0.0007477	323.828	8.48198	190.316	16.7577
262525_at	cytochrome P450, putative	AT1G17060	6.309e-05	0.0007615	21.1998	10.7763	8.63508	0.74743
259655_at	disease resistance response protein-related/ dirigent protein-related	AT1G55210	6.503e-05	0.0007804	130.495	42.2267	56.15	7.9841
253629_at	glycine-rich protein	AT4G30450	6.691e-05	0.0007984	25.714	11.0969	11.1817	0.368157
256133_at	F-box family protein	AT1G13570	6.727e-05	0.0008012	144.623	20.0226	68.6541	18.1137
265998_at	NADP-dependent glyceraldehyde-3-phosphate dehydrogenase, putative	AT2G24270	6.752e-05	0.0008034	51.3479	21.493	19.9513	4.85268
261416_at	40S ribosomal protein S15A (RPS15aA)	AT1G07770	6.832e-05	0.0008106	1540.24	69.6949	1026.28	90.1257
256049_at	calcineurin-like phosphoesterase family protein	AT1G07010	6.856e-05	0.0008111	60.5365	14.2699	28.4406	7.22257
264092_at	photosystem II 10 kDa polypeptide	AT1G79040	6.928e-05	0.0008182	4241.18	642.549	2833.89	330.972
259081_at	sodium proton exchanger, putative (NHX2)	AT3G05030	6.976e-05	0.0008226	66.2428	6.64791	33.8424	5.32952
255567_at	expressed protein	AT4G01150	6.979e-05	0.0008226	237.792	138.188	87.5212	23.0475
264777_at	L-allo-threonine aldolase-related	AT1G08630	6.996e-05	0.0008238	103.675	14.0279	52.2314	7.23168
262516_at	glutathione S-transferase, putative	AT1G17190	7.013e-05	0.0008251	20.2756	2.64503	11.0071	0.196184
265994_at	endomembrane protein 70, putative	AT2G24170	7.047e-05	0.000828	7.16221	0.785289	4.70021	0.427892
252327_at	nodulin MtN3 family protein	AT3G48740	7.062e-05	0.0008285	5497.05	677.421	3766.26	391.908
254629_at	expressed protein	AT4G18425	7.106e-05	0.0008321	2835.91	701.504	1783.14	184.756
249783_at	prolyl oligopeptidase family protein	AT5G24260 : AT5G24270	7.288e-05	0.0008482	56.3709	13.2296	27.3607	1.10095
251944_at	ABC transporter family protein	AT3G53510	7.301e-05	0.0008486	166.178	68.978	67.0854	12.8819
252445_at	glycosyl hydrolase family 3 protein	AT3G47000	7.505e-05	0.0008689	56.0555	1.69218	29.8997	3.41962
246783_at	sugar-porter family protein 2 (SFP2)	AT5G27360	7.723e-05	0.0008911	14.1423	1.74658	7.97735	1.34982
248908_at	leucine-rich repeat transmembrane protein kinase, putative	AT5G45800	7.768e-05	0.0008954	734.975	108.752	440.105	87.1319
247127_at	La domain-containing protein	AT5G66100	7.88e-05	0.0009067	30.2684	6.62428	14.7823	3.52195
249049_at	tubulin beta-4 chain (TUB4)	AT5G44340	7.969e-05	0.0009136	390.72	22.7394	220.963	53.1924
255471_at	2-oxoglutarate-dependent dioxygenase, putative (AOP3)	AT4G03050	7.978e-05	0.0009138	970.611	146.182	569.507	156.184
245002_at	No description found		8.027e-05	0.0009169	10.7919	6.59948	4.32407	0.431329
253394_at	tocopherol cyclase, chloroplast / vitamin E deficient 1 (VTE1) / sucrose export defective 1 (SXD1)	AT4G32770	8.034e-05	0.0009169	1838.4	86.1586	1236.18	98.8464
267496_at	lipase class 3 family protein	AT2G30550	8.058e-05	0.0009188	16.5404	4.34777	8.64873	0.876369
266926_at	expressed protein	AT2G46000	8.086e-05	0.0009211	24.6984	0.796735	13.8745	0.933136
264899_at	Bet v I allergen family protein	AT1G23130	8.205e-05	0.0009313	471.93	113.899	206.711	104.395
266423_at	eukaryotic rpb5 RNA polymerase subunit family protein	AT2G41340	8.311e-05	0.0009408	6.09045	1.89147	3.64965	0.285245
246700_at	cysteine synthase, putative / O-acetylserine (thiol)-lyase, putative / O-acetylserine sulfhydrylase, putative	AT5G28030	8.432e-05	0.0009502	51.0102	18.0458	21.6265	5.36633
263838_at	S-adenosylmethionine synthetase, putative	AT2G36880	8.647e-05	0.0009727	238.383	21.7777	130.282	18.8764
253425_at	centromeric protein-related	AT4G32190	8.687e-05	0.0009763	248.071	21.6011	134.534	29.2129
253237_at	aldehyde dehydrogenase (ALDH3)	AT4G34240	8.752e-05	0.000981	21.7037	5.89647	10.6217	2.63095
252879_at	transporter-related	AT4G39390	8.771e-05	0.0009813	17.6228	0.521314	9.62082	2.42658
245138_at	axial regulator YABBY1 (YABBY1) / abnormal floral organs protein (AFO) / filamentous flower protein (FIL)	AT2G45190	8.779e-05	0.0009814	49.3663	10.0092	23.3297	3.45314
256883_at	expressed protein	AT3G26440	8.809e-05	0.0009839	1222.66	138.658	826.662	19.1018
265685_at	no apical meristem (NAM) family protein	AT2G24430	8.832e-05	0.0009849	51.2404	7.44656	24.8168	5.33791
265187_at	ADP-ribosylation factor	AT1G23490	8.834e-05	0.0009849	1252.3	66.5899	871.175	41.9306
257939_at	sugar transport protein (STP4)	AT3G19930	8.87e-05	0.0009881	84.742	5.51535	45.459	3.44148
259102_at	harpin-induced family protein / HIN1 family protein / harpin-responsive family protein	AT3G11660	8.902e-05	0.0009908	643.37	190.407	349.475	39.6495
253498_at	armadillo/beta-catenin repeat family protein	AT4G31890	8.927e-05	0.0009927	11.0517	1.83937	6.59968	0.554678
254608_at	aquaglyceroporin / NOD26-like major intrinsic protein 2 (NLM2)	AT4G18910	9.038e-05	0.001002	1067.91	139.612	708.864	49.0374
260968_at	thylakoid lumenal protein-related	AT1G12250	9.039e-05	0.001002	209.213	39.4192	115.545	20.7068
262327_at	hypothetical protein	AT1G64130	9.28e-05	0.001026	224.563	133.853	74.3703	32.4173
249244_at	FtsH protease, putative	AT5G42270	9.309e-05	0.001028	1535.22	268.065	992.323	24.3572
247522_at	expressed protein	AT5G61340	9.346e-05	0.001031	47.4964	13.8639	21.7118	1.04409
249336_at	double-stranded RNA-binding domain (DsRBD)-containing protein	AT5G41070	9.422e-05	0.001038	99.5051	24.8017	47.7436	8.22831
264704_at	glycosyl transferase family 8 protein	AT1G70090	9.54e-05	0.001049	12.2598	0.747513	7.68797	0.707242
252359_at	zinc finger (CCCH-type) family protein	AT3G48440	9.549e-05	0.001049	26.8238	1.63923	15.1777	0.693356
261220_at	ER lumen protein retaining receptor family protein	AT1G19970	9.567e-05	0.001049	44.2582	9.68402	22.4188	2.24369
252427_at	basic helix-loop-helix (bHLH) family protein	AT3G47640	9.57e-05	0.001049	887.835	90.5838	551.773	98.9705
258087_at	peroxiredoxin Q, putative	AT3G26060	9.786e-05	0.00107	23.8341	7.65948	11.1104	0.600776
263875_at	stress enhanced protein 2 (SEP2)	AT2G21970	9.818e-05	0.001073	703.395	127.478	420.578	49.6153
260151_at	expressed protein	AT1G52910	9.828e-05	0.001073	17.9401	4.11391	9.58997	0.91434
260126_at	glycine hydroxymethyltransferase, putative / serine hydroxymethyltransferase, putative / serine/threonine aldolase, putative	AT1G36370	9.962e-05	0.001085	2707.95	150.492	1908.79	283.154
247232_at	ABC1 family protein	AT5G64940	0.0001013	0.001101	61.2514	19.2269	29.315	3.99722
251082_at	chlorophyll A-B binding protein CP29 (LHCB4)	AT5G01530	0.000102	0.001106	1496.52	27.1832	1037.38	42.228
245023_at	No description found		0.0001021	0.001107	627.726	369.303	175.657	80.39
252929_at	fructose-bisphosphate aldolase, putative	AT4G38970	0.000104	0.001124	729.517	441.312	265.053	140.531
253731_at	acid phosphatase class B family protein	AT4G29260	0.0001044	0.001126	109.777	29.2855	54.884	4.49841
250209_at	translocon-associated protein beta (TRAPB) family protein	AT5G14030	0.0001051	0.001132	1172.17	75.4236	812.549	7.44075
246814_at	acyl carrier protein, chloroplast, putative / ACP, putative	AT5G27200	0.0001071	0.00115	10.6396	1.68303	6.61201	0.466501
266099_at	acetyl co-enzyme A carboxylase carboxyltransferase alpha subunit family	AT2G38040	0.0001072	0.00115	36.8647	16.598	16.4824	0.315546
247696_at	myb family transcription factor (MYB59)	AT5G59780	0.0001077	0.001153	80.634	39.2572	29.5892	2.89902
259140_at	lycopene beta cyclase (LYC)	AT3G10230	0.0001077	0.001153	218.659	47.1858	104.804	34.676
253581_at	hydrophobic protein, putative / low temperature and salt responsive protein, putative	AT4G30660	0.0001078	0.001153	310.135	89.9063	154.72	38.5766
248419_at	phosphate-responsive 1 family protein	AT5G51550	0.0001083	0.001158	26.8754	3.84513	14.3885	1.83925
252321_at	expressed protein	AT3G48510	0.0001107	0.001178	69.1749	17.208	32.4501	8.77177
264204_at	sucrose transporter / sucrose-proton symporter (SUC2)	AT1G22710	0.0001107	0.001178	1615.38	192.834	1103.38	38.0634
253197_at	vestitone reductase-related	AT4G35250	0.0001116	0.001187	171.12	100.652	64.4431	5.31351
248153_at	cyclic nucleotide-regulated ion channel / cyclic nucleotide-gated channel (CNGC4)	AT5G54250	0.0001124	0.001192	145.41	37.608	67.9546	9.475
245993_at	senescence-associated protein-related	AT5G20700	0.0001126	0.001193	492.202	128.522	260.224	39.3863
250597_at	no apical meristem (NAM) family protein	AT5G07680	0.000113	0.001195	1307.21	127.007	922.421	42.9967
261751_at	thioredoxin family protein	AT1G76080	0.0001141	0.001204	1376.69	350.795	778.426	215.368
247430_at	basic helix-loop-helix (bHLH) family protein	AT5G62610	0.000115	0.001212	180.958	29.6307	99.1011	4.24722
253779_at	leucine-rich repeat transmembrane protein kinase, putative	AT4G28490	0.0001163	0.001224	292.735	101.005	142.724	22.4961
251459_at	expressed protein	AT3G60200	0.0001171	0.001231	41.8859	4.92964	22.6009	4.08747
251960_at	Ras-related GTP-binding protein, putative	AT3G53610	0.0001198	0.001253	25.6908	3.50246	14.3027	0.179165
261902_at	expressed protein	AT1G80860	0.0001206	0.001261	27.4434	7.8926	14.0009	1.2906
256244_at	sulfate transporter family protein	AT3G12520	0.0001208	0.001262	160.889	17.8452	84.8204	3.67059
263676_at	expressed protein	AT1G09340	0.0001227	0.001275	118.287	76.4437	38.3066	20.5791
247316_at	dehydration-responsive protein-related	AT5G64030	0.0001228	0.001275	141.144	22.1543	73.4165	2.67634
263750_at	forkhead-associated domain-containing protein / FHA domain-containing protein	AT2G21530	0.0001234	0.001279	6.6227	1.59381	4.04051	0.541974
245806_at	chlorophyll A-B binding protein, putative (LHCA5)	AT1G45474	0.000125	0.00129	553.312	148.144	297.075	70.2657
247331_at	copper chaperone (CCH)-related	AT5G63530	0.0001252	0.00129	930.656	340.552	485.457	101.457
267630_at	expressed protein	AT2G42130	0.0001252	0.00129	188.568	14.0951	115.617	9.91106
261913_at	flavin-containing monooxygenase family protein / FMO family protein	AT1G65860	0.0001264	0.001301	299.767	56.1259	151.346	59.4705
256433_at	wound-responsive protein-related	AT3G10985	0.0001279	0.001314	396.238	34.8264	234.836	52.2757
248591_at	xylulose kinase, putative	AT5G49650	0.000128	0.001314	62.4104	4.26747	33.6764	5.36875
244901_at	No description found		0.0001323	0.001353	8.66672	0.579932	5.73812	0.369332
260605_at	expressed protein	AT2G43780	0.0001332	0.001359	1013.7	58.3703	690.231	78.1569
261728_at	multi-copper oxidase type I family protein	AT1G76160	0.0001346	0.001369	14.7687	2.72029	7.92535	2.00171
259828_at	zinc finger (C3HC4-type RING finger) family protein	AT1G72220	0.0001356	0.001375	128.594	30.6583	60.6328	14.2221
266413_at	haloacid dehalogenase-like hydrolase family protein	AT2G38740	0.0001369	0.001387	393.459	147.945	164.246	68.019
265350_at	expressed protein	AT2G22620	0.0001383	0.001401	82.5329	22.4837	39.3644	10.2887
260350_at	eukaryotic translation initiation factor 5A, putative / eIF-5A, putative	AT1G69410	0.0001405	0.001415	6884.88	585.782	5153.83	135.053
259040_at	glutathione S-transferase, putative	AT3G09270	0.0001425	0.00143	109.442	6.21045	57.3158	22.0241
256336_at	GCN5-related N-acetyltransferase (GNAT) family protein	AT1G72030	0.0001521	0.00151	149.813	26.749	76.8426	20.2465
263236_at	two-component responsive regulator / response regulator 4 (ARR4)	AT1G10470	0.0001526	0.001514	251.389	43.4167	137.942	21.2866
255719_at	membrane protein, putative	AT1G32080	0.0001536	0.001521	197.92	85.2306	85.168	19.1978
251409_at	60S ribosomal protein L37a (RPL37aC)	AT3G60245	0.0001546	0.001528	2586.06	285.744	1794.53	196.623
255629_at	stress-related ozone-induced protein (OZI1) / stress-related ozone-responsive protein	AT4G00860	0.0001547	0.001528	1253.3	134.274	873.92	33.9812
248916_at	leucine-rich repeat transmembrane protein kinase, putative	AT5G45840	0.0001575	0.001549	16.8862	4.24172	9.45916	0.988068
252165_at	expressed protein	AT3G50550	0.0001575	0.001549	137.534	24.0875	71.4892	12.2669
262877_at	calcium-binding EF hand family protein	AT1G64850	0.0001578	0.00155	714.957	59.7004	451.433	98.0273
259909_at	expressed protein	AT1G60870	0.0001608	0.001575	46.2108	7.70688	23.2224	3.38696
264894_at	hydroxyproline-rich glycoprotein family protein	AT1G23040	0.0001612	0.001578	1298.34	55.7805	937.212	62.5423
260412_at	alpha-amylase, putative / 1,4-alpha-D-glucan glucanohydrolase, putative	AT1G69830	0.0001645	0.001604	21.1352	2.16715	11.8102	1.09943
259424_at	beta-1,3-glucanase-related	AT1G13830	0.0001656	0.001613	8.19752	0.52287	5.65598	0.141735
247657_at	gibberellin-regulated family protein	AT5G59845	0.0001657	0.001613	1217.63	320.038	731.183	138.489
254363_at	multi-copper oxidase type I family protein	AT4G22010	0.0001675	0.001626	6.11251	0.575184	4.2608	0.275296
256255_at	myb family transcription factor	AT3G11280	0.0001677	0.001628	19.7956	4.95172	10.5427	1.19293
266256_at	60S acidic ribosomal protein P2 (RPP2B)	AT2G27710	0.0001685	0.001631	1756.35	94.7288	1224.88	48.6049
247552_at	phytochelatin synthetase, putative / COBRA cell expansion protein COB, putative	AT5G60920	0.0001711	0.001649	318.716	54.5576	184.464	26.7029
258866_at	Got1-like family protein	AT3G03180	0.0001728	0.001664	63.2889	5.97524	36.4197	3.1704
255568_at	WRKY family transcription factor	AT4G01250	0.0001732	0.001667	74.0916	11.6586	39.3533	7.68953
260284_at	phosphoribulokinase/uridine kinase-related	AT1G80380	0.0001743	0.001673	829.462	108.136	540.664	32.8105
245346_at	beta-amylase (CT-BMY) / 1,4-alpha-D-glucan maltohydrolase	AT4G17090	0.0001752	0.001679	36.5606	9.26706	19.8377	3.6153
251869_at	expressed protein	AT3G54500	0.0001759	0.001682	875.119	168.171	557.963	47.7255
258075_at	homocysteine S-methyltransferase 1 (HMT-1)	AT3G25900	0.0001759	0.001682	32.6594	3.37825	17.5389	2.93063
245050_at	No description found		0.0001796	0.001712	530.717	329.904	154.753	108.05
254709_at	human Rev interacting-like family protein / hRIP family protein	AT4G17890	0.0001808	0.001718	276.24	19.5267	164.395	15.8655
259096_at	40S ribosomal protein S3A (RPS3aA)	AT3G04840	0.0001823	0.001729	696.038	27.8544	465.233	35.4814
246931_at	expressed protein	AT5G25170	0.0001833	0.001736	18.8924	3.06217	10.3951	2.52319
251576_at	meprin and TRAF homology domain-containing protein / MATH domain-containing protein	AT3G58200	0.0001909	0.001798	820.07	26.8407	564.911	38.3119
258607_at	thioredoxin, putative	AT3G02730	0.0001918	0.001804	142.75	81.1373	53.5426	12.8124
251635_at	endo-polygalacturonase (ADPG1)	AT3G57510	0.0001919	0.001804	12951.6	980.958	10230	1015.7
258037_at	4-coumarate--CoA ligase, putative / 4-coumaroyl-CoA synthase, putative (4CL)	AT3G21230	0.0001971	0.001847	37.1181	4.21127	21.0923	2.29439
265742_at	expressed protein	AT2G01290	0.0002006	0.001874	345.374	28.7882	214.237	12.8881
251737_at	40S ribosomal protein S26 (RPS26C)	AT3G56340	0.0002023	0.001887	349.467	32.1106	216.461	44.7876
249708_at	expressed protein	AT5G35660	0.0002029	0.00189	414.862	32.8767	256.516	47.6778
255891_at	expressed protein	AT1G17870	0.0002039	0.001895	41.7902	1.90174	23.8141	3.91661
249235_at	glycosyl hydrolase family 17 protein	AT5G42100	0.0002044	0.001898	33.5167	12.2264	16.574	1.23686
257794_at	expressed protein	AT3G27050	0.0002073	0.001918	28.7953	6.98091	14.674	3.84519
248512_at	protein transport protein SEC61 gamma subunit, putative	AT5G50460	0.0002075	0.001919	1485.37	202.595	999.447	169.991
255718_at	GCN5-related N-acetyltransferase (GNAT) family protein / nuclear shuttle interacting protein (NSI)	AT1G32070	0.0002094	0.001931	82.602	19.2523	42.7707	4.80206
252328_at	protein transport protein SEC61 gamma subunit, putative	AT3G48570	0.00021	0.001935	1115.6	149.167	772.134	25.4188
245756_at	oxidoreductase, 2OG-Fe(II) oxygenase family protein	AT1G35190	0.0002109	0.001938	2515.09	111.377	1795.08	89.2207
258456_at	protein kinase family protein	AT3G22420	0.0002124	0.001949	44.7531	8.25699	23.8425	0.829878
248919_at	GDSL-motif lipase/hydrolase family protein	AT5G45920	0.0002125	0.001949	37.0666	8.00518	20.4097	3.04027
260902_at	mutase family protein	AT1G21440	0.0002136	0.001956	1446.79	256.332	958.86	173.367
264318_at	beta-ketoacyl-CoA synthase, putative	AT1G04220	0.0002179	0.00199	107.514	26.3129	52.8983	13.993
261417_at	thioredoxin family protein	AT1G07700	0.0002225	0.002026	948.81	86.3298	644.789	94.5788
263988_at	agamous-like MADS box protein AGL5 / floral homeodomain transcription factor (AGL5)	AT2G42830	0.0002226	0.002026	222.445	14.1801	130.591	25.764
253282_at	CBS domain-containing protein	AT4G34120	0.000225	0.002039	586.168	58.9716	376.985	73.3989
252906_at	gamma-glutamyltranspeptidase family protein	AT4G39640	0.0002258	0.002042	35.2636	3.60371	20.207	4.30159
247025_at	zeaxanthin epoxidase (ZEP) (ABA1)	AT5G67030	0.0002284	0.00206	2883.63	243.106	2100.86	211.664
256249_at	26S proteasome non-ATPase regulatory subunit 7, putative / 26S proteasome regulatory subunit S12, putative / MOV34 protein, putative	AT3G11270	0.0002357	0.00211	277.149	23.1754	172.518	6.31054
258359_s_at	(S)-2-hydroxy-acid oxidase, peroxisomal, putative / glycolate oxidase, putative / short chain alpha-hydroxy acid oxidase, putative	AT3G14415 : AT3G14420	0.0002364	0.002112	1320.95	469.754	684.863	276.719
259403_at	D-3-phosphoglycerate dehydrogenase / 3-PGDH	AT1G17745	0.0002433	0.002162	1099.95	83.7106	772.981	98.7831
256209_at	electron transfer flavoprotein alpha subunit family protein	AT1G50940	0.0002446	0.002172	187.623	8.90419	113.085	23.7038
265245_at	expressed protein	AT2G43060	0.0002467	0.002183	253.291	56.3996	136.498	23.8957
263739_at	zinc finger (B-box type) family protein	AT2G21320	0.000248	0.002191	290.851	64.7926	164.026	21.9143
257824_at	auxin-responsive family protein	AT3G25290	0.0002483	0.002193	706.456	175.594	429.055	63.4413
247136_at	senescence-associated family protein	AT5G66170	0.0002538	0.002234	290.514	67.4039	155.334	44.404
251796_at	3-oxo-5-alpha-steroid 4-dehydrogenase family protein / steroid 5-alpha-reductase family protein	AT3G55360	0.000259	0.002266	52.3908	2.84547	29.3395	5.24691
249658_s_at	phosphoglycolate phosphatase, putative	AT5G36700 : AT5G36790	0.0002629	0.002294	113.444	74.9902	34.1696	26.8472
260153_at	esterase/lipase/thioesterase family protein	AT1G52760	0.0002646	0.002304	56.015	2.45714	30.8676	4.90949
245048_at	No description found		0.0002668	0.00232	111.126	82.7535	28.3492	9.5623
248830_at	YDG/SRA domain-containing protein	AT5G47150	0.0002672	0.00232	121.677	34.8486	60.778	5.31128
249191_at	O-methyltransferase N-terminus domain-containing protein	AT5G42760	0.0002681	0.002324	9.32337	3.91095	4.94692	0.296641
264078_at	beta-galactosidase, putative / lactase, putative	AT2G28470	0.0002724	0.002355	107.129	22.1968	58.2707	12.2303
257387_s_at	leucine-rich repeat protein kinase, putative	AT2G14440 : AT2G14510	0.0002731	0.00236	67.1231	35.1757	24.8828	6.34146
258622_at	DJ-1 family protein / protease-related	AT3G02720	0.000276	0.002383	373.058	39.8917	236.648	19.3024
248091_at	expressed protein	AT5G55120	0.0002764	0.002383	180.867	6.24047	109.101	4.62122
265943_at	cytidine deaminase (CDD) / cytidine aminohydrolase	AT2G19570	0.0002766	0.002383	3450.48	175.011	2588.64	139.268
248814_at	transcription factor jumonji (jmj) family protein	AT5G46910	0.0002836	0.002433	22.6254	4.46719	12.6913	1.44829
266709_at	signal peptide peptidase family protein	AT2G03120	0.0002849	0.00244	890.7	92.9568	613.181	40.7954
266599_at	expressed protein	AT2G46100	0.0002874	0.002459	1220.29	175.904	823.478	125.312
250894_s_at	GDSL-motif lipase/hydrolase family protein	AT5G03810 : AT5G03820	0.0002896	0.002474	19.6847	6.12752	10.3623	1.90322
256835_at	sulfate adenylyltransferase 1 / ATP-sulfurylase 1 (APS1)	AT3G22890	0.0002905	0.002478	4143.4	235.049	3070.49	133.87
259460_at	expressed protein	AT1G44000	0.0002905	0.002478	125.952	47.1419	58.8975	8.75549
265228_s_at	ATP synthase alpha chain, mitochondrial, putative	AT2G07698	0.0002909	0.002478	90.5049	3.20128	48.2025	6.59831
256892_at	oxidoreductase, 2OG-Fe(II) oxygenase family protein	AT3G19000	0.000291	0.002478	34.591	5.03228	19.6697	2.53985
261831_at	ADP-ribosylation factor, putative	AT1G10630	0.0002927	0.002486	190.006	31.6531	115.458	17.1553
251309_at	short-chain dehydrogenase/reductase (SDR) family protein	AT3G61220	0.0002937	0.002491	160.123	40.9614	82.4754	13.8725
261055_at	aspartyl protease family protein	AT1G01300	0.0002938	0.002491	70.6503	3.81149	39.0595	9.43953
254506_at	leucine-rich repeat transmembrane protein kinase, putative	AT4G20140	0.0002966	0.002511	14.7285	1.72416	8.64629	0.883128
245281_at	1-deoxy-D-xylulose 5-phosphate synthase, putative / 1-deoxyxylulose-5-phosphate synthase, putative / DXP-synthase, putative (DEF) (CLA1)	AT4G15560	0.000299	0.002528	47.1061	15.6642	22.731	2.04256
259504_at	pyrophosphate-energized vacuolar membrane proton pump / pyrophosphate-energized inorganic pyrophosphatase (AVP-3)	AT1G15690	0.0003021	0.002546	3469.24	123.114	2602.34	159.618
257104_at	ER lumen protein retaining receptor, putative / HDEL receptor, putative	AT3G25040	0.0003024	0.002547	127.194	17.3421	66.7642	8.41946
262344_at	respiratory burst oxidase protein F (RbohF) (RbohAp108) / NADPH oxidase	AT1G64060	0.000303	0.00255	50.139	4.66864	27.4613	2.08585
266035_at	enoyl-(acyl-carrier protein) reductase (NADH), chloroplast, putative / NADH-dependent enoyl-ACP reductase, putative	AT2G05990	0.0003058	0.00256	20.3238	6.05592	10.5057	1.53583
257801_at	protein kinase family protein	AT3G18750	0.0003101	0.002589	140.668	22.9965	77.2713	1.64045
265815_at	zinc finger (Ran-binding) family protein	AT2G17975	0.0003119	0.002603	15.5182	3.16839	8.72352	1.48244
247690_at	methyl-CpG-binding domain-containing protein	AT5G59800	0.0003134	0.002611	323.296	29.2613	204.731	18.4775
265374_at	membrane protein, putative	AT2G06510 : AT2G06520	0.000315	0.002623	966.078	384.261	528.173	35.9686
264850_at	pantothenate kinase-related	AT2G17340	0.0003161	0.002628	221.772	23.08	136.926	10.5582
247694_at	riboflavin biosynthesis protein, putative	AT5G59750	0.0003162	0.002628	34.829	6.52902	19.5789	2.58396
267112_at	adenylylsulfate kinase 1 (AKN1)	AT2G14750	0.0003177	0.002637	1638.07	244.643	1112.68	177.842
258432_at	rapid alkalinization factor (RALF) family protein	AT3G16570	0.0003189	0.002643	89.6865	28.3231	45.1239	9.26392
259965_at	transcription factor-related	AT1G53670	0.000322	0.002664	666.413	100.233	440.62	34.2629
250881_at	expressed protein	AT5G04080	0.0003287	0.002708	250.574	77.9078	124.088	47.1866
252250_at	expressed protein	AT3G49790	0.0003299	0.002714	86.9152	16.1185	48.1356	6.909
260774_at	serine/threonine protein kinase, putative	AT1G78290	0.0003299	0.002714	161.328	37.3336	83.4376	20.5667
252469_at	protein kinase family protein	AT3G46920	0.0003303	0.002715	102.581	30.8819	49.941	4.67859
258074_at	AP2 domain-containing transcription factor, putative	AT3G25890	0.0003304	0.002715	77.828	23.9108	40.0327	7.57457
247640_at	F-box family protein	AT5G60610	0.0003387	0.002769	42.1012	9.52017	22.9022	3.14542
253199_at	clathrin adaptor complex small chain family protein	AT4G35410	0.0003389	0.002769	9.91869	0.498956	6.73774	0.118671
265720_at	yippee family protein	AT2G40110	0.0003391	0.002769	820.47	65.5237	564.878	66.175
263064_at	bZIP transcription factor family protein	AT2G18160	0.0003428	0.002793	116.606	19.2971	62.46	16.1018
258314_at	Ras-related GTP-binding family protein	AT3G16100	0.0003431	0.002794	23.5981	2.90324	13.5534	0.707991
267302_at	ubiquitin family protein	AT2G30100	0.0003443	0.0028	225.405	12.8167	137.139	21.8745
262329_at	reticulon family protein (RTNLB3)	AT1G64090	0.0003449	0.0028	71.115	27.793	33.5472	1.61118
245228_at	phytochelatin synthetase family protein / COBRA cell expansion protein COBL2	AT3G29810	0.0003452	0.0028	672.16	184.488	399.817	57.6101
251218_at	CP12 domain-containing protein	AT3G62410	0.0003476	0.002814	109.004	60.1597	40.5703	8.78423
267005_at	flavin reductase-related	AT2G34460	0.0003508	0.002832	326.745	107.904	181.738	9.9301
245195_at	photosystem II core complex proteins psbY, chloroplast (PSBY) / L-arginine metabolising enzyme	AT1G67740	0.0003519	0.002838	686.381	182.769	418.597	63.532
259133_at	sugar transporter, putative	AT3G05400	0.0003538	0.002848	3862.74	131.266	2841.01	332.915
260014_at	glycerate dehydrogenase / NADH-dependent hydroxypyruvate reductase	AT1G68010	0.0003582	0.002881	165.998	119.831	54.3712	18.5799
252823_at	expressed protein	AT4G40045	0.0003602	0.002894	78.8521	18.4123	42.6295	8.76735
249806_at	expressed protein	AT5G23850	0.0003637	0.002915	391.231	76.703	233.772	15.9983
258090_at	60S ribosomal protein L18A (RPL18aC)	AT3G14600	0.0003686	0.002948	1056.01	94.7733	751.591	34.899
253688_at	expressed protein	AT4G29590	0.0003699	0.002957	153.407	38.4474	82.8572	7.02507
262519_at	pfkB-type carbohydrate kinase family protein	AT1G17160	0.0003716	0.002968	27.2297	2.53548	16.5237	1.47989
259018_at	auxin-responsive protein / auxin-induced protein (AIR12)	AT3G07390	0.0003733	0.002978	540.37	147.587	320.243	12.5712
264728_at	expressed protein	AT1G22850	0.0003745	0.002985	42.6897	14.0066	21.1324	1.74768
267038_at	integral membrane protein, putative	AT2G38480	0.0003766	0.002999	395.569	84.9808	235.369	19.9255
253206_at	farnesyl-diphosphate farnesyltransferase 1 / squalene synthase 1 (SQS1)	AT4G34640	0.0003804	0.003025	105.861	20.2512	53.2819	19.1718
247666_at	transcriptional factor B3 family protein	AT5G60140	0.0003811	0.003029	63.4555	5.09851	37.8118	2.05726
265898_at	senescence-associated protein-related	AT2G25690	0.0003822	0.003034	20.6436	2.72586	12.0229	0.543055
246580_at	ABC transporter family protein	AT1G31770	0.0003839	0.003045	10.74	2.28311	6.51915	1.37669
255720_at	phosphoribulokinase (PRK) / phosphopentokinase	AT1G32060	0.0003876	0.003067	112.67	83.319	31.2581	21.0606
261746_at	expressed protein	AT1G08380	0.0003882	0.003068	110.253	31.6048	56.8584	17.2727
263154_at	cation exchanger, putative (CAX10)	AT1G54110	0.0003996	0.00314	88.5854	10.7693	49.1967	4.49041
249733_at	glucosamine/galactosamine-6-phosphate isomerase family protein	AT5G24400	0.0004047	0.003172	216.294	9.60185	134.97	6.4761
255041_at	expressed protein	AT4G09620	0.000405	0.003172	265.993	48.5353	160.336	18.7742
264316_at	equilibrative nucleoside transporter family protein	AT1G70330	0.000412	0.003217	542.015	65.2138	364.815	12.7439
245947_at	spermine/spermidine synthase family protein	AT5G19530	0.0004191	0.003257	201.374	49.032	108.764	25.3163
253927_at	ATP synthase subunit H family protein	AT4G26710	0.00042	0.003259	884.069	232.137	562.968	49.699
266368_at	embryo-abundant protein-related	AT2G41380	0.000426	0.0033	636.24	34.6146	407.577	84.9642
266495_at	cycloartenol synthase (CAS1) / 2,3-epoxysqualene--cycloartenol cyclase / (S)-2,3-epoxysqualene mutase	AT2G07050	0.0004289	0.003316	90.7932	8.79971	48.9231	7.62397
254500_at	vacuolar sorting receptor, putative	AT4G20110	0.0004295	0.003319	29.5073	7.2958	16.2423	2.81707
254853_at	DNA-binding family protein	AT4G12080	0.0004308	0.003323	75.8318	4.74274	44.4821	6.994
267343_at	expressed protein	AT2G44260	0.0004338	0.003342	1963.78	165.088	1449.12	90.9448
258018_at	ethylene-responsive protein -related	AT3G19500	0.0004346	0.003346	12.2736	0.357124	8.16367	0.425751
254153_at	starch excess protein-related	AT4G24450	0.0004379	0.00337	97.7068	49.6415	36.2151	16.4517
255088_at	DNAJ heat shock N-terminal domain-containing protein	AT4G09350	0.0004408	0.003387	20.619	14.0972	7.769	0.780546
260644_at	galactosyltransferase family protein	AT1G53290	0.0004414	0.00339	9.55199	0.0570038	6.35527	0.801671
257807_at	glyceraldehyde 3-phosphate dehydrogenase A, chloroplast (GAPA) / NADP-dependent glyceraldehydephosphate dehydrogenase subunit A	AT3G26650	0.0004426	0.003395	1487.44	657.788	808.604	124.412
249393_at	disease resistance family protein	AT5G40170	0.0004498	0.003442	19.3129	3.22098	11.0159	2.28092
258264_at	methyl-CpG-binding domain-containing protein	AT3G15790	0.0004563	0.003483	629.479	121.692	387.357	74.6053
254040_at	aldose 1-epimerase family protein	AT4G25900	0.0004623	0.003525	158.333	41.4052	84.3553	4.08631
247585_at	expressed protein	AT5G60680	0.0004674	0.003559	885.819	90.6134	626.004	15.2829
264435_at	glutathione S-transferase, putative	AT1G10360	0.0004705	0.00358	10.3704	2.66658	6.4103	0.979251
255572_at	hydroxyproline-rich glycoprotein family protein	AT4G01050	0.0004734	0.003601	51.0709	20.5761	24.2984	2.66212
251784_at	photosystem II reaction center PsbP family protein	AT3G55330	0.0004751	0.00361	21.3225	6.44558	11.6787	0.990664
260730_at	dihydrolipoamide dehydrogenase 1, mitochondrial / lipoamide dehydrogenase 1 (MTLPD1)	AT1G48030	0.0004753	0.00361	698.729	17.2998	479.054	48.8152
255577_at	harpin-induced family protein / HIN1 family protein / harpin-responsive family protein	AT4G01410	0.0004763	0.003612	343.167	27.504	221.394	8.89938
267556_at	beta-galactosidase, putative / lactase, putative	AT2G32810	0.0004806	0.003634	60.2109	6.16323	35.4652	5.10811
254216_at	vacuolar ATP synthase subunit G 2 (VATG2) / V-ATPase G subunit 2 (VAG2) / vacuolar proton pump G subunit 2	AT4G23710	0.0004826	0.003645	217.923	28.1057	133.293	13.9726
253600_at	serine carboxypeptidase S10 family protein	AT4G30810	0.0004862	0.003663	19.4506	3.16741	11.4999	1.43953
250470_at	beta-hydroxyacyl-ACP dehydratase, putative	AT5G10160	0.0004967	0.003729	13.2417	0.781091	8.45442	0.831012
255457_at	photosystem I reaction center subunit II, chloroplast, putative / photosystem I 20 kDa subunit, putative / PSI-D, putative (PSAD1)	AT4G02770	0.0004967	0.003729	491.838	176.89	259.58	102.428
256888_at	expressed protein	AT3G15160	0.0004983	0.003736	9.99966	1.76299	6.53836	0.205753
258068_at	DNA-binding protein GT-1-related	AT3G25990	0.0004987	0.003736	7.33692	0.585976	5.29072	0.451881
249289_at	transferase family protein	AT5G41040	0.0004992	0.003737	898.162	106.183	599.254	133.388
266904_at	transketolase family protein	AT2G34590	0.0005033	0.003764	78.6016	5.3259	47.0076	5.98685
254970_at	chlorophyll A-B binding protein CP26, chloroplast / light-harvesting complex II protein 5 / LHCIIc (LHCB5)	AT4G10340	0.0005055	0.003775	228.422	141.949	87.9565	37.8617
254333_at	sterol desaturase family protein	AT4G22753	0.0005057	0.003775	470.053	39.855	307.858	35.7308
256294_at	early-responsive to dehydration protein-related / ERD protein-related	AT1G69450	0.0005065	0.00378	86.3252	2.11243	49.7622	3.59772
253919_at	expressed protein	AT4G27350	0.0005113	0.00381	482.839	53.2236	318.753	4.5698
252423_at	esterase/lipase/thioesterase family protein	AT3G47590	0.0005136	0.003818	23.4831	7.75189	11.8505	2.41512
255885_at	S-adenosyl-methionine-sterol-C-methyltransferase	AT1G20330	0.000514	0.003819	136.674	17.4403	81.9464	5.10002
250099_at	myb family transcription factor	AT5G17300	0.000516	0.003832	19.1087	4.13405	11.2293	1.0743
250851_at	kelch repeat-containing protein	AT5G04420	0.0005221	0.003864	13.781	1.59525	8.88733	0.565595
260956_at	zinc finger (B-box type) family protein / salt-tolerance protein (STO)	AT1G06040	0.000524	0.003874	1242.86	178.628	880.048	44.0816
262970_at	chaperone protein dnaJ-related	AT1G75690	0.0005257	0.003883	7.81342	1.40263	5.35837	0.182424
253038_at	homeobox-leucine zipper protein 22 (HAT22) / HD-ZIP protein 22	AT4G37790	0.0005314	0.003923	501.897	24.2397	331.083	20.8501
245014_at	No description found		0.0005329	0.003932	3875.57	947.692	2369.29	834.42
262160_at	expressed protein	AT1G52590	0.0005353	0.003943	404.554	138.712	226.333	26.3731
260056_at	methyltransferase-related	AT1G78140	0.0005371	0.003951	659.788	41.6088	458.461	24.7453
261519_at	ABC1 family protein	AT1G71810	0.0005397	0.003965	30.9455	6.59817	17.1663	1.23673
251230_at	glycosyl hydrolase family 1 protein	AT3G62750	0.0005419	0.003977	39.8269	2.75172	23.431	3.39438
246273_at	cupin family protein	AT4G36700	0.0005427	0.003981	2314.42	380.483	1614.51	177.91
267379_at	expressed protein	AT2G26340	0.0005451	0.003995	45.734	16.342	23.403	1.82291
252200_at	transferase family protein	AT3G50280	0.0005458	0.003995	13.8736	7.81675	6.57032	0.148791
262138_at	disease resistance protein, putative	AT1G52660	0.0005458	0.003995	58.5601	5.31808	32.8766	8.64415
258161_at	expressed protein	AT3G17930	0.000546	0.003995	471.312	62.5212	313.62	20.788
262736_at	GDSL-motif lipase, putative	AT1G28570	0.0005553	0.004059	82.9544	38.5724	35.1252	19.1525
245483_at	cysteine proteinase, putative	AT4G16190	0.0005571	0.004069	9048.88	698.697	7171.21	606.587
265094_at	cupin family protein	AT1G03890	0.0005584	0.004074	14700.6	353.839	12250.9	802.172
252123_at	naringenin 3-dioxygenase / flavanone 3-hydroxylase (F3H)	AT3G51240	0.0005631	0.004104	541.508	231.419	277.228	12.3731
256328_at	6-phosphogluconate dehydrogenase family protein	AT3G02360	0.0005641	0.004109	1430.73	126.747	1040.56	50.9784
253738_at	photosystem I reaction center subunit IV, chloroplast, putative / PSI-E, putative (PSAE1)	AT4G28750	0.0005723	0.004161	993.151	310.191	617.05	116.839
257299_at	nodulin MtN21 family protein	AT3G28050	0.0005726	0.004161	948.914	122.652	662.565	58.9512
245697_at	latex-abundant protein, putative (AMC9) / caspase family protein	AT5G04200	0.0005747	0.004174	837.565	156.706	572.119	42.515
253203_at	arginine decarboxylase 2 (SPE2)	AT4G34710	0.0005772	0.00419	1743.16	289.754	1214.22	20.8277
262857_at	major latex protein-related / MLP-related	AT1G14930	0.0005786	0.004197	4277.08	575.764	3084.06	296.05
255061_at	thioredoxin-related	AT4G08930	0.000587	0.004246	219.822	5.7146	139.844	29.8853
259653_at	expressed protein	AT1G55240	0.000587	0.004246	11.4257	2.80123	6.80369	0.635501
261218_at	ferredoxin--NADP(+) reductase, putative / adrenodoxin reductase, putative	AT1G20020	0.0005873	0.004246	75.0625	25.1143	37.6068	13.9453
267483_at	UDP-galactose/UDP-glucose transporter	AT2G02810	0.0005927	0.004277	110.726	21.101	61.5179	19.7995
266391_at	strictosidine synthase family protein	AT2G41290	0.000593	0.004277	100.667	19.0444	55.9501	6.21105
257568_s_at	F-box family protein	AT3G23950 : AT3G23970	0.0005934	0.004278	14.8461	2.54894	8.86883	1.34955
251141_at	expressed protein	AT5G01075	0.0005942	0.004281	8.13542	2.57236	5.06599	0.597076
256114_at	expressed protein	AT1G16850	0.0005969	0.00429	2777.53	379.266	2043.26	101.305
266963_at	cation efflux family protein	AT2G39450	0.0006009	0.004312	16.9821	6.56408	9.31981	1.0589
263330_at	leucine-rich repeat family protein	AT2G15320	0.0006049	0.004333	16.5204	2.5798	10.1559	1.55092
247340_at	zinc finger (C3HC4 type RING finger) family protein	AT5G63700	0.0006056	0.004333	18.8902	8.15441	9.46562	1.00777
262473_at	cell division protein ftsH homolog 1, chloroplast (FTSH1) (FTSH)	AT1G50250	0.000607	0.004339	1141.93	320.047	724.224	94.978
267414_at	FAD-binding domain-containing protein	AT2G34790	0.0006123	0.004361	383.52	66.6387	240.485	19.7293
266695_at	zinc finger (CCCH-type) family protein	AT2G19810	0.0006127	0.004362	46.9636	12.166	24.9092	3.21429
251246_at	auxin-responsive protein, putative	AT3G62100	0.0006209	0.00441	48.7195	11.6828	25.8973	2.49828
257954_at	UDP-glucoronosyl/UDP-glucosyl transferase family protein	AT3G21760	0.0006256	0.004441	97.6893	17.6483	54.1938	8.60825
258287_at	sulfate transporter, putative	AT3G15990	0.0006282	0.004457	12.5657	3.78321	7.62263	0.538142
254862_at	bile acid:sodium symporter family protein	AT4G12030	0.0006336	0.00449	61.8317	7.32628	35.5639	10.2584
250993_at	synbindin, putative	AT5G02280	0.0006396	0.004528	108.238	13.551	65.4291	2.60639
254687_at	cytochrome P450 family protein	AT4G13770	0.0006436	0.004548	3034.89	708.094	2037.87	342.817
262875_at	expressed protein	AT1G64970	0.0006464	0.004566	323.785	103.945	173.455	49.6767
253427_at	phosphate translocator-related	AT4G32390	0.0006507	0.004586	222.75	5.55305	141.292	26.5019
254920_at	reticulon family protein (RTNLB2)	AT4G11220	0.000653	0.004594	1277.77	102.151	943.57	66.2658
256359_at	protein kinase family protein	AT1G66460	0.0006579	0.004618	74.4927	16.8696	40.1259	12.0863
253118_at	Rac-like GTP-binding protein (ARAC6)	AT4G35950	0.000661	0.004638	36.3274	6.70001	21.9855	2.44189
256168_at	leucine-rich repeat protein kinase, putative	AT1G51805	0.0006638	0.004654	414.412	119.178	238.659	56.7757
249875_at	photosystem II stability/assembly factor, chloroplast (HCF136)	AT5G23120	0.0006729	0.0047	76.6393	22.2709	41.067	6.70224
259730_at	MORN (Membrane Occupation and Recognition Nexus) repeat-containing protein /phosphatidylinositol-4-phosphate 5-kinase-related	AT1G77660	0.0006838	0.004752	12.1013	1.36107	8.08232	0.530701
250073_at	rubredoxin family protein	AT5G17170	0.0006903	0.004782	299.444	89.9836	167.831	17.4509
265390_at	expressed protein	AT2G20820	0.000702	0.004844	1048.66	64.6146	761.692	57.7662
254232_at	coronatine-responsive tyrosine aminotransferase / tyrosine transaminase	AT4G23600	0.0007036	0.004852	310.897	106.432	166.861	47.7133
247494_at	calnexin 1 (CNX1)	AT5G61790	0.0007044	0.004855	599.089	74.8432	416.825	29.3716
246531_at	developmental protein SEPALLATA1 / floral homeotic protein (AGL2) (SEP1)	AT5G15800	0.0007166	0.004926	836.781	85.0755	596.623	55.5295
264436_at	glutathione S-transferase, putative (ERD9)	AT1G10370	0.0007183	0.004932	152.102	25.1543	91.3324	10.5798
258873_at	esterase/lipase/thioesterase family protein	AT3G03240	0.0007259	0.004976	227.525	31.1357	142.561	15.3678
260002_at	ABC transporter family protein	AT1G67940	0.0007259	0.004976	12.9873	4.79639	7.50377	0.44581
252652_at	prephenate dehydratase family protein	AT3G44720	0.0007276	0.004982	7.10017	1.37527	4.90232	0.347936
244953_s_at	pseudogene, similar to NADH-ubiquinone oxidoreductase chain 6 (EC 1.6.5.3). (Field mustard)	AT2G07731	0.0007392	0.00505	10.6214	1.00336	7.25509	0.991043
267413_at	amino acid permease family protein	AT2G34960	0.0007438	0.005068	25.2691	8.39654	13.2854	2.22745
263120_at	cytochrome P450 family protein	AT1G78490	0.0007471	0.005085	14.3464	3.25419	8.62712	0.246546
247467_at	Per1-like protein-related	AT5G62130	0.0007491	0.005093	235.316	41.4151	143.309	16.9305
259687_at	cell division cycle protein-related	AT1G63110	0.0007533	0.005116	15.631	1.38841	9.82596	1.04228
256598_at	cytochrome P450, putative	AT3G30180	0.0007572	0.00514	26.9172	7.73201	14.4665	4.21802
248761_at	expressed protein	AT5G47635	0.0007731	0.005212	20.6076	7.62718	11.004	1.05313
247359_at	transferase family protein	AT5G63560	0.0007755	0.005222	53.4722	31.6459	18.2801	2.18985
261114_at	bZIP transcription factor family protein	AT1G75390	0.0007755	0.005222	355.938	40.6172	240.572	31.8658
262632_at	photosystem II oxygen-evolving complex 23 (OEC23)	AT1G06680	0.0007777	0.005234	580.502	244.202	320.473	58.59
245321_at	expressed protein	AT4G15545 : AT4G15550	0.0007829	0.005257	1177.94	143.5	838.912	102.323
251661_at	small basic membrane integral family protein	AT3G56950	0.0007995	0.005352	425.882	80.3725	267.077	34.076
255766_at	expressed protein	AT1G16750	0.0008023	0.005359	13.9979	3.19576	8.50517	0.971403
248331_at	40S ribosomal protein S10 (RPS10C)	AT5G52650	0.0008047	0.005372	409.378	27.901	283.537	13.8696
256093_at	zinc finger (C3HC4-type RING finger) family protein	AT1G20823	0.0008146	0.005411	208.962	30.0222	129.274	16.603
254806_at	trehalose-6-phosphate phosphatase, putative	AT4G12430	0.0008148	0.005411	12.7321	0.714794	8.60479	0.714589
256216_at	calreticulin 1 (CRT1)	AT1G56340	0.0008178	0.005428	439.864	51.3648	286.396	32.6201
266192_at	expressed protein	AT2G39080	0.0008219	0.005442	108.52	24.9923	64.1769	6.40971
259014_at	glycosyl hydrolase family 17 protein	AT3G07320	0.0008233	0.005445	8.81983	3.76595	5.12417	0.50824
249752_at	expressed protein	AT5G24660	0.0008321	0.005486	1955.15	309.966	1346.52	284.239
245740_at	amino acid permease 5, putative (AAP5)	AT1G44100	0.0008361	0.005508	747.177	121.181	515.265	38.538
266813_at	thylakoid lumenal 15 kDa protein, chloroplast	AT2G44920	0.0008364	0.005508	31.3768	3.00978	18.7046	4.19963
256997_at	subtilase family protein	AT3G14067	0.0008378	0.005515	911.522	273.216	549.956	42.2986
250057_at	chaperone protein dnaJ-related	AT5G17840	0.0008401	0.005526	49.8466	4.81067	28.418	1.77466
248167_at	expressed protein	AT5G54530	0.000841	0.00553	16.2484	2.55701	10.349	0.545051
245143_at	expressed protein	AT2G45450	0.0008431	0.005541	19.9572	5.26236	11.5175	0.803275
245795_at	expressed protein	AT1G32160	0.0008478	0.005563	628.084	97.7166	398.086	102.958
256411_at	ATP-dependent Clp protease proteolytic subunit (ClpP3)	AT1G66670	0.0008529	0.005587	3269.47	207.58	2477.1	326.354
265033_at	chlorophyll A-B binding protein / LHCI type III (LHCA3.1)	AT1G61520	0.0008564	0.005604	1475.63	418.678	954.061	222.017
245427_at	transporter-related	AT4G17550	0.0008625	0.005626	418.094	98.2584	259.926	33.6368
244973_at	No description found		0.0008667	0.005642	21.7858	18.8945	5.09939	1.76764
250978_at	phosphatidic acid phosphatase-related / PAP2-related	AT5G03080	0.0008694	0.005654	687.676	76.4539	479.233	50.4079
265698_at	expressed protein	AT2G32160	0.0008889	0.005772	1092.8	196.325	736.606	153.879
247262_at	amidase family protein	AT5G64440	0.0009016	0.005837	70.741	14.7261	39.5964	6.6498
266398_at	pyrimidine 5'-nucleotidase family protein / uridine monophosphate hydrolase-1 (UMPH-1) family protein	AT2G38680	0.0009134	0.005894	9.68686	0.153796	6.82141	0.41532
244912_at	pseudogene, similar to Ccl1	AT2G07783	0.0009179	0.005915	71.0068	61.3549	15.3887	9.48606
248026_at	expressed protein	AT5G55700 : AT5G55710	0.0009318	0.005976	24.3061	5.23959	14.464	1.03954
252414_at	glycerol-3-phosphate transporter, putative / glycerol 3-phosphate permease, putative	AT3G47420	0.0009328	0.00598	1698.7	407.71	1068.53	333.021
260955_at	UDP-glucoronosyl/UDP-glucosyl transferase family protein	AT1G06000	0.0009333	0.00598	433.709	93.3952	276.717	7.33346
251892_at	ovule development protein, putative	AT3G54320	0.0009431	0.006032	12.9709	2.06168	8.44184	0.95532
252073_at	expressed protein	AT3G51750	0.0009433	0.006032	173.067	5.97539	105.478	26.2273
255529_at	CTP synthase, putative / UTP--ammonia ligase, putative	AT4G02120	0.0009461	0.006047	27.2625	4.26851	16.6153	2.91832
247637_at	1-hydroxy-2-methyl-2-(E)-butenyl 4-diphosphate synthase, putative / GcpE family protein	AT5G60600	0.0009732	0.006191	1122.01	254.486	771.938	53.0134
249922_at	auxin/aluminum-responsive protein, putative	AT5G19140	0.0009813	0.006235	4148.33	189.637	3096.67	480.809
266225_at	mitochondrial import inner membrane translocase subunit Tim17/Tim22/Tim23 family protein	AT2G28900	0.0009872	0.006265	264.634	31.5656	169.279	11.392
257933_at	aminoalcoholphosphotransferase, putative	AT3G25585	0.0009879	0.006265	714.919	103.332	492.465	33.1382
248769_at	SEC14 cytosolic factor, putative / polyphosphoinositide-binding protein, putative	AT5G47730	0.000992	0.006283	32.6077	5.94468	19.1818	2.58015
256266_at	expressed protein	AT3G12320	0.001	0.006332	1068.37	13.5963	807.97	15.9201
258357_at	leucine-rich repeat transmembrane protein kinase, putative	AT3G14350	0.001012	0.006388	26.4918	3.56566	16.4126	2.33787
263421_at	phosphate-responsive 1 family protein	AT2G17230	0.001014	0.006394	56.237	11.8384	32.2729	3.99169
248335_at	MATE efflux protein-related	AT5G52450	0.001021	0.006428	710.137	98.228	491.155	35.178
252409_at	bundle-sheath defective protein 2 family / bsd2 family	AT3G47650	0.001023	0.006435	20.0175	7.4056	10.976	0.419811
249091_at	chlorophyllase (CLH2)	AT5G43860	0.001027	0.006456	5.70412	1.17738	4.15313	0.285482
253930_at	embryo-specific protein 1 (ATS1)	AT4G26740	0.001043	0.00653	11886.3	247.81	10010.1	220.467
260550_at	3-beta hydroxysteroid dehydrogenase/isomerase family protein	AT2G43410 : AT2G43420	0.001046	0.006544	86.3033	5.5373	52.2408	6.05486
249482_at	expressed protein	AT5G38980	0.001051	0.006573	19.325	14.9524	6.95478	0.521135
266892_at	glycine dehydrogenase (decarboxylating), putative / glycine decarboxylase, putative / glycine cleavage system P-protein, putative	AT2G26080	0.00106	0.006611	360.743	167.717	174.75	9.585
267235_at	expressed protein	AT2G43945	0.001064	0.006626	8.32645	0.720694	5.96854	0.709045
258338_at	L-asparaginase, putative / L-asparagine amidohydrolase, putative	AT3G16150	0.001068	0.006647	22.0287	6.11992	12.8078	1.02913
251205_at	glutathione peroxidase, putative	AT3G63080	0.00108	0.006715	346.763	35.7887	229.545	33.5659
260496_at	ABC transporter family protein	AT2G41700	0.001092	0.006778	89.8895	26.4785	47.7618	8.95828
255984_at	inositol polyphosphate 5-phosphatase I (IP5PI)	AT1G34120	0.001093	0.006779	25.5793	4.55203	15.6381	1.34645
253190_at	nucleotide-sugar transporter family protein		0.001094	0.006779	11.0349	2.01863	7.26861	0.888569
247041_at	AP2 domain-containing transcription factor, putative	AT5G67180	0.001095	0.006783	32.856	9.9988	17.81	5.41562
261076_at	sterol 4-alpha-methyl-oxidase 2 (SMO2)	AT1G07420	0.001095	0.006783	368.617	61.9767	247.636	19.4196
248467_at	nodulin MtN3 family protein	AT5G50800	0.001104	0.006831	231.919	131.306	109.14	24.001
250335_at	hydrolase, alpha/beta fold family protein	AT5G11650	0.001106	0.006836	398.943	62.6524	256.574	45.209
245148_at	pectinesterase family protein	AT2G45220	0.001107	0.006836	789.648	344.351	429.162	74.4944
258814_at	short-chain dehydrogenase/reductase (SDR) family protein	AT3G03980	0.001122	0.00692	4.63423	0.241617	3.62926	0.261738
255440_at	chloroplast thylakoid lumen protein	AT4G02530	0.001124	0.006925	15.0001	4.67786	8.62592	0.423047
265694_at	expressed protein	AT2G24440	0.001128	0.006943	58.8102	6.40942	34.5198	7.29862
259105_at	rubber elongation factor (REF) family protein	AT3G05500	0.001129	0.006946	4725.41	396.243	3629.37	90.6177
252348_at	senescence-associated protein, putative	AT3G48140	0.001133	0.006959	3548.24	434.023	2672.63	114.041
258122_at	glycosyl transferase family 48 protein	AT3G14570	0.00115	0.007043	30.1199	2.99909	17.774	3.71212
260840_at	expressed protein	AT1G29050	0.001152	0.007057	18.0551	7.60044	9.78282	0.474907
255298_at	methionine sulfoxide reductase domain-containing protein / SeIR domain-containing protein	AT4G04840	0.001153	0.007058	3679.34	580.243	2706.78	280.172
247075_at	expressed protein	AT5G66410	0.001156	0.007069	154.603	25.2514	93.1392	19.2594
267092_at	amino acid permease, putative (AUX1)	AT2G38120	0.001157	0.007069	12.83	1.08755	8.92889	0.516657
252898_at	cytochrome P450, putative	AT4G39500	0.001164	0.007101	29.6372	2.77829	18.3299	1.73736
261385_at	protease inhibitor/seed storage/lipid transfer protein (LTP)-related	AT1G05450	0.001172	0.007146	194.888	93.1674	97.3289	18.4362
255310_at	amidohydrolase family protein	AT4G04955	0.001173	0.007147	626.974	91.5969	418.895	71.0346
263574_at	expressed protein	AT2G16990	0.001178	0.007166	7.19664	0.891843	5.23025	0.567666
261197_at	glyceraldehyde 3-phosphate dehydrogenase, chloroplast, putative / NADP-dependent glyceraldehydephosphate dehydrogenase, putative	AT1G12900	0.001179	0.007166	130.187	73.093	56.6677	15.9004
245019_at	No description found		0.001182	0.007175	25.1775	15.3434	10.7565	1.92503
266942_at	expressed protein	AT2G18990	0.001184	0.007185	25.8648	2.51876	16.6295	1.39766
261481_at	zinc finger (C3HC4-type RING finger) family protein	AT1G14260	0.001195	0.007243	7.97489	0.876649	5.68475	0.727828
249753_at	expressed protein	AT5G24610	0.001197	0.00725	45.9112	5.48658	26.5273	1.12193
266719_at	myb-related transcription factor (CCA1)	AT2G46830	0.001204	0.007285	765.106	168.902	515.398	51.2382
247544_at	expressed protein	AT5G61670	0.001215	0.00734	708.923	44.3008	492.092	90.1396
262745_at	lipase, putative	AT1G28600	0.00122	0.00736	1494.91	384.171	998.964	157.664
248624_at	expressed protein	AT5G48790	0.001223	0.007378	181.911	9.06392	116.797	17.3671
254595_at	floral homeotic protein AGAMOUS (AG)	AT4G18960	0.001227	0.007397	227.706	75.8293	129.985	26.164
266716_at	expressed protein	AT2G46820	0.00123	0.007412	237.951	98.356	123.659	41.4753
246778_at	mevalonate kinase (MK)	AT5G27450	0.001235	0.007438	22.5348	2.01916	13.9442	0.987305
258556_at	UDP-glucose:sterol glucosyltransferase (UGT80A2)	AT3G07020	0.001235	0.007438	128.358	15.1649	76.4999	5.54419
253246_at	expressed protein	AT4G34600	0.001238	0.007448	48.9773	25.1138	22.7136	0.56883
261933_at	2-dehydro-3-deoxyphosphoheptonate aldolase, putative / 3-deoxy-D-arabino-heptulosonate 7-phosphate synthase, putative / DAHP synthetase, putative	AT1G22410	0.00124	0.007452	686.648	81.5352	482.037	25.0529
261639_at	tubulin alpha-2/alpha-4 chain (TUA4)	AT1G50010	0.001248	0.007494	26.7233	3.57232	16.3568	3.1077
251921_at	40S ribosomal protein S21 (RPS21B)	AT3G53890	0.001252	0.007508	486.845	104.241	308.487	71.9607
246998_at	expressed protein	AT5G67370	0.001261	0.007554	136.496	33.7007	77.5431	13.7005
263231_at	UDP-glucoronosyl/UDP-glucosyl transferase family protein	AT1G05680	0.001268	0.007584	1309.29	314.322	899.979	62.2952
259184_at	universal stress protein (USP) family protein	AT3G01520	0.001278	0.007637	1230.5	48.1622	927.636	43.8693
256875_at	cytochrome P450 family protein	AT3G26330	0.00128	0.007651	64.6494	7.32539	40.5827	2.67131
261336_at	ChaC-like family protein	AT1G44790	0.001286	0.007672	32.4662	8.59902	19.0505	1.83552
261167_at	thioredoxin family protein	AT1G04980	0.00129	0.007684	52.6878	0.335223	31.8311	4.76319
251192_at	galactosyl transferase GMA12/MNN10 family protein	AT3G62720	0.001291	0.007689	49.4417	6.82304	28.5686	3.86792
247902_at	ATPase 3, plasma membrane-type / proton pump 3	AT5G57350	0.001308	0.007783	747.693	277.054	440.869	52.6799
256342_at	expressed protein	AT1G72020	0.001312	0.007804	1284.39	81.866	974.436	44.7785
253827_at	expressed protein	AT4G28085	0.001314	0.007811	2444.06	294.267	1803.45	139.4
263074_at	high mobility group protein gamma (HMGgamma) / HMG protein gamma	AT2G17560	0.001326	0.007859	86.7345	3.79232	52.6681	7.04328
261740_at	expressed protein	AT1G47740	0.001331	0.007881	28.0719	5.31384	17.2213	1.61457
258398_at	thioredoxin M-type 4, chloroplast (TRX-M4)	AT3G15360	0.001343	0.007932	630.476	177.012	375.849	108.131
259904_at	kelch repeat-containing protein	AT1G74150	0.001344	0.007932	8.96858	1.8723	6.07286	0.19915
253300_at	carbonic anhydrase family protein / carbonate dehydratase family protein	AT4G33580	0.001348	0.007945	212.706	21.5218	141.265	3.07122
257949_at	UDP-glucoronosyl/UDP-glucosyl transferase family protein	AT3G21750	0.001348	0.007945	162.178	65.7342	85.7035	2.98019
262292_at	expressed protein	AT1G27595	0.001349	0.007945	20.5085	7.1147	11.1244	0.741332
263987_at	lipase, putative	AT2G42690	0.001349	0.007945	18.7176	7.07709	9.87749	2.05751
256160_at	pyruvate dehydrogenase E1 component beta subunit, chloroplast	AT1G30120	0.00135	0.007945	135.342	40.638	73.0949	19.4801
266143_at	hydrophobic protein, putative / low temperature and salt responsive protein, putative	AT2G38905	0.001355	0.007972	6465.72	194.065	5167.56	193.581
259421_at	leucine-rich repeat family protein	AT1G13910	0.001367	0.008029	100.808	12.1861	60.8899	8.10181
253607_at	small nuclear ribonucleoprotein E, putative / snRNP-E, putative / Sm protein E, putative	AT4G30330	0.001386	0.008114	28.4558	2.83499	17.4279	2.89127
266073_at	expressed protein	AT2G18770	0.001391	0.008134	57.0555	2.27806	33.6076	7.95708
267326_at	RNA recognition motif (RRM)-containing protein	AT2G19380	0.001393	0.008135	8.98805	1.51296	6.24459	0.297808
261118_at	ATP-dependent protease La (LON) domain-containing protein	AT1G75460	0.001416	0.008256	337.692	115.453	177.678	70.9416
257800_at	expressed protein	AT3G15900	0.001422	0.008284	96.6758	18.586	58.4662	6.92611
257275_at	RNA-binding protein, putative	AT3G14450	0.001423	0.008289	25.7134	2.75226	16.5487	1.60826
253096_at	cytochrome P450 family protein	AT4G37330	0.001424	0.008289	91.3038	39.4155	42.9109	10.5828
251325_s_at	chlorophyll A-B binding protein, chloroplast, putative / LHCI type II CAB, putative	AT3G61470 : AT5G28450	0.001434	0.008329	745.555	234.541	462.327	119.896
251539_at	protein kinase family protein	AT3G58690	0.001436	0.008338	12.6263	0.674356	8.79179	0.912807
266521_at	expressed protein	AT2G24020	0.001441	0.008361	202.297	14.7163	131.309	19.7513
267066_at	methyltransferase-related	AT2G41040	0.001458	0.008446	84.4333	26.0407	46.5122	7.6158
255840_at	expressed protein	AT2G33520	0.001465	0.008474	6797.39	161.312	5414.58	493.204
261352_at	DNA repair protein RAD23, putative	AT1G79650	0.001468	0.008485	64.588	19.717	36.2701	4.23659
265605_at	cellulose synthase, catalytic subunit, putative	AT2G25540	0.001468	0.008485	16.1873	5.95096	9.14111	1.28696
262448_at	transducin family protein / WD-40 repeat family protein	AT1G49450	0.00148	0.008537	26.4284	1.42087	16.9337	4.07454
255982_at	light stress-responsive one-helix protein (OHP2)	AT1G34000	0.001495	0.008601	1024.06	239.894	709.217	27.5378
264004_at	expressed protein	AT2G22425	0.001502	0.008633	305.681	34.5363	208.153	19.3176
255364_s_at	plastid-lipid associated protein PAP, putative	AT4G04020 : AT4G22240	0.001518	0.008704	4652.18	542.495	3459.66	471.161
250895_at	40S ribosomal protein S28 (RPS28B)	AT5G03850	0.00153	0.008754	1086.02	140.274	802.962	54.898
265170_at	carbonic anhydrase, putative / carbonate dehydratase, putative	AT1G23730	0.001547	0.008834	9.78061	0.707598	6.95701	0.747506
258588_s_at	glyceraldehyde-3-phosphate dehydrogenase, cytosolic (GAPC) / NAD-dependent glyceraldehyde-3-phosphate dehydrogenase	AT3G04120	0.001548	0.008836	1143.99	256.864	809.139	54.9067
253375_at	transcriptional factor B3 family protein	AT4G33280	0.001563	0.008914	38.8603	7.09386	23.8224	2.92508
258081_at	CAAX amino terminal protease family protein	AT3G26085	0.001564	0.008915	58.8585	7.08102	35.6075	2.61789
261865_at	7-dehydrocholesterol reductase / 7-DHC reductase / sterol delta-7-reductase (ST7R) / dwarf5 protein (DWF5)	AT1G50430	0.001564	0.008915	16.2325	3.27499	10.4332	0.631658
257700_at	LEM3 (ligand-effect modulator 3) family protein / CDC50 family protein	AT3G12740	0.001566	0.008918	1485.61	58.1532	1126.03	127.315
261713_at	basic helix-loop-helix (bHLH) protein (RAP-1)	AT1G32640	0.001578	0.008978	93.9127	15.2862	57.0924	8.38174
258962_at	cytochrome P450, putative	AT3G10570	0.001581	0.008983	31.5714	3.38161	19.8703	0.774002
263632_at	expressed protein	AT2G04795	0.001588	0.009015	15.2593	3.71063	9.35486	1.06811
245394_at	expressed protein	AT4G16450	0.001593	0.009035	1242.81	84.699	942.329	38.6198
259985_at	expressed protein	AT1G76620	0.001605	0.009086	5.88626	1.35633	4.20357	0.36813
259228_at	kelch repeat-containing protein	AT3G07720	0.00162	0.009161	472.662	34.4694	332.857	27.0804
257966_at	expressed protein	AT3G19800	0.001626	0.009188	156.663	72.2765	75.8921	12.9919
249035_at	myb family transcription factor (GLK2)	AT5G44190	0.001633	0.009216	23.5115	3.8074	14.4592	1.77469
245088_at	subtilase family protein	AT2G39850	0.001648	0.009281	93.188	32.4187	48.467	16.2583
248664_at	FK506-binding protein 2-2 (FKBP15-2) / immunophilin / peptidyl-prolyl cis-trans isomerase / rotamase	AT5G48580	0.001652	0.009295	87.42	24.3413	49.6423	2.89085
255714_at	fringe-related protein	AT4G00300	0.001687	0.009457	112.673	11.8418	70.0132	4.69192
264144_at	latex abundant protein, putative (AMC5) / caspase family protein	AT1G79320	0.00169	0.009464	7.18548	0.685532	5.3452	0.482033
258483_at	phosphomannose isomerase type I family protein	AT3G02570	0.001692	0.009473	573.132	58.3241	414.489	5.71325
253494_at	expressed protein	AT4G31830	0.001706	0.009538	4670.93	257.23	3590.69	414.002
262634_at	aldo/keto reductase family protein	AT1G06690	0.001717	0.009582	49.6819	15.0585	26.585	8.92329
255886_at	plastocyanin	AT1G20340	0.001718	0.009584	193.57	108.595	86.3107	18.5976
248449_at	expressed protein	AT5G51110	0.001723	0.009609	33.0044	13.3776	17.6729	4.37869
259275_at	expressed protein	AT3G01060	0.001728	0.009628	280.335	50.2759	174.764	46.2167
255721_at	expressed protein	AT1G31940	0.001743	0.009702	306.286	71.5619	192.267	32.2681
248748_at	adenylate kinase, chloroplast, putative / ATP-AMP transphosphorylase, putative	AT5G47840	0.001748	0.009723	194.211	33.9297	124.58	4.93071
248781_at	expressed protein	AT5G47870	0.00175	0.009728	67.026	14.9043	40.1852	6.55968
259325_at	expressed protein	AT3G05320	0.001753	0.009731	31.2848	5.18963	18.9554	1.70815
255690_at	cytochrome P450, putative	AT4G00360	0.001756	0.009746	34.3417	7.23388	20.6278	2.44864
255997_s_at	chlorophyll A-B binding protein 165/180, chloroplast / LHCII type I CAB-165/180	AT1G29910 : AT1G29920 : AT1G29930	0.001758	0.009753	896.714	254.397	552.059	239.35
251646_at	expressed protein	AT3G57780	0.001759	0.009753	16.3734	5.34686	9.60151	0.523958
249366_at	glycerol-3-phosphate dehydrogenase (NAD+) / GPDH	AT5G40610	0.001761	0.00976	43.1086	6.95873	26.3962	0.808316
253904_at	2S seed storage protein 1 / 2S albumin storage protein / NWMU1-2S albumin 1	AT4G27140	0.001766	0.009781	30934.9	289.467	26983	827.195
258470_at	expressed protein	AT3G06035	0.001772	0.009807	9.70711	2.13467	6.48072	0.333686
253006_at	amino acid transporter family protein	AT4G38250	0.001781	0.00985	259.946	48.0734	168.464	5.15953
261648_at	zinc finger (C2H2 type) family protein (ZAT10) / salt-tolerance zinc finger protein (STZ)	AT1G27730	0.001793	0.009911	3749.62	677.11	2785.42	204.124
265741_at	ABC transporter family protein	AT2G01320	0.001806	0.009965	29.1718	10.0466	16.0714	2.52175
261428_at	isochorismate synthase, putative / isochorismate mutase, putative	AT1G18870	0.001809	0.009975	376.286	81.5181	187.185	114.307

## Sheet: hub1-2_UP
Differentially upregulated genes in hub1-2 compared to Ler
See manuscript text for details
Affymetrix					Ler	Ler	rdo2-1	rdo2-1
probe identifier	Gene anotation	AGI code	P-value	False Discovery Rate	Average signal	STDEV	Average signal	STDEV
264299_s_at	curculin-like (mannose-binding) lectin family protein	AT1G78850 : AT1G78860	6.328e-15	3.976e-11	20.3433	4.38106	263.978	41.6271
266746_s_at	glutathione S-transferase, putative	AT2G02930 : AT4G02520	3.22e-14	4.619e-11	536.959	121.345	2865.54	75.9499
261534_at	peroxisomal biogenesis factor 11 family protein / PEX11 family protein	AT1G01820	1.821e-13	1.76e-10	545.087	56.0786	2080.63	35.7182
267461_at	dormancy/auxin associated family protein	AT2G33830	2.962e-13	2.189e-10	280.841	71.114	1795.95	226.195
264176_at	proline-rich family protein	AT1G02110	3.149e-13	2.198e-10	11.5623	1.14991	78.783	8.41993
261537_at	short-chain dehydrogenase/reductase (SDR) family protein	AT1G01800	4.938e-13	2.955e-10	182.277	4.32714	993.917	136.506
253874_at	expressed protein	AT4G27450	5.732e-13	3.274e-10	781.512	135.687	3079.2	271.308
246055_at	alpha-galactosidase, putative / melibiase, putative / alpha-D-galactoside galactohydrolase, putative	AT5G08380	7.282e-13	3.978e-10	8.68923	0.203812	65.8814	21.6317
264148_at	no apical meristem (NAM) family protein	AT1G02220	7.789e-13	4.078e-10	1105.55	99.6779	3408.42	345.919
245602_at	expressed protein	AT4G14270	1.602e-12	7.454e-10	109.308	15.0791	475.265	35.0682
259444_at	pentatricopeptide (PPR) repeat-containing protein	AT1G02370	4.404e-12	1.844e-09	27.8195	5.56318	141.269	11.5524
259445_at	gibberellin 2-oxidase, putative / GA2-oxidase, putative	AT1G02400	4.991e-12	2.023e-09	8.67044	0.750313	35.2775	2.79544
260914_at	glycosyl hydrolase family 3 protein	AT1G02640	7.905e-12	2.684e-09	16.822	2.62175	76.2022	2.54497
258339_at	dynein light chain, putative	AT3G16120	1.243e-11	3.608e-09	20.244	2.81333	148.842	55.8023
265817_at	histone H1-3 (HIS1-3)	AT2G18050	1.259e-11	3.608e-09	509.345	89.6619	1951.75	117.821
261655_at	peptidyl-prolyl cis-trans isomerase cyclophilin-type family protein	AT1G01940	1.516e-11	4.142e-09	59.5277	21.2788	368.307	26.7346
264415_at	AP2 domain-containing protein RAP2.6 (RAP2.6)	AT1G43160	1.676e-11	4.309e-09	25.0636	8.12371	161.22	30.616
251304_at	O-methyltransferase family 3 protein	AT3G61990	2.898e-11	6.502e-09	98.7187	25.5792	544.379	93.6231
260978_at	17.6 kDa class I small heat shock protein (HSP17.6C-CI) (AA 1-156)	AT1G53540	3.035e-11	6.691e-09	259.118	70.0173	1195.32	146.797
260876_at	nodulin MtN3 family protein	AT1G21460	3.671e-11	7.952e-09	27.2542	5.42509	148.903	36.0822
249742_at	30S ribosomal protein, putative	AT5G24490	3.751e-11	7.989e-09	9.85671	3.3631	58.4108	13.6215
264168_at	transcriptional regulator-related	AT1G02080	4.629e-11	9.531e-09	643.644	94.7057	2162.86	232.181
267138_s_at	stress-responsive protein, putative	AT2G38210 : AT2G38230 : AT2G38240	4.951e-11	9.874e-09	409.674	14.4314	1185.27	86.5946
261663_at	myb family transcription factor	AT1G18330 : AT3G10113	5.183e-11	1.002e-08	22.8557	4.42618	121.398	18.8109
254934_at	AP2 domain-containing transcription factor, putative	AT4G11140	8.436e-11	1.514e-08	11.3418	1.94859	67.6112	19.9186
250199_at	lipase family protein	AT5G14180	1.019e-10	1.707e-08	170.536	47.4277	852.619	158.961
257484_at	protease-associated (PA) domain-containing protein	AT1G01650	1.074e-10	1.753e-08	914.987	60.2379	2249.36	52.9635
264152_at	mago nashi family protein	AT1G02140	1.246e-10	1.982e-08	2100.19	58.9878	4293.78	147.561
262643_at	invertase/pectin methylesterase inhibitor family protein	AT1G62770	1.394e-10	2.19e-08	6.27756	0.735059	18.885	2.36793
261558_at	expressed protein	AT1G01770	1.457e-10	2.26e-08	532.714	93.7068	1587.99	81.1713
261561_at	expressed protein	AT1G01730	1.593e-10	2.441e-08	246.719	22.361	859.259	41.013
261559_at	LIM domain-containing protein	AT1G01780	1.81e-10	2.644e-08	322.975	62.8234	1080.29	90.9286
249983_at	curculin-like (mannose-binding) lectin family protein	AT5G18470	2.157e-10	3.011e-08	30.2508	8.38972	142.958	18.2752
264923_s_at	peroxiredoxin type 2, putative	AT1G60740 : AT1G65970	2.288e-10	3.12e-08	182.694	40.0593	1052.09	438.416
247651_at	histone H2A, putative	AT5G59870	2.449e-10	3.239e-08	72.6773	9.48323	281.68	43.463
256073_at	mother of FT and TF1 protein (MFT)	AT1G18100	2.977e-10	3.8e-08	91.3975	10.4123	360.898	30.2952
246944_at	ubiquinol-cytochrome C reductase complex 14 kDa protein, putative	AT5G25450	2.994e-10	3.8e-08	179.029	18.8967	590.353	54.0194
256371_at	nodulin MtN3 family protein	AT1G66770	3.833e-10	4.722e-08	136.652	18.8803	446.737	6.39012
257112_at	cytochrome P450 family protein	AT3G20120	3.971e-10	4.845e-08	17.9843	2.77587	76.3009	11.9925
267472_at	plastocyanin-like domain-containing protein / plantacyanin, putative	AT2G02850	4.332e-10	5.17e-08	2082.68	64.6801	4051.81	67.5602
264121_at	GTP-binding protein (TOC33)	AT1G02280	4.361e-10	5.17e-08	416.044	49.2453	1114.7	25.8694
261586_at	speckle-type POZ protein-related	AT1G01640	4.842e-10	5.581e-08	18.8374	2.07239	76.8575	16.8135
259441_at	cathepsin B-like cysteine protease, putative	AT1G02300	5.046e-10	5.712e-08	215.152	32.9311	739.388	132.368
263679_at	DEAD/DEAH box helicase, putative (RH22)	AT1G59990	5.2e-10	5.834e-08	20.24	9.67321	103.352	0.367977
262148_at	26.5 kDa class I small heat shock protein-like (HSP26.5-P)	AT1G52560	5.466e-10	6.078e-08	335.592	118.377	1238.57	117.039
254955_at	transcriptional coactivator p15 (PC4) family protein (KELP)	AT4G10920	6.185e-10	6.797e-08	391.089	25.3008	1111.73	146.338
246133_at	aldehyde oxidase 1 (AAO1)	AT5G20960	7.891e-10	8.263e-08	1860.23	453.069	4735.18	100.522
245555_at	transferase family protein	AT4G15390	7.99e-10	8.297e-08	14.9993	2.51958	59.3146	8.45434
245070_at	plant EC metallothionein-like family 15 protein	AT2G23240	8.414e-10	8.595e-08	3867.39	484.501	7979.24	676.638
260592_at	cellulose synthase family protein	AT1G55850	9.78e-10	9.831e-08	691	101.537	1710.76	57.4269
253388_at	expressed protein	AT4G32910	1.067e-09	1.055e-07	78.5294	23.5805	310.612	46.0997
260398_at	pumilio/Puf RNA-binding domain-containing protein	AT1G72320	1.157e-09	1.127e-07	84.4089	7.33043	276.678	27.3941
252956_at	heavy-metal-associated domain-containing protein / copper chaperone (CCH)-related	AT4G38580	1.447e-09	1.377e-07	83.9242	13.5913	302.584	34.1932
264172_at	GRAM domain-containing protein-related	AT1G02120	1.621e-09	1.509e-07	377.737	123.455	1224.12	31.2163
259417_at	long hypocotyl in far-red 1 (HFR1) / reduced phytochrome signaling (REP1) / basic helix-loop-helix FBI1 protein (FBI1) / reduced sensitivity to far-red light (RSF1) / bHLH protein 26 (BHLH026) (BH ...	AT1G02340	1.633e-09	1.509e-07	160.782	1.56184	537.666	84.7499
264554_at	cinnamyl-alcohol dehydrogenase family / CAD family	AT1G09510	1.652e-09	1.515e-07	13.4396	3.49326	62.565	18.2862
265147_at	eukaryotic translation initiation factor 4A, putative / eIF-4A, putative	AT1G51380	1.671e-09	1.521e-07	16.3135	4.67206	69.2596	5.85597
262838_at	major latex protein-related / MLP-related	AT1G14960	1.72e-09	1.555e-07	23.8076	6.84148	101.657	13.3648
264177_at	pentatricopeptide (PPR) repeat-containing protein	AT1G02150	2.171e-09	1.905e-07	341.597	50.6502	980.54	67.6349
264171_at	leucine carboxyl methyltransferase family protein	AT1G02100	2.183e-09	1.905e-07	50.4274	15.8362	247.762	41.0983
264150_at	COP9 signalosome complex subunit 7ii / CSN complex subunit 7ii (CSN7) (COP15) / FUSCA protein (FUS5)	AT1G02090	2.676e-09	2.261e-07	175.342	32.4997	555.085	27.4294
254778_at	expressed protein	AT4G12750	2.822e-09	2.364e-07	16.0394	2.00708	53.4942	4.48757
261923_at	UDP-glucoronosyl/UDP-glucosyl transferase family protein	AT1G22380	3.032e-09	2.506e-07	10.3085	4.17937	38.7661	3.61295
259415_at	expressed protein	AT1G02330	3.815e-09	3.093e-07	146.629	11.3328	442.138	21.467
261560_at	acyl-CoA thioesterase family protein	AT1G01710	4.601e-09	3.659e-07	542.788	31.3388	1205.69	55.8531
260528_at	WRKY family transcription factor	AT2G47260	5.417e-09	4.228e-07	24.3018	2.77134	84.7534	13.1549
248434_at	23.5 kDa mitochondrial small heat shock protein (HSP23.5-M)	AT5G51440	5.922e-09	4.565e-07	17.162	3.33005	62.394	10.2186
264280_at	glycosyl hydrolase family 1 protein	AT1G61820	6.109e-09	4.652e-07	276.523	67.1937	826.75	111.778
257967_at	zinc finger (C3HC4-type RING finger) family protein	AT3G19910	7.398e-09	5.477e-07	1528.11	189.166	3183.68	141.283
252908_at	expressed protein	AT4G39670	7.692e-09	5.652e-07	70.3745	13.9734	288.157	78.993
259418_at	phospholipid/glycerol acyltransferase family protein	AT1G02390	7.738e-09	5.653e-07	560.674	35.7397	1342.7	201.401
264122_at	Ras-related protein (ARA-5) / small GTP-binding protein, putative	AT1G02130	8.19e-09	5.948e-07	407.469	37.8597	901.68	29.3258
265174_s_at	pseudogene, polygalacturonase (pectinase), putative	AT1G23460 : AT1G23470	8.324e-09	6.011e-07	17.0385	4.57732	60.6857	10.7244
260367_at	expressed protein	AT1G69760	8.521e-09	6.084e-07	191.033	20.0339	540.587	99.8891
250912_at	zinc finger (C2H2 type) family protein	AT5G03740	8.912e-09	6.326e-07	356.045	27.4531	796.134	34.9479
259416_at	cathepsin B-like cysteine protease, putative	AT1G02305	1.027e-08	7.169e-07	3339.7	210.908	5977.64	362.449
260608_at	polygalacturonase, putative / pectinase, putative	AT2G43870	1.053e-08	7.307e-07	264.033	51.5022	698.225	82.1252
263847_at	UDP-glucoronosyl/UDP-glucosyl transferase family protein	AT2G36970	1.072e-08	7.32e-07	10.9662	0.520625	38.677	12.8329
250087_at	tetratricopeptide repeat (TPR)-containing protein	AT5G17270	1.217e-08	8.2e-07	32.2786	3.20891	103.308	17.4415
259541_at	protein kinase family protein	AT1G20650	1.22e-08	8.2e-07	78.536	20.0232	247.055	26.3961
249427_at	40S ribosomal protein S9 (RPS9C)	AT5G39850	1.303e-08	8.667e-07	533.883	51.1645	1123.06	53.5262
264173_at	expressed protein	AT1G02160	1.304e-08	8.667e-07	606.905	34.575	1268.77	61.877
249616_s_at	DNAJ heat shock N-terminal domain-containing protein	AT5G37440 : AT5G37750	1.326e-08	8.768e-07	34.6396	2.00149	95.3014	1.46034
262322_at	expressed protein	AT1G27590	1.387e-08	9.074e-07	18.7724	2.22869	60.9767	9.6714
247192_at	histone H3	AT5G65350 : AT5G65360	1.406e-08	9.157e-07	28.8044	4.72074	99.0852	14.4837
266393_at	glycine-rich protein / late embryogenesis abundant protein (M17)	AT2G41260	1.491e-08	9.605e-07	552.022	344.951	2739.3	402.555
248163_at	auxin-responsive GH3 protein, putative (DFL-1)	AT5G54510	1.508e-08	9.665e-07	94.0297	45.9853	465.879	152.24
246246_at	pentatricopeptide (PPR) repeat-containing protein	AT4G37170	1.55e-08	9.886e-07	11.1176	1.36141	35.1861	8.6896
246925_at	cytochrome P450 71B14, putative (CYP71B14)	AT5G25180	1.566e-08	9.937e-07	1432.08	116.811	2728.21	119.171
247277_at	DNA polymerase V family	AT5G64420	1.659e-08	1.047e-06	37.7848	6.37664	126.129	32.9811
261626_at	expressed protein	AT1G01990	1.713e-08	1.076e-06	101.565	15.7172	309.057	36.4149
261622_at	pentatricopeptide (PPR) repeat-containing protein	AT1G01970	1.855e-08	1.16e-06	379.222	72.1012	934.776	31.5569
267017_at	pseudouridine synthase family protein	AT2G39140	1.886e-08	1.173e-06	91.3549	6.88872	278.748	45.3075
259410_at	expressed protein	AT1G13340	2.041e-08	1.263e-06	57.4485	12.675	184.211	28.4825
250909_at	PAN domain-containing protein	AT5G03700	2.109e-08	1.299e-06	12.7263	1.4694	37.3189	6.42463
260994_at	flavin-containing monooxygenase family protein / FMO family protein	AT1G12130	2.135e-08	1.308e-06	43.5826	6.48854	151.079	30.9687
266544_at	late embryogenesis abundant group 1 domain-containing protein / LEA group 1 domain-containing protein	AT2G35300	2.144e-08	1.308e-06	9368.4	831.287	14934.6	1433.59
249836_at	high mobility group (HMG1/2) family protein	AT5G23420	2.46e-08	1.473e-06	8.38313	1.75574	21.9597	2.74043
253908_at	auxin-responsive GH3 family protein	AT4G27260	2.564e-08	1.519e-06	238.51	16.1762	775.908	269.652
266778_at	cytochrome P450 family protein	AT2G29090	2.661e-08	1.57e-06	167.448	47.0948	547.763	73.7375
250798_at	peroxidase, putative	AT5G05340	2.943e-08	1.728e-06	10.4108	2.58256	44.4217	21.399
256221_at	DNAJ heat shock N-terminal domain-containing protein	AT1G56300	3.067e-08	1.793e-06	79.6275	10.1846	248.138	59.311
250180_at	GDSL-motif lipase/hydrolase family protein	AT5G14450	3.185e-08	1.852e-06	6.59791	0.657322	18.8055	5.28862
255623_at	ribosomal protein L5 family protein	AT4G01310	3.198e-08	1.852e-06	35.4179	1.2924	93.7474	1.73992
261621_at	guanine nucleotide exchange family protein	AT1G01960	3.336e-08	1.914e-06	52.3499	16.075	201.675	47.5359
260781_at	expressed protein	AT1G14620	3.458e-08	1.966e-06	12.0269	2.04786	32.0156	4.11815
261625_at	zinc finger protein-related	AT1G01930	3.563e-08	2.016e-06	97.4918	18.1593	279.893	12.4178
265478_at	expressed protein	AT2G15890	3.59e-08	2.016e-06	509.713	73.4145	1298.21	232.498
256574_at	expressed protein	AT3G14780	4.106e-08	2.205e-06	364.797	72.2688	877.986	145.294
250463_at	bZIP family transcription factor (OBF4)	AT5G10030	4.465e-08	2.367e-06	17.3248	3.60874	52.8712	9.74333
248563_at	UDP-glucoronosyl/UDP-glucosyl transferase family protein	AT5G49690	4.564e-08	2.399e-06	17.4096	4.19431	52.3221	4.85542
260687_at	mitochondrial import inner membrane translocase subunit Tim17/Tim22/Tim23 family protein	AT1G17530	4.86e-08	2.544e-06	443.846	26.1182	943.465	43.0963
246864_at	ent-kaurene oxidase, putative (GA3) / cytochrome P450	AT5G25900	5.088e-08	2.62e-06	427.97	25.2731	915.905	28.777
264123_at	endonuclease/exonuclease/phosphatase family protein / calcium-binding EF hand family protein	AT1G02270	5.471e-08	2.794e-06	120.384	37.6608	335.763	8.78152
249849_at	isochorismatase hydrolase family protein	AT5G23230	5.683e-08	2.891e-06	77.1641	1.92976	201.362	37.9335
259442_at	glycosyl hydrolase family protein 5 / cellulase family protein / (1-4)-beta-mannan endohydrolase, putative	AT1G02310	5.743e-08	2.91e-06	993.579	80.5357	1793.66	112.857
256145_at	delta-adaptin, putative	AT1G48750 : AT1G48760	6.468e-08	3.225e-06	2519.88	333.866	4728.25	50.2778
249178_at	sterol carrier protein 2 (SCP-2) family protein	AT5G42890	6.544e-08	3.25e-06	3240.96	206.617	5373.96	322.243
259017_at	expressed protein	AT3G07310	6.594e-08	3.262e-06	451.59	48.5389	929.525	76.4023
264987_at	expressed protein	AT1G27030	6.931e-08	3.415e-06	335.278	121.075	917.276	44.1613
251109_at	ferritin 1 (FER1)	AT5G01600	7.924e-08	3.828e-06	1969.72	189.75	4626.68	1378.8
264005_at	arabinogalactan-protein (AGP2)	AT2G22470	7.938e-08	3.828e-06	224.844	12.5018	681.36	261.539
265675_at	heat shock protein 70 family protein / HSP70 family protein	AT2G32120	7.981e-08	3.828e-06	1511.74	312.67	3054.54	133.977
261627_at	anion-transporting ATPase, putative	AT1G01910	8.08e-08	3.86e-06	503.954	40.8024	1147.56	114.331
264019_at	peptidyl-prolyl cis-trans isomerase / cyclophilin (CYP2) / rotamase	AT2G21130	8.663e-08	4.108e-06	143.195	20.8382	392.857	30.3721
266271_at	glutathione S-transferase, putative	AT2G29440	9.273e-08	4.348e-06	24.7847	0.973286	64.5417	2.78183
250192_at	pescadillo-related	AT5G14520	9.646e-08	4.506e-06	519.612	71.016	1153.93	59.72
267337_at	transferase family protein	AT2G39980	9.791e-08	4.524e-06	63.5599	23.3567	198.23	17.6964
257517_at	expressed protein	AT3G16330	9.974e-08	4.574e-06	26.3938	5.37224	74.1293	10.2207
262281_at	proton-dependent oligopeptide transport (POT) family protein	AT1G68570	1.005e-07	4.594e-06	1676.36	190.833	3082.18	197.488
261265_at	zinc finger (C3HC4-type RING finger) family protein	AT1G26800	1.032e-07	4.681e-06	281.175	55.4616	660.538	82.236
264510_at	phytochrome interacting factor 3 (PIF3)	AT1G09530	1.069e-07	4.814e-06	12.108	2.25264	31.3196	5.00987
250351_at	17.7 kDa class II heat shock protein 17.6A (HSP17.7-CII)	AT5G12030	1.107e-07	4.923e-06	7958.62	1382.13	12928.3	242.373
263150_at	17.4 kDa class III heat shock protein (HSP17.4-CIII)	AT1G54050	1.215e-07	5.338e-06	527.704	156.758	1276.27	48.1824
266033_at	eukaryotic translation initiation factor 2B family protein / eIF-2B family protein	AT2G05830	1.288e-07	5.618e-06	13.5679	0.967883	32.1792	4.17252
247641_at	SNO glutamine amidotransferase family protein	AT5G60540	1.401e-07	6.049e-06	145.588	27.7614	387.374	59.5421
254011_at	antitermination NusB domain-containing protein	AT4G26370	1.413e-07	6.082e-06	14.5419	3.33666	41.7918	7.71634
266335_at	ent-kaurenoic acid hydroxylase, putative / cytochrome P450, putative	AT2G32440	1.466e-07	6.286e-06	13.4407	0.509545	30.8845	2.20129
253780_at	protein phosphatase 2C, putative / PP2C, putative	AT4G28400	1.496e-07	6.367e-06	10.7096	2.28983	27.9222	4.72686
250196_at	polyribonucleotide nucleotidyltransferase, putative	AT5G14580	1.588e-07	6.675e-06	7.91892	2.49686	21.42	4.57151
246559_at	transducin family protein / WD-40 repeat family protein	AT5G15550	1.637e-07	6.858e-06	39.9082	3.26557	102.475	2.69231
248554_at	ABC1 family protein	AT5G50330	1.669e-07	6.944e-06	7.28037	0.311564	15.533	2.55393
259544_at	catalase 3 (SEN2)	AT1G20620	1.702e-07	7.035e-06	3008.28	234.002	4903.52	292.301
250646_at	peroxidase, putative	AT5G06720	1.735e-07	7.141e-06	8.08778	0.141685	17.0307	2.39359
250757_at	dihydrofolate synthetase/folylpolyglutamate synthetase (DHFS/FPGS2)	AT5G05980	1.739e-07	7.141e-06	43.4128	0.173501	114.987	17.896
263882_at	ribonucleoside-diphosphate reductase small chain, putative / ribonucleotide reductase, putative	AT2G21790	1.818e-07	7.417e-06	12.6409	2.1787	29.0541	3.60624
254147_at	RNA recognition motif (RRM)-containing protein	AT4G24270	1.91e-07	7.742e-06	39.4378	7.92001	111.025	21.711
258397_at	expressed protein	AT3G15357	1.953e-07	7.89e-06	8.81117	1.12291	19.2738	0.799415
262679_at	plant defensin-fusion protein, putative (PDF1.1)	AT1G75830	1.999e-07	8.028e-06	9864.12	592.241	13979.6	343.086
255791_at	plastid developmental protein DAG, putative	AT2G33430	2e-07	8.028e-06	45.9785	7.96068	135.216	10.4308
264508_at	phytochrome A (PHYA)	AT1G09570	2.065e-07	8.264e-06	43.3995	13.0608	142.74	40.425
262624_at	CCR4-NOT transcription complex protein, putative	AT1G06450	2.273e-07	8.979e-06	19.1978	3.05318	54.8919	10.2934
245151_at	pectinesterase family protein	AT2G47550	2.376e-07	9.329e-06	129.607	50.1282	459.081	108.097
266150_s_at	expressed protein	AT2G12290 : AT4G19700	2.471e-07	9.643e-06	452.713	14.7402	972.63	229.752
261301_at	zinc finger (Ran-binding) family protein	AT1G48570	2.487e-07	9.675e-06	29.9632	6.28765	81.9626	2.64742
262911_s_at	17.8 kDa class I heat shock protein (HSP17.8-CI)	AT1G07400 : AT1G59860	2.547e-07	9.788e-06	67.492	20.196	196.458	37.0752
250529_at	DEAD box RNA helicase (RH26)	AT5G08610	2.839e-07	1.074e-05	59.9856	8.50557	165.182	32.8837
264178_at	latex-abundant family protein (AMC1) / caspase family protein	AT1G02170	3.153e-07	1.183e-05	238.76	45.8065	550.878	17.3297
255830_at	transducin family protein / WD-40 repeat family protein	AT2G33340	3.218e-07	1.203e-05	419.904	69.3313	861.882	54.7555
247224_at	MADS-box family protein	AT5G65080	3.265e-07	1.214e-05	8.99355	1.54001	21.6682	3.8359
251029_at	mitochondrial glycoprotein family protein / MAM33 family protein	AT5G02050	3.319e-07	1.227e-05	98.0157	11.0805	255.024	33.4387
259990_s_at	F-box family protein (FKF1) / adagio 3 (ADO3)	AT1G68050 : AT5G23410 : AT5G42730	3.506e-07	1.281e-05	458.67	10.2205	917.967	129.606
257670_at	expressed protein	AT3G20340	3.621e-07	1.307e-05	256.281	68.2139	653.725	83.78
255053_at	DEAD/DEAH box helicase, putative	AT4G09730	3.685e-07	1.321e-05	12.7217	1.24083	35.8502	13.2165
251122_at	protein kinase family protein	AT5G01020	3.689e-07	1.321e-05	34.6505	11.4839	108.433	20.2178
256902_s_at	expressed protein	AT3G23910 : AT3G24255	3.856e-07	1.369e-05	101.819	11.1685	242.672	20.7103
254919_at	zinc finger (C3HC4-type RING finger) family protein (RHA1b)	AT4G11360	3.925e-07	1.389e-05	312.59	18.9355	681.044	133.647
260912_at	ATP-dependent Clp protease proteolytic subunit (ClpP1)	AT1G02560	4.401e-07	1.524e-05	2214.23	162.772	3724.28	281.91
264985_at	expressed protein	AT1G27150	4.403e-07	1.524e-05	918.768	142.59	1697.65	118.289
267162_s_at	phosphoribosylaminoimidazole carboxylase, putative / AIR carboxylase, putative	AT2G05140 : AT2G37690	4.687e-07	1.602e-05	26.2507	7.42766	72.4361	9.93076
263320_at	galactinol synthase, putative	AT2G47180	4.691e-07	1.602e-05	2026.75	190.966	3334.61	249.664
265216_at	protein kinase family protein	AT1G05100	4.733e-07	1.612e-05	119.096	19.0365	281.525	16.1224
253438_at	glycine hydroxymethyltransferase, putative / serine hydroxymethyltransferase, putative / serine/threonine aldolase, putative	AT4G32520	4.758e-07	1.616e-05	102.485	26.4507	271.972	51.6886
258971_at	ACT domain-containing protein (ACR6)	AT3G01990	4.778e-07	1.618e-05	43.7814	10.4858	122.597	25.9113
250746_at	UDP-glucoronosyl/UDP-glucosyl transferase family protein	AT5G05880	4.94e-07	1.669e-05	22.9474	1.517	63.5001	11.9993
248093_at	expressed protein	AT5G55210	5.526e-07	1.842e-05	62.7017	8.08533	140.617	10.5842
266321_at	cytochrome P450, putative	AT2G46660	5.555e-07	1.847e-05	52.2714	9.64655	139.336	26.4955
248605_at	expressed protein	AT5G49410	5.631e-07	1.867e-05	8.54411	0.987387	18.8457	3.94111
254035_at	phosphatidylserine decarboxylase, putative	AT4G25970	5.735e-07	1.891e-05	115.129	28.5777	289.702	38.432
264069_at	RuBisCO subunit binding-protein alpha subunit, chloroplast / 60 kDa chaperonin alpha subunit / CPN-60 alpha	AT2G28000	5.924e-07	1.944e-05	75.0929	8.19136	187.796	36.523
263488_at	expressed protein	AT2G31840	6.056e-07	1.977e-05	32.12	4.98664	90.828	26.0136
255455_at	elongation factor Tu, putative / EF-Tu, putative	AT4G02930	6.274e-07	2.032e-05	119.425	17.3887	302.723	28.8232
253981_at	mitochondrial import inner membrane translocase subunit Tim17/Tim22/Tim23 family protein	AT4G26670	6.322e-07	2.032e-05	19.6557	1.00348	50.8875	7.94545
266818_at	zinc finger (C3HC4-type RING finger) family protein	AT2G44950	6.465e-07	2.059e-05	78.4965	9.72803	180.477	27.6769
254014_at	ankyrin repeat family protein / BTB/POZ domain-containing protein	AT4G26120	6.474e-07	2.059e-05	20.0432	4.42942	54.1782	8.75077
259446_at	cytochrome c oxidase assembly protein CtaG / Cox11 family	AT1G02410	6.553e-07	2.079e-05	259.134	11.194	525.942	34.4656
247525_at	ABI3-interacting protein 1 (AIP1)	AT5G61380	6.783e-07	2.145e-05	36.5354	3.39889	93.1935	25.4485
257352_at	DNA-binding bromodomain-containing protein	AT2G34900	6.866e-07	2.162e-05	16.3832	1.08312	36.7339	1.12938
253900_at	eukaryotic translation initiation factor SUI1, putative	AT4G27130	6.922e-07	2.174e-05	1790.71	158.594	3118.18	63.6116
259767_s_at	expressed protein	AT1G29350 : AT1G29370	6.968e-07	2.178e-05	718.853	35.5942	1291.74	144.26
255811_at	22.0 kDa ER small heat shock protein (HSP22.0-ER)	AT4G10250	7.134e-07	2.213e-05	10.1221	1.34403	26.7144	8.66806
246238_at	mannitol transporter, putative	AT4G36670	7.202e-07	2.229e-05	32.2161	4.98737	85.3779	16.4865
256905_at	chaperonin (CPN60) (HSP60)	AT3G23990	7.268e-07	2.238e-05	201.963	32.829	438.158	13.8155
247151_at	basic helix-loop-helix (bHLH) family protein	AT5G65640	7.626e-07	2.331e-05	44.9935	7.73547	112.747	11.4263
246003_at	20 kDa chaperonin, chloroplast (CPN21) (CHCPN10) (CPN20)	AT5G20720	7.752e-07	2.358e-05	335.468	22.8187	686.358	7.83596
267579_at	plant EC metallothionein-like family 15 protein	AT2G42000	7.804e-07	2.363e-05	3391.16	410.331	5548.24	567.488
263374_at	DNAJ heat shock family protein	AT2G20560	7.998e-07	2.41e-05	1142.97	200.028	1999.8	116.698
262603_at	lactoylglutathione lyase family protein / glyoxalase I family protein	AT1G15380	8.281e-07	2.482e-05	696.579	131.449	1454.06	330.081
258995_at	ribosomal protein L13 family protein	AT3G01790	8.579e-07	2.542e-05	253.709	9.41247	500.5	14.2786
251551_at	ethylene-responsive transcriptional coactivator, putative	AT3G58680	8.724e-07	2.579e-05	3015.59	249.247	4638.2	67.8421
251985_at	thioredoxin family protein	AT3G53220	8.889e-07	2.622e-05	11.2362	1.14202	26.9389	4.41151
261272_at	expressed protein	AT1G26665	9.055e-07	2.658e-05	882.383	87.7197	1516.08	85.2971
248332_at	heat shock protein 81-1 (HSP81-1) / heat shock protein 83 (HSP83)	AT5G52640	9.079e-07	2.659e-05	1395.76	354.506	2582.6	121.718
257830_at	MutT/nudix family protein	AT3G26690	9.347e-07	2.725e-05	17.1088	3.03344	44.409	12.4011
255129_at	nodulin MtN21 family protein	AT4G08290	9.516e-07	2.768e-05	535.286	64.1553	954.397	21.8668
257132_at	50S ribosomal protein L18 family	AT3G20230	9.997e-07	2.901e-05	51.0832	4.37619	127.352	9.26458
260079_s_at	zinc finger protein-related	AT1G35460 : AT5G33210	1.015e-06	2.931e-05	523.687	7.85009	1011.62	118.219
256890_at	glycine-rich RNA-binding protein, putative	AT3G23830	1.02e-06	2.934e-05	81.4842	25.7149	211.119	25.2073
263275_at	methylmalonate-semialdehyde dehydrogenase, putative	AT2G14170	1.046e-06	2.995e-05	250.515	8.23858	532.397	46.6974
252464_at	expressed protein	AT3G47160	1.049e-06	2.995e-05	1103.86	24.8737	1761.7	56.1019
262605_at	MATE efflux family protein	AT1G15170	1.1e-06	3.127e-05	35.2966	1.85015	81.6262	16.6731
256516_at	leucine-rich repeat protein kinase, putative (TMK1)	AT1G66150	1.104e-06	3.132e-05	86.1351	21.327	271.385	122.298
260157_at	brix domain-containing protein	AT1G52930	1.162e-06	3.252e-05	33.3637	9.58609	99.8661	25.45
267001_at	urease accessory protein (UREG)	AT2G34470	1.166e-06	3.255e-05	11.3008	1.69711	26.8751	3.87941
264048_at	NOL1/NOP2/sun family protein	AT2G22400	1.17e-06	3.26e-05	32.7775	8.03414	84.2739	11.7634
264142_at	mitochondrial transcription termination factor-related / mTERF-related	AT1G78930	1.22e-06	3.371e-05	12.1364	1.46161	26.9567	4.22637
262754_at	inosine-5'-monophosphate dehydrogenase, putative	AT1G16350	1.221e-06	3.371e-05	40.3506	6.90189	100.944	10.12
260668_at	expressed protein	AT1G19530	1.222e-06	3.371e-05	1076.46	239.209	1923.74	112.062
261919_at	peroxiredoxin type 2, putative	AT1G65980	1.224e-06	3.371e-05	3603.49	93.7383	5470.09	125.113
256666_at	histone H2A, putative	AT3G20670	1.261e-06	3.451e-05	70.8369	10.978	177.329	33.2812
266076_at	DEAD/DEAH box helicase, putative (RH17)	AT2G40700	1.269e-06	3.466e-05	35.9752	7.106	85.6016	6.29219
250409_at	CBS domain-containing protein	AT5G10860	1.277e-06	3.48e-05	1767.34	168.409	3027.15	222.201
246062_at	armadillo/beta-catenin repeat family protein / BTB/POZ domain-containing protein	AT5G19330	1.333e-06	3.608e-05	95.7018	17.6242	206.516	12.655
253061_at	TAZ zinc finger family protein / BTB/POZ domain-containing protein	AT4G37610	1.341e-06	3.625e-05	51.4069	7.85697	189.192	106.854
246099_at	plastocyanin-like domain-containing protein	AT5G20230	1.359e-06	3.663e-05	907.395	37.2782	1596.02	228.665
246252_s_at	patatin, putative	AT4G37060 : AT4G37070	1.485e-06	3.996e-05	20.7927	3.33545	50.7758	0.752234
259859_at	protein phosphatase 2C-related / PP2C-related	AT1G68410	1.532e-06	4.112e-05	151.329	7.73099	332.177	71.0599
266992_at	seven transmembrane MLO family protein / MLO-like protein 12 (MLO12)	AT2G39200	1.542e-06	4.13e-05	24.2028	6.15431	70.2221	20.3798
257280_at	9-cis-epoxycarotenoid dioxygenase, putative / neoxanthin cleavage enzyme, putative / carotenoid cleavage dioxygenase, putative	AT3G14440	1.552e-06	4.149e-05	175.005	27.4488	377.198	30.0021
253188_at	transporter-related	AT4G35300	1.593e-06	4.25e-05	134.941	9.68937	280.086	10.4359
253987_at	phosphofructokinase family protein	AT4G26270	1.613e-06	4.285e-05	231.974	15.5615	490.209	59.3878
259138_s_at	DNA topoisomerase, ATP-hydrolyzing, putative / DNA topoisomerase II, putative / DNA gyrase, putative	AT3G10270 : AT5G04130	1.632e-06	4.318e-05	23.4356	3.87036	57.6394	10.5385
264471_at	midasin-related	AT1G67120	1.649e-06	4.353e-05	28.2749	6.61167	70.6642	7.70579
261007_at	FAD-binding domain-containing protein	AT1G26400	1.657e-06	4.364e-05	750.624	106.136	1312.72	83.7875
256319_at	trehalose-6-phosphate phosphatase, putative	AT1G35910	1.68e-06	4.417e-05	249.012	41.1355	551.382	63.3925
264702_at	ribosomal protein L12 family protein	AT1G70190	1.783e-06	4.658e-05	16.615	0.57084	37.1357	4.42996
265482_at	glycine-rich protein	AT2G15780	1.874e-06	4.865e-05	46.5721	10.5832	127.825	20.0107
261906_at	OXA1 family protein	AT1G65080	2.022e-06	5.206e-05	9.35723	2.26206	20.0322	2.70855
261603_at	RNA-binding protein 47 (RBP47), putative	AT1G49600	2.054e-06	5.265e-05	25.1459	1.66435	62.7004	14.6305
263073_at	auxin efflux carrier family protein	AT2G17500	2.057e-06	5.265e-05	887.481	75.9665	1813.68	504.314
247551_at	nuclear transport factor 2 (NTF2) family protein / RNA recognition motif (RRM)-containing protein	AT5G60980	2.135e-06	5.453e-05	73.1139	16.1629	170.331	10.2706
248238_at	expressed protein	AT5G53900	2.156e-06	5.484e-05	5.4747	0.434376	9.58576	1.18546
245523_at	drought-responsive protein / drought-induced protein (Di21)	AT4G15910	2.237e-06	5.644e-05	114.605	6.87998	261.314	65.9997
250219_at	lipase family protein	AT5G14180	2.274e-06	5.703e-05	16.7739	2.20132	35.2029	2.63052
264712_at	expressed protein	AT1G09810	2.29e-06	5.731e-05	45.4135	12.0751	112.882	8.84119
250066_at	MA3 domain-containing protein	AT5G17930	2.316e-06	5.775e-05	36.7049	6.02108	81.3398	10.914
256480_at	expressed protein	AT1G33410	2.324e-06	5.782e-05	35.0004	10.5587	93.9047	12.3612
263082_at	GTP-binding family protein	AT2G27200	2.33e-06	5.787e-05	211.924	33.2593	434.019	52.9288
247679_at	oxidoreductase, 2OG-Fe(II) oxygenase family protein	AT5G59540	2.35e-06	5.812e-05	40.7072	7.00548	108.642	30.6499
252563_at	expansin family protein (EXPL1)	AT3G45970	2.366e-06	5.84e-05	2139.92	255.966	3411.93	235.106
264169_at	nitroreductase family protein	AT1G02020	2.405e-06	5.914e-05	65.1712	13.5611	145.827	15.2333
257678_at	ribonuclease III family protein	AT3G20420	2.428e-06	5.951e-05	10.8657	0.696015	21.9706	2.07995
247307_at	UVB-resistance protein (UVR8)	AT5G63860	2.465e-06	6.006e-05	1517.86	132.02	2468.14	99.8157
249308_at	zinc finger (C3HC4-type RING finger) family protein	AT5G41350	2.466e-06	6.006e-05	614.099	101.169	1139.15	123.2
252508_at	3' exoribonuclease family domain 1-containing protein	AT3G46210	2.547e-06	6.19e-05	39.2524	8.63195	94.0107	14.3819
252984_at	mannitol dehydrogenase, putative (ELI3-2)	AT4G37990	2.558e-06	6.205e-05	4020.28	509.976	6975.79	1341.49
265432_at	zinc finger (C3HC4-type RING finger) family protein	AT2G20650	2.572e-06	6.227e-05	17.1377	6.57456	74.1727	45.2796
248606_at	bZIP family transcription factor	AT5G49450	2.588e-06	6.254e-05	1062.56	84.8826	1771.35	214.074
253116_at	pentatricopeptide (PPR) repeat-containing protein	AT4G35850	2.653e-06	6.398e-05	12.7502	1.86161	26.4169	1.72669
266392_at	late embryogenesis abundant protein (M10) / LEA protein M10	AT2G41280	2.687e-06	6.444e-05	9308.56	1005.58	13030.1	578.904
259165_at	homeobox-leucine zipper protein 5 (HAT5) / HD-ZIP protein 5 / HD-ZIP protein (HB-1)	AT3G01470	2.8e-06	6.701e-05	159.205	2.57502	338.143	30.7942
267313_at	protein phosphatase 2C, putative / PP2C, putative	AT2G34740	2.808e-06	6.708e-05	549.184	184.996	1201.94	75.9972
260411_at	expressed protein	AT1G69890	2.85e-06	6.79e-05	152.766	17.1355	304.944	16.47
252323_at	CBS domain-containing protein	AT3G48530	2.859e-06	6.79e-05	130.831	17.5678	304.253	1.98366
257985_at	transcription factor jumonji (jmjC) domain-containing protein	AT3G20810	2.877e-06	6.82e-05	120.68	35.8614	278.157	2.90456
266310_at	COP9 signalosome complex subunit 2 / CSN complex subunit 2 (CSN2)	AT2G26990	2.905e-06	6.875e-05	667.365	62.7061	1124.2	42.4017
247431_at	expressed protein	AT5G62520	2.951e-06	6.956e-05	186.11	2.40117	352.116	30.1972
252993_at	monooxygenase, putative (MO2)	AT4G38540	3.096e-06	7.245e-05	62.7942	16.8432	140.9	9.08738
257504_at	dynein light chain type 1 family protein	AT1G52250	3.129e-06	7.308e-05	31.3257	5.96526	77.7274	9.4635
258707_at	histone H2B, putative	AT3G09480	3.138e-06	7.315e-05	63.7578	4.695	153.94	39.978
248181_at	cytochrome c biogenesis protein family	AT5G54290	3.171e-06	7.378e-05	740.592	64.528	1242.43	41.4882
256522_at	U-box domain-containing protein	AT1G66160	3.363e-06	7.783e-05	42.7091	9.2678	103.702	20.1224
264475_s_at	pentatricopeptide (PPR) repeat-containing protein	AT1G77150 : AT1G77170	3.377e-06	7.801e-05	44.6698	5.32243	102.514	9.84482
249242_at	alcohol dehydrogenase, putative	AT5G42250	3.429e-06	7.862e-05	122.976	9.15424	278.14	19.5602
259008_at	metallothionein protein, putative (MT2A)	AT3G09390	3.438e-06	7.868e-05	5480.59	180.975	8183.35	683.993
248628_at	5' nucleotidase family protein	AT5G48960	3.445e-06	7.87e-05	26.6903	3.82724	62.4944	3.05892
260824_at	expressed protein	AT1G06720	3.535e-06	8.047e-05	15.3316	3.68147	35.292	2.97092
262527_at	oxidoreductase, 2OG-Fe(II) oxygenase family protein	AT1G17010	3.624e-06	8.191e-05	2343.82	100.539	3754.23	294.72
262499_at	expressed protein	AT1G21770 : AT1G21780	3.637e-06	8.205e-05	963.129	189.472	1654.75	200.629
253812_at	NADH dehydrogenase-related	AT4G28220 : AT4G28240	3.679e-06	8.27e-05	658.722	75.6946	1106.36	30.7947
266934_at	transducin family protein / WD-40 repeat family protein	AT2G18900	3.72e-06	8.341e-05	18.0317	1.29025	38.5645	3.76141
246386_at	beta-galactosidase, putative / lactase, putative	AT1G77410	3.724e-06	8.341e-05	6.70917	0.170214	11.6183	0.581002
250314_at	RNA recognition motif (RRM)-containing protein	AT5G12190	3.753e-06	8.39e-05	666.396	70.8586	1132.45	79.4634
251760_at	mitochondrial glycoprotein family protein / MAM33 family protein	AT3G55605	3.787e-06	8.453e-05	22.7415	1.88217	51.0052	2.62969
254592_at	heat shock transcription factor 21 (HSF21)	AT4G18880	3.8e-06	8.458e-05	16.5465	1.92724	34.0279	0.887058
252968_at	dihydrouridine synthase family protein	AT4G38890	3.803e-06	8.458e-05	17.0613	0.940693	36.4498	5.30267
258815_at	short-chain dehydrogenase/reductase (SDR) family protein	AT3G04000	3.813e-06	8.465e-05	146.784	14.1508	315.039	48.081
260697_at	zinc finger (C3HC4-type RING finger) family protein	AT1G32530	3.832e-06	8.493e-05	105.47	5.60237	215.892	25.0906
260525_at	RNA helicase, putative	AT2G47250	4.068e-06	8.984e-05	170.725	19.6257	348.814	9.61673
264167_at	pentatricopeptide (PPR) repeat-containing protein	AT1G02060	4.077e-06	8.987e-05	5.9522	0.873294	10.4633	0.953764
262656_at	zinc finger (C3HC4-type RING finger) family protein	AT1G14200	4.279e-06	9.384e-05	578.801	63.7794	965.121	38.7909
257853_at	expressed protein	AT3G12960	4.437e-06	9.697e-05	7064.9	136.368	9798.23	508.074
254865_s_at	zinc finger (C3HC4-type RING finger) family protein	AT4G05350 : AT4G12190	4.445e-06	9.697e-05	142.054	21.6741	314.354	37.3282
264652_at	sugar transporter, putative	AT1G08920	4.597e-06	9.959e-05	1110.93	62.1972	1753.07	151.026
251766_at	expressed protein	AT3G55910	4.632e-06	9.984e-05	64.9823	12.0939	145.294	28.3281
261668_at	2-isopropylmalate synthase, putative	AT1G18500	4.787e-06	0.0001023	636.833	28.1891	1124.75	81.4074
260390_at	expressed protein	AT1G73940	4.827e-06	0.0001028	107.341	18.1098	228.062	40.2913
253777_at	transducin family protein / WD-40 repeat family protein	AT4G28450	4.836e-06	0.0001028	41.1971	9.04582	98.5099	2.892
258631_at	polygalacturonase, putative / pectinase, putative	AT3G07970	4.898e-06	0.0001038	34.0049	3.47858	102.935	50.9258
246775_at	GTP-binding protein-related	AT5G27540	5.106e-06	0.0001078	452.458	19.4397	768.77	2.77297
259243_at	expressed protein	AT3G07565	5.114e-06	0.0001078	614.599	96.106	1078.81	51.0623
245668_at	dormancy-associated protein, putative (DRM1)	AT1G28330	5.126e-06	0.0001079	1313.54	122.315	2007.97	20.2297
247540_at	AP2 domain-containing transcription factor family protein	AT5G61590	5.136e-06	0.0001079	987.224	54.8733	1535.65	116.807
257965_at	expressed protein	AT3G19900	5.169e-06	0.0001084	1016.48	71.6239	1642.42	187.361
247177_at	expressed protein	AT5G65300	5.313e-06	0.0001111	97.5613	22.6266	238.81	70.5322
247771_at	Ran-binding protein 1, putative / RanBP1, putative	AT5G58590	5.33e-06	0.0001112	317.538	37.5491	583.106	54.2794
265709_at	expressed protein	AT2G03540	5.36e-06	0.0001117	8.98435	1.28446	18.2256	4.42716
260235_at	nucleosome assembly protein (NAP) family protein	AT1G74560	5.404e-06	0.0001122	247.888	33.6908	528.009	113.15
265947_at	transducin family protein / WD-40 repeat family protein	AT2G19540	5.413e-06	0.0001122	403.879	57.0467	703.457	16.7659
263411_at	zinc finger (C2H2 type) family protein	AT2G28710	5.44e-06	0.0001126	21.0461	3.98749	47.9089	6.21296
255767_at	ribosomal protein L20 family protein	AT1G16740	5.532e-06	0.0001143	570.449	0.381511	952.294	103.205
256628_at	porin family protein	AT3G20000	5.581e-06	0.0001151	178.636	29.1684	345.658	2.21852
256241_at	nascent polypeptide associated complex alpha chain protein, putative / alpha-NAC, putative	AT3G12390	5.811e-06	0.0001193	196.521	11.7873	396.459	54.0814
256995_at	protein kinase family protein	AT3G25840	5.864e-06	0.0001202	114.964	34.9448	253.129	7.97123
251177_at	peptidyl-prolyl cis-trans isomerase cyclophilin-type family protein	AT3G63400	5.886e-06	0.0001205	118.367	30.0049	257.663	22.7553
246225_at	CBS domain-containing protein	AT4G36910	5.957e-06	0.0001215	672.588	79.727	1113.01	93.1271
247735_at	thymidylate kinase family protein	AT5G59440	5.957e-06	0.0001215	77.9899	9.64024	167.008	25.3703
251593_at	DNA-directed RNA polymerase family protein	AT3G57660	6.182e-06	0.0001257	63.1613	13.7338	145.31	41.097
246612_at	expressed protein	AT5G35320	6.183e-06	0.0001257	551.174	100.296	957.231	37.0354
259966_at	DNA-binding family protein	AT1G76500	6.2e-06	0.0001258	7.62501	1.91347	15.4055	2.49541
250151_at	transporter, putative	AT5G14570	6.283e-06	0.0001269	376.223	163.935	827.513	50.5254
265139_at	tRNA methyl transferase family protein	AT1G51310	6.627e-06	0.0001328	64.6639	9.87732	135.424	17.6389
246325_at	molybdenum cofactor sulfurase (LOS5) (ABA3)	AT1G16540	6.675e-06	0.0001335	349.076	33.5379	603.352	27.139
265983_at	homeobox-leucine zipper family protein	AT2G18550	6.727e-06	0.0001344	33.8969	11.91	83.3423	7.61276
259248_at	heat shock protein-related	AT3G07770	6.788e-06	0.0001352	112.244	27.0183	243.527	41.2741
247009_at	expressed protein	AT5G67600	7.106e-06	0.00014	3715.72	249.737	5385.95	172.585
249461_at	hypothetical protein	AT5G39640	7.234e-06	0.0001422	21.4509	2.05851	47.5229	6.77471
249575_at	15.7 kDa class I-related small heat shock protein-like (HSP15.7-CI)	AT5G37670	7.35e-06	0.0001441	319.645	67.6422	611.328	61.2926
267018_at	pseudouridine synthase family protein	AT2G39140	7.565e-06	0.0001478	15.5393	4.27633	37.375	7.0417
248737_at	expressed protein	AT5G48120	7.636e-06	0.000149	36.2704	11.8329	85.0794	4.41469
254393_at	oxidoreductase, zinc-binding dehydrogenase family protein	AT4G21580	7.754e-06	0.0001511	1428.79	89.4237	2216.79	86.6885
266797_at	expressed protein	AT2G22840	7.887e-06	0.0001534	142.344	31.1536	308.528	20.8268
246928_at	expressed protein	AT5G25270	7.897e-06	0.0001534	117.905	5.25963	232.146	11.9073
263647_at	cellular repressor of E1A-stimulated genes (CREG) family	AT2G04690	7.956e-06	0.0001543	903.785	69.9756	1462.84	166.646
248337_at	low-temperature-responsive protein 78 (LTI78) / desiccation-responsive protein 29A (RD29A)	AT5G52310	8.012e-06	0.0001551	146.446	84.6921	409.79	7.73387
259520_at	expressed protein	AT1G12320	8.107e-06	0.0001565	364.946	41.4371	619.022	34.3383
257291_at	DNA-binding protein, putative	AT3G15590	8.179e-06	0.0001576	396.79	108.985	804.209	5.59292
252625_at	histone deacetylase, putative (HD2A)	AT3G44750	8.365e-06	0.0001605	94.3343	12.1273	188.591	2.27293
245866_s_at	purine permease-related	AT1G57980 : AT1G57990	8.415e-06	0.0001612	24.5401	9.69296	64.7471	15.8214
250896_at	expressed protein	AT5G03560	8.511e-06	0.000162	147.717	5.47804	289.506	19.2536
254943_at	expressed protein	AT4G10890	8.606e-06	0.0001636	7.60685	0.912414	14.3422	2.35773
246514_at	DNA-directed RNA polymerase (RPOT2)	AT5G15700	8.676e-06	0.0001644	12.8852	0.51174	24.2908	2.038
250279_at	GRAM domain-containing protein / ABA-responsive protein-related	AT5G13200	8.967e-06	0.0001694	532.725	19.7503	893.67	115.771
264126_at	expressed protein	AT1G79280	9.059e-06	0.0001706	126.058	46.8296	307.075	46.958
261616_at	no apical meristem (NAM) family protein	AT1G33060	9.717e-06	0.0001814	111.77	28.3123	222.561	17.9525
262703_at	auxin-responsive family protein	AT1G16510	9.717e-06	0.0001814	464.826	18.984	779.698	66.5922
260025_at	SGS domain-containing protein	AT1G30070	9.751e-06	0.0001818	576.417	98.5138	981.27	28.9056
253104_at	pathogenesis-related thaumatin family protein	AT4G36010	9.839e-06	0.0001832	12.4421	1.19244	24.6211	3.39577
248140_at	integral membrane family protein	AT5G54980	9.914e-06	0.0001843	29.3155	2.75309	63.7134	5.21058
260359_at	expressed protein	AT1G69210	1.029e-05	0.0001901	11.7592	0.700741	22.1856	0.312726
247074_at	allergen V5/Tpx-1-related family protein	AT5G66590	1.032e-05	0.0001903	110.102	29.9571	224.403	28.7149
250649_at	thioredoxin family protein	AT5G06690	1.034e-05	0.0001905	9.83768	1.20307	18.6492	2.67621
264941_at	aldo/keto reductase family protein	AT1G60680	1.058e-05	0.0001942	415.037	75.2894	735.981	52.9342
262584_at	transducin family protein / WD-40 repeat family protein	AT1G15440	1.063e-05	0.0001945	96.354	16.9463	197.703	27.8836
246059_at	expressed protein	AT5G08450	1.072e-05	0.0001958	184.48	20.4499	350.335	17.6769
257224_at	haloacid dehalogenase-like hydrolase family protein	AT3G27870	1.095e-05	0.0001997	59.2456	7.5033	130.468	20.3149
250434_at	histone H3	AT5G10390	1.114e-05	0.0002024	26.8255	4.74565	56.8665	4.32094
249767_at	acidic endochitinase (CHIB1)	AT5G24090	1.122e-05	0.0002034	10.8682	2.28301	21.508	2.42416
246623_at	nucleolin, putative	AT1G48920	1.138e-05	0.000206	1782.59	251.543	2911.59	272.41
247049_at	expressed protein	AT5G66440	1.14e-05	0.0002061	294.401	53.2293	601.235	111.056
262379_at	expressed protein	AT1G73020	1.145e-05	0.0002066	56.4295	8.18137	115.05	7.06242
249081_at	calcium-binding EF hand family protein, putative / protein phosphatase 2A 62 kDa B'' regulatory subunit, putative	AT5G44090	1.15e-05	0.0002073	846.082	137.288	1372.95	99.6659
263727_at	mRNA cap-binding protein (ABH1)	AT2G13540	1.173e-05	0.0002111	31.594	8.84448	74.6616	10.5453
260585_at	Sas10/U3 ribonucleoprotein (Utp) family protein	AT2G43650	1.191e-05	0.0002142	47.0837	14.4959	119.693	26.0326
259293_at	DNA-binding protein, putative	AT3G11580	1.199e-05	0.0002152	36.2125	6.19338	79.91	19.9324
254766_at	terpene synthase/cyclase family protein	AT4G13280	1.256e-05	0.0002232	13.3507	3.26907	28.7322	5.75454
253725_at	profilin 3 (PRO3) (PFN3)	AT4G29340	1.263e-05	0.0002238	6.06029	0.809081	11.5682	2.86059
254353_s_at	ubiquitin carboxyl-terminal hydrolase family protein	AT4G22290 : AT4G22350	1.268e-05	0.0002244	260.718	52.2887	490.923	67.6007
256576_at	zinc finger (AN1-like) family protein	AT3G28210	1.27e-05	0.0002244	569.858	131.849	1087.9	255.786
259782_at	expressed protein	AT1G29680	1.328e-05	0.0002334	4732.68	236.752	6794.96	201.466
260276_at	VQ motif-containing protein	AT1G80450	1.361e-05	0.0002384	4.82553	0.337785	7.46871	0.856248
263210_at	expressed protein	AT1G10585	1.363e-05	0.0002386	53.1451	12.8026	183.589	113.608
247692_s_at	histone H4	AT5G59690 : AT5G59970	1.39e-05	0.0002422	1283.57	90.7126	1907.2	123.599
247363_at	tetratricopeptide repeat (TPR)-containing protein	AT5G63200	1.392e-05	0.0002422	9.3862	1.56171	16.5602	0.789351
251983_at	nodulin MtN21 family protein	AT3G53210	1.402e-05	0.0002433	7.79351	0.209136	14.1945	2.60723
261250_at	pseudogene, ARI protein	AT1G05890	1.41e-05	0.000244	388.054	50.6549	698.314	42.1298
255452_at	expressed protein	AT4G02880	1.416e-05	0.0002447	68.0488	8.12277	144.051	11.855
256091_at	high mobility group protein beta1 (HMGbeta1) / HMG protein beta1	AT1G20693	1.433e-05	0.0002469	1369.72	191.995	2168.09	170.1
250718_at	expressed protein	AT5G06240	1.459e-05	0.0002505	24.658	2.96363	52.007	5.54297
262850_at	gibberellin response modulator (GAI) (RGA2) / gibberellin-responsive modulator	AT1G14920	1.481e-05	0.0002539	41.7897	7.48997	99.9558	28.9688
245512_at	60S ribosome subunit biogenesis protein, putative	AT4G15770	1.485e-05	0.0002541	350.54	24.5563	601.063	90.0862
263666_at	transducin family protein / WD-40 repeat family protein	AT1G04510	1.49e-05	0.0002547	232.672	17.9289	445.616	59.4064
246255_at	transcription factor IIB (TFIIB) family protein	AT4G36650	1.502e-05	0.000256	21.167	4.11089	44.6382	5.38337
252942_at	expressed protein	AT4G39300	1.515e-05	0.0002577	71.674	2.87532	143.939	15.3488
259596_at	auxin-responsive GH3 family protein	AT1G28130	1.518e-05	0.0002578	236.206	44.5214	491.615	112.239
257192_at	Cwf15 / Cwc15 cell cycle control family protein	AT3G13200	1.523e-05	0.0002579	1466.95	32.9729	2145.8	70.3696
252883_at	GTP-binding protein, putative	AT4G39520	1.529e-05	0.0002586	419.733	49.1131	702.541	34.391
248329_at	expressed protein	AT5G52780	1.539e-05	0.0002599	7.54966	1.06648	14.0318	2.80283
251537_at	expressed protein	AT3G58470	1.547e-05	0.0002609	13.5441	1.71696	25.6191	1.75049
260012_at	expressed protein	AT1G67865	1.58e-05	0.0002651	178.382	13.3356	341.451	57.5514
250476_at	MADS-box protein flowering locus F (FLF)	AT5G10140	1.628e-05	0.0002721	224.595	16.3281	408.614	40.9908
254399_at	G10 family protein	AT4G21110	1.633e-05	0.0002721	876.606	46.285	1357.83	172.261
252213_at	2-oxoacid-dependent oxidase, putative	AT3G50210	1.652e-05	0.0002742	206.36	23.5681	376.119	29.2969
245949_at	elongation factor 1B alpha-subunit 2 (eEF1Balpha2)	AT5G19510	1.685e-05	0.0002784	1073.16	11.377	1589.4	88.5493
254228_at	50S ribosomal protein-related	AT4G23620	1.708e-05	0.0002816	8.35441	1.19965	14.3698	0.57064
251203_at	PWWP domain-containing protein	AT3G63070	1.715e-05	0.0002824	83.189	31.1509	182.942	25.1089
250938_at	zinc finger (C3HC4-type RING finger) family protein	AT5G03180	1.759e-05	0.0002885	1175.21	169.101	1811.2	57.6495
262112_at	expressed protein	AT1G02870	1.767e-05	0.0002895	409.282	49.6683	684.513	50.4107
249115_at	pinhead protein (PINHEAD) / zwille protein (ZWILLE)	AT5G43810	1.781e-05	0.0002914	10.9145	1.22731	20.3724	1.74098
252830_at	peroxisomal ABC transporter (PXA1)	AT4G39850	1.83e-05	0.0002987	890.925	236.872	1538.04	132.318
259694_at	UDP-glucose 4-epimerase, putative / UDP-galactose 4-epimerase, putative / Galactowaldenase, putative	AT1G63180	1.856e-05	0.0003025	223.156	49.0719	403.495	30.1221
259711_at	heat shock transcription factor family protein	AT1G77570	1.87e-05	0.0003044	68.69	26.5202	157.952	33.3798
250670_at	polygalacturonase inhibiting protein 1 (PGIP1)	AT5G06860	1.896e-05	0.0003069	165.883	17.9845	320.969	32.5992
249990_at	periplasmic cytochrome C-related	AT5G18540	1.923e-05	0.0003102	20.7764	4.27335	44.0281	5.09598
259347_at	Gar1 RNA-binding region family protein	AT3G03920	1.935e-05	0.0003117	875.024	121.67	1372.78	101.923
263823_s_at	AP2 domain-containing transcription factor, putative (DREB2)	AT2G40340 : AT2G40350	1.939e-05	0.0003119	45.6799	24.326	106.953	4.37175
254275_at	tetratricopeptide repeat (TPR)-containing protein	AT4G22670	1.949e-05	0.0003132	500.083	134.85	924.086	53.2019
260682_at	expressed protein	AT1G17510	1.959e-05	0.0003144	415.638	45.4281	714.108	81.1711
262014_at	expressed protein	AT1G35660	2.017e-05	0.0003222	10.9475	1.8605	22.4253	5.008
263766_at	RNA recognition motif (RRM)-containing protein	AT2G21440	2.022e-05	0.0003225	97.8628	27.3254	198.207	19.0507
250868_at	malate synthase, putative	AT5G03860	2.072e-05	0.0003292	8517.64	665.096	11231.4	458.879
259595_at	zinc finger (B-box type) family protein	AT1G28050	2.081e-05	0.0003301	25.1794	6.34788	54.1397	5.81252
260191_at	protein kinase family protein	AT1G67580	2.091e-05	0.0003312	113.021	24.7972	228.682	31.2998
267500_s_at	cytochrome P450 family protein	AT2G44890 : AT2G45510	2.124e-05	0.000336	1025.46	125.158	1595.63	88.4266
260069_at	Ssu72-like family protein	AT1G73820	2.134e-05	0.0003368	104.393	16.5776	204.761	21.8127
257717_at	expressed protein	AT3G18390	2.142e-05	0.0003373	14.6129	2.71399	30.0467	5.05024
254501_at	ribulose-1,5 bisphosphate carboxylase/oxygenase large subunit N-methyltransferase-related	AT4G20130	2.16e-05	0.0003393	4.59061	0.133873	6.73228	0.44377
262220_at	calcium-dependent protein kinase, putative / CDPK, putative	AT1G74740	2.16e-05	0.0003393	35.6617	7.54023	71.4893	0.285793
260282_at	acetyltransferase-related	AT1G80410	2.169e-05	0.0003397	41.4736	10.0813	93.8316	8.88088
259717_at	cleavage and polyadenylation specificity factor, putative	AT1G61010	2.213e-05	0.0003437	52.304	4.82365	109.25	15.8573
265816_s_at	elongation factor 1-beta, putative / EF-1-beta, putative	AT1G30230 : AT2G18110	2.239e-05	0.0003465	867.146	89.1828	1362.49	183.106
263636_at	expressed protein	AT2G11910	2.273e-05	0.0003504	77.1737	16.6457	161.438	25.3661
246262_at	pentatricopeptide (PPR) repeat-containing protein	AT1G31790	2.278e-05	0.0003508	158.93	30.4929	317.953	23.66
246499_at	RNA recognition motif (RRM)-containing protein	AT5G16260	2.322e-05	0.0003572	93.8568	5.61742	176.091	10.8426
256466_at	plastid developmental protein DAG, putative	AT1G32580	2.334e-05	0.0003577	40.5117	3.12749	83.1174	3.29524
261972_at	expressed protein	AT1G64600	2.382e-05	0.0003641	28.6104	5.87034	61.1349	6.88126
260782_at	UBX domain-containing protein	AT1G14570	2.397e-05	0.0003659	1003	60.7964	1506	96.5176
261909_at	nucleoporin family protein	AT1G80680	2.405e-05	0.0003667	38.5528	6.63309	79.0261	9.93021
267003_at	expressed protein	AT2G34340	2.421e-05	0.0003678	38.4593	9.95312	85.9342	21.2137
245868_at	amino acid permease family protein	AT1G58030	2.439e-05	0.0003697	724.028	157.188	1225.98	111.703
253396_at	RNA recognition motif (RRM)-containing protein	AT4G32720	2.516e-05	0.000379	264.736	47.3068	463.488	20.5775
250833_at	expressed protein	AT5G04540	2.6e-05	0.0003899	742.232	111.489	1196.05	42.1862
260889_at	expressed protein	AT1G29120	2.66e-05	0.000398	149.127	29.3165	284.314	10.2462
246064_at	RNA-binding protein 45 (RBP45), putative	AT5G19350	2.719e-05	0.0004058	831.026	92.079	1278.1	61.9732
261135_at	plant defensin-fusion protein, putative (PDF1.4)	AT1G19610	2.749e-05	0.0004093	10.0311	0.597916	19.8321	5.15754
266121_at	zinc finger (CCCH-type) family protein	AT2G02160	2.788e-05	0.0004131	38.0393	8.31938	78.6335	10.8066
251951_s_at	expressed protein	AT1G55710 : AT3G53630 : AT4G18690	2.79e-05	0.0004131	637.701	138.441	1106.17	87.6636
257703_at	RNA recognition motif (RRM)-containing protein	AT3G12640	2.816e-05	0.0004153	252.079	7.49891	460.766	84.267
261294_at	dihydroxyacetone kinase family protein	AT1G48430	2.845e-05	0.0004185	11.8695	2.09042	22.1184	1.61459
257004_s_at	(S)-2-hydroxy-acid oxidase, peroxisomal, putative / glycolate oxidase, putative / short chain alpha-hydroxy acid oxidase, putative	AT3G14130 : AT3G14150	2.85e-05	0.0004189	907.018	122.638	1407.54	99.2109
249527_at	proline oxidase, putative / osmotic stress-responsive proline dehydrogenase, putative	AT5G38710	2.867e-05	0.0004203	338.428	111.37	737.604	208.062
246114_at	raffinose synthase family protein / seed imbibition protein, putative (din10)	AT5G20250	2.876e-05	0.0004212	383.379	46.125	739.963	182.35
248010_at	peroxisomal targeting signal type 1 receptor (PEX5)	AT5G56290	2.909e-05	0.000425	636.876	62.8087	1059.92	32.7444
255382_at	pre-mRNA splicing factor-related	AT4G03430	2.95e-05	0.0004294	70.1346	18.8422	154.909	18.7278
267099_at	apurinic endonuclease-redox protein / DNA-(apurinic or apyrimidinic site) lyase	AT2G41460	2.954e-05	0.0004295	63.0039	8.2193	117.712	7.59919
267405_at	copper-binding protein (CUTA)	AT2G33740	2.976e-05	0.0004322	491.444	4.52651	806.243	50.0257
261838_at	heat shock protein 70, putative / HSP70, putative	AT1G16030	3.001e-05	0.0004344	2714.28	616.596	4291.36	251.471
254270_at	glutamate-cysteine ligase / gamma-glutamylcysteine synthetase (GSH1)	AT4G23100	3.129e-05	0.0004499	1550.23	303.233	2415.6	79.041
247155_at	2-oxoglutarate dehydrogenase E1 component, putative / oxoglutarate decarboxylase, putative / alpha-ketoglutaric dehydrogenase, putative	AT5G65750	3.177e-05	0.0004551	262.315	29.7378	458.099	46.4267
266294_at	17.6 kDa class I small heat shock protein (HSP17.6B-CI)	AT2G29500	3.184e-05	0.0004556	137.046	25.2977	253.775	20.2564
252114_at	strictosidine synthase family protein	AT3G51450	3.237e-05	0.0004612	106.539	16.0595	196.334	7.1926
246191_at	chaperonin, putative	AT5G20890	3.252e-05	0.0004626	436.651	15.9255	718.849	40.013
260049_at	DNA-directed RNA polymerase family protein	AT1G29940	3.324e-05	0.0004714	122.658	20.8757	251.715	45.696
263947_at	expressed protein	AT2G35820	3.346e-05	0.0004735	31.0957	4.11185	64.4601	5.56467
249038_at	zinc finger (C3HC4-type RING finger) family protein	AT5G44280	3.357e-05	0.0004745	289.441	76.9628	529.764	54.7034
246030_at	L-ascorbate oxidase, putative	AT5G21105	3.39e-05	0.000478	527.03	120.76	1070.14	332.971
266822_at	60S ribosomal protein L24, putative	AT2G44850 : AT2G44860	3.396e-05	0.0004783	375.662	48.2205	649.002	50.7734
252515_at	17.4 kDa class I heat shock protein (HSP17.4-CI)	AT3G46230	3.43e-05	0.0004815	8164.47	1124.03	11104.2	200.988
250845_at	RNA recognition motif (RRM)-containing protein	AT5G04600	3.452e-05	0.0004841	367.876	52.0761	592.688	25.2863
249916_at	histone H2B, putative	AT5G22880	3.456e-05	0.0004841	25.5344	1.41255	52.2339	9.76488
263375_s_at	prohibitin, putative	AT2G20530 : AT4G28510	3.46e-05	0.0004841	1289.68	118.373	1879.29	129.305
267474_at	transcription factor, putative	AT2G02740	3.474e-05	0.0004855	38.4656	8.16537	75.7692	5.62382
256785_at	prenylated rab acceptor (PRA1) family protein	AT3G13720	3.502e-05	0.0004881	64.2048	6.34395	120.061	6.36281
247953_at	cytochrome P450 71B10	AT5G57260	3.504e-05	0.0004881	716.474	74.2875	1132.29	112.067
261243_at	hypothetical protein	AT1G20180	3.585e-05	0.0004983	458.26	39.2093	794.431	149.187
266932_s_at	DEAD box RNA helicase, putative	AT1G63250 : AT2G07750	3.614e-05	0.0005018	14.4136	4.84574	28.8791	1.89635
259397_at	transcription factor-related	AT1G17680	3.626e-05	0.0005028	112.817	16.866	213.187	23.6069
245120_at	expressed protein	AT2G39810	3.653e-05	0.000506	37.8831	2.25274	75.3919	13.5096
250863_at	F1F0-ATPase inhibitor protein, putative	AT5G04750	3.697e-05	0.0005102	440.43	101.483	776.287	86.2091
264929_at	aldo/keto reductase family protein	AT1G60730	3.699e-05	0.0005102	30.5119	5.02135	65.3104	8.96544
254839_at	stress-inducible protein, putative	AT4G12400	3.783e-05	0.0005206	9.78999	2.88583	20.2424	4.3853
259649_at	TATA-binding protein-associated factor TAFII55 family protein	AT1G55300	3.8e-05	0.0005223	23.3993	5.67915	50.5801	7.17613
258780_at	ubiquitin-specific protease, putative	AT3G11910	3.828e-05	0.0005257	864.375	109.462	1290.45	46.0372
245115_at	esterase, putative	AT2G41530	3.869e-05	0.0005307	116.367	23.8949	214.791	5.82629
258705_at	expressed protein	AT3G09470	3.907e-05	0.0005348	14.0515	1.22845	28.7368	7.17493
262505_at	expressed protein	AT1G21680	3.924e-05	0.0005359	471.598	51.6505	770.634	59.6206
264821_at	kinase interacting family protein	AT1G03470	3.928e-05	0.0005359	854.926	232.593	1433.65	87.1556
253392_at	inward rectifying potassium channel, putative (KAT3) (AKT4) (KC1)	AT4G32650	3.955e-05	0.0005384	18.7249	1.36117	38.262	8.58692
245194_at	protein phosphatase 2C, putative / PP2C, putative	AT1G67820	3.992e-05	0.0005415	261.367	51.7106	468.477	56.5265
250287_at	AP2 domain-containing transcription factor family protein	AT5G13330	4.088e-05	0.0005535	2016.19	156.515	2876.28	59.2845
246548_at	heavy-metal-associated domain-containing protein	AT5G14910	4.147e-05	0.0005603	66.0405	8.15355	125.751	7.07506
254368_at	DNA-directed RNA polymerase II 135 kDa polypeptide / RNA polymerase II subunit 2 (RPB135) (RPB2) (RP140)	AT4G21710	4.153e-05	0.0005605	225.645	75.9914	463.23	78.5048
245347_at	ferredoxin family protein	AT4G14890	4.177e-05	0.0005626	8.34448	1.90334	14.9316	2.68983
264317_at	spermidine synthase 2 (SPDSYN2) / putrescine aminopropyltransferase 2	AT1G70310	4.184e-05	0.0005628	71.6071	9.27008	150.319	30.5469
264170_at	transmembrane protein, putative	AT1G02260	4.199e-05	0.0005643	46.0168	4.04805	93.2852	3.82313
245699_at	OTU-like cysteine protease family protein	AT5G04250	4.23e-05	0.0005671	580.601	41.9449	898.776	84.2262
255015_at	methyltransferase MT-A70 family protein	AT4G09980	4.237e-05	0.0005671	10.0391	0.790315	17.1361	1.19115
255497_at	basic helix-loop-helix (bHLH) family protein	AT4G02590	4.238e-05	0.0005671	42.4443	6.53819	84.5924	10.716
246831_at	hexose transporter, putative	AT5G26340	4.303e-05	0.0005751	198.358	40.2175	364.752	35.5056
260648_at	zinc finger (C3HC4-type RING finger) family protein	AT1G08050	4.312e-05	0.0005751	149.304	34.3261	282.268	20.3134
259037_at	armadillo/beta-catenin repeat family protein	AT3G09350	4.316e-05	0.0005751	601.838	36.4825	923.737	84.6784
258812_at	expressed protein	AT3G03950	4.326e-05	0.0005758	142.695	16.3886	275.512	16.0775
266803_at	protein kinase (APK1b)	AT2G28930	4.506e-05	0.0005954	11.1981	1.23531	22.0961	4.49179
261535_at	expressed protein	AT1G01720 : AT1G01725	4.535e-05	0.0005979	26.4703	6.49702	52.9592	6.87154
249404_at	ankyrin repeat family protein (EMB506)	AT5G40160	4.55e-05	0.0005987	19.154	2.78892	36.475	1.80594
260567_at	UDP-glucoronosyl/UDP-glucosyl transferase family protein	AT2G43820	4.57e-05	0.0006007	1508.1	45.1738	2411.18	498.938
262844_at	invertase/pectin methylesterase inhibitor family protein	AT1G14890	4.599e-05	0.0006035	8.63624	1.62165	17.8805	6.61337
261551_at	copper-exporting ATPase, putative / responsive-to-antagonist 1, putative / copper-transporting ATPase, putative	AT1G63440	4.613e-05	0.0006038	289.491	22.7994	499.683	41.6561
250555_at	expressed protein	AT5G07950	4.623e-05	0.0006039	44.5776	1.87486	88.34	9.46489
247677_at	oxysterol-binding family protein	AT5G59420	4.654e-05	0.0006073	932.693	25.7744	1372.35	62.3167
256349_at	late embryogenesis abundant protein-related / LEA protein-related	AT1G54890	4.755e-05	0.0006191	163.618	36.9085	336.46	97.7149
264709_at	myb family transcription factor	AT1G09770	4.771e-05	0.0006206	110.621	19.9664	203.181	29.4506
266340_at	expressed protein	AT2G01480	4.777e-05	0.0006207	37.1992	6.88194	71.8658	6.931
266957_at	expressed protein	AT2G34640	4.803e-05	0.0006235	15.4097	1.82858	29.2039	2.81851
267246_at	WRKY family transcription factor	AT2G30250	4.814e-05	0.000624	49.2627	2.46017	107.346	22.158
253524_at	expressed protein	AT4G31430	4.854e-05	0.0006281	224.201	49.8482	400.181	50.2832
253484_at	transcription initiation factor IID (TFIID) 23-30kDa subunit (TAF2H) family protein	AT4G31720	4.86e-05	0.0006283	606.983	18.4864	912.493	8.31162
250787_at	E3 ubiquitin ligase, putative	AT5G05560	4.89e-05	0.0006315	18.3018	1.58485	36.7745	8.60439
258846_at	NADH-ubiquinone oxidoreductase-related	AT3G03070	4.962e-05	0.0006393	1136.35	154.586	1699.78	69.2914
263371_at	nucleolar RNA-binding Nop10p family protein	AT2G20490	4.966e-05	0.0006393	240.936	21.7996	426.565	40.3912
261348_at	Pex2/Pex12 N-terminal domain-containing protein / zinc finger (C3HC4-type RING finger) family protein	AT1G79810	4.983e-05	0.0006402	205.504	34.9199	366.11	46.6149
261335_at	nodulin MtN21 family protein	AT1G44800	5.005e-05	0.0006424	402.779	26.0309	651.815	50.5617
260785_at	expressed protein	AT1G06200	5.076e-05	0.0006502	1123.58	219.425	1706.28	36.5375
245054_at	RED family protein	AT2G26460	5.111e-05	0.0006534	135.726	20.5918	254.503	35.9449
257146_at	DNA-binding bromodomain-containing protein	AT3G27260	5.112e-05	0.0006534	252.538	60.5723	468.674	34.5331
246254_at	mitogen-activated protein kinase, putative / MAPK, putative (MPK14)	AT4G36450	5.127e-05	0.0006547	11.4021	1.7501	26.1847	10.8728
247547_at	expressed protein	AT5G61360	5.176e-05	0.0006599	4.30959	0.176838	6.13397	0.232072
262800_at	U5 small nuclear ribonucleoprotein helicase, putative	AT1G20960	5.179e-05	0.0006599	352.318	61.7727	575.614	48.6722
247014_at	DNA helicase, putative	AT5G67630	5.2e-05	0.000662	59.2829	11.2292	115.134	1.67225
264637_at	allyl alcohol dehydrogenase, putative	AT1G65560	5.294e-05	0.0006712	26.0343	6.29851	51.0885	2.28984
260283_at	PRLI-interacting factor L, putative	AT1G80480	5.315e-05	0.0006732	46.2021	9.99791	98.6522	9.67387
257652_at	pumilio/Puf RNA-binding domain-containing protein	AT3G16810	5.333e-05	0.0006748	67.651	9.95084	135.81	17.0914
248508_at	radical SAM domain-containing protein / GCN5-related N-acetyltransferase (GNAT) family protein	AT5G50320	5.356e-05	0.0006771	319.984	48.7978	539.314	24.335
247528_at	structural maintenance of chromosomes (SMC) family protein	AT5G61460	5.393e-05	0.000681	20.5404	2.22964	39.1673	0.728989
267004_at	transducin family protein / WD-40 repeat family protein	AT2G34260	5.422e-05	0.000684	17.6341	1.92246	33.6698	2.623
247422_at	peroxisomal protein (PEX14)	AT5G62810	5.454e-05	0.0006874	731.498	98.0679	1132.6	51.9061
260127_at	expressed protein	AT1G36320	5.489e-05	0.000691	270.572	12.169	459.483	53.3402
260101_at	trypsin and protease inhibitor family protein / Kunitz family protein	AT1G73260	5.511e-05	0.0006922	290.667	123.457	577.677	53.2186
260561_at	chitinase, putative	AT2G43580	5.515e-05	0.0006922	8.09366	0.821559	14.8365	3.95778
257922_at	ethylene receptor, putative (ETR2)	AT3G23150	5.525e-05	0.0006929	4.71157	0.775738	7.09415	0.805757
249826_at	superoxide dismutase (Fe) / iron superoxide dismutase 3 (FSD3)	AT5G23310	5.615e-05	0.000702	8.15021	1.74182	13.9566	0.672547
246060_at	expressed protein	AT5G08420	5.711e-05	0.0007096	40.2872	11.493	81.6865	15.1308
251311_at	COP9 signalosome complex subunit 1 / CSN complex subunit 1 (CSN1) / COP11 protein (COP11) / FUSCA protein (FUS6)	AT3G61140	5.718e-05	0.0007096	236.686	26.0082	407.197	32.1736
262001_at	jacalin lectin family protein	AT1G33790	5.721e-05	0.0007096	288.597	7.37456	491.02	33.0623
245817_at	metal-dependent phosphohydrolase HD domain-containing protein	AT1G26160	5.74e-05	0.0007113	421.485	71.5807	682.026	18.565
250333_at	mitochondrial import inner membrane translocase subunit Tim17, putative	AT5G11690	5.746e-05	0.0007113	5.68485	0.21443	8.56315	0.764717
257189_at	expressed protein	AT3G13222	5.756e-05	0.0007114	10.1322	1.14075	17.1096	1.3941
246052_at	pentatricopeptide (PPR) repeat-containing protein	AT5G08310	5.758e-05	0.0007114	19.0706	3.05491	36.182	3.34412
255136_s_at	KOW domain-containing protein	AT4G08350 : AT4G08360	5.808e-05	0.0007169	317.359	28.9348	519.829	13.3655
266574_at	5' nucleotidase family protein	AT2G23890	5.865e-05	0.0007231	19.1814	3.51971	36.2693	3.27008
260345_at	leucine-rich repeat family protein / protein kinase family protein	AT1G69270	5.911e-05	0.0007274	188.162	24.7118	316.021	34.3425
266556_at	expressed protein	AT2G46230	5.922e-05	0.000728	826.777	64.1929	1241.71	45.2574
251823_at	SET domain-containing protein	AT3G55080	5.95e-05	0.0007305	16.4658	0.941507	28.7725	3.14434
266772_s_at	heat shock protein-related	AT2G03020 : AT4G16540	5.961e-05	0.0007305	13.6879	2.19299	25.4585	3.6916
252338_at	cytochrome b5 domain-containing protein	AT3G48890	5.992e-05	0.0007324	175.639	6.58313	304.347	8.9113
257772_at	expressed protein	AT3G23080	6.014e-05	0.0007344	20.5559	0.750057	39.6907	4.23666
267268_at	expressed protein	AT2G02570	6.045e-05	0.0007365	816.861	140.431	1272.13	24.3494
253566_at	DNA topoisomerase family protein	AT4G31210	6.046e-05	0.0007365	16.5872	1.1292	30.8251	4.60193
248045_at	heat shock protein 81-4 (HSP81-4)	AT5G56030	6.049e-05	0.0007365	977.024	123.488	1436.45	87.4031
252031_at	tetratricopeptide repeat (TPR)-containing protein	AT3G52140	6.061e-05	0.0007365	148.096	22.6774	299.574	79.6562
263116_s_at	splicing factor Prp18 family protein	AT1G03140 : AT1G54590	6.079e-05	0.000738	1427.72	29.8064	2129	308.228
245513_at	synaptobrevin-related family protein	AT4G15780	6.175e-05	0.0007477	273.2	63.334	493.065	51.0444
265086_at	zinc finger (C3HC4-type RING finger) family protein	AT1G03770	6.186e-05	0.0007481	164.69	41.4922	314.038	30.9836
261701_at	HAC13 protein (HAC13)	AT1G32750	6.219e-05	0.0007513	960.179	41.1192	1368.14	36.5508
246557_at	expressed protein	AT5G15510	6.338e-05	0.0007643	23.2457	4.30071	45.6152	1.91783
253492_at	enoyl-CoA hydratase/isomerase family protein	AT4G31810	6.373e-05	0.0007678	13.5449	1.73558	23.9965	1.59203
254203_at	expressed protein	AT4G24150	6.425e-05	0.0007733	206.141	45.4103	363.286	32.1738
253432_at	pentatricopeptide (PPR) repeat-containing protein	AT4G32450	6.45e-05	0.0007756	8.64122	1.77702	15.246	3.045
260728_at	serine/threonine protein kinase, putative	AT1G48210	6.463e-05	0.0007764	32.7396	2.13368	67.3904	8.83772
246237_at	radical SAM domain-containing protein / TRAM domain-containing protein	AT4G36390	6.519e-05	0.0007816	100.553	10.5307	195.232	39.9546
250680_at	expressed protein	AT5G06570	6.543e-05	0.0007837	9.34461	0.877618	19.0837	7.83135
265946_s_at	WD-40 repeat protein (MSI4)	AT2G19520 : AT4G29730	6.584e-05	0.0007876	353.588	74.1629	573.402	34.4347
266053_at	HEAT repeat-containing protein	AT2G40730	6.588e-05	0.0007876	15.2312	3.37251	31.7246	8.45695
253046_at	cytochrome P450, putative	AT4G37370	6.65e-05	0.0007943	502.727	90.1214	849.863	101.587
248258_at	nuclear movement family protein	AT5G53400	6.724e-05	0.0008012	766.227	50.5056	1174.47	92.0309
250367_s_at	DEAD/DEAH box helicase, putative (RH15)	AT5G11170 : AT5G11200	6.778e-05	0.0008058	1527.48	64.1306	2221.13	61.5131
255943_at	UDP-glucoronosyl/UDP-glucosyl transferase family protein	AT1G22370	6.821e-05	0.0008101	91.7292	30.9368	183.071	17.1211
265225_at	PHD finger transcription factor, putative	AT2G36720	6.842e-05	0.000811	39.2034	14.5606	79.7409	9.19188
254685_at	auxin-responsive protein, putative	AT4G13790	6.848e-05	0.000811	8.27228	2.28209	18.3075	8.04594
254873_at	eukaryotic translation initiation factor 3 subunit 10 / eIF-3 theta / eIF3a (TIF3A1)	AT4G11420	6.923e-05	0.0008182	97.1036	19.9483	176.436	5.4484
251542_at	ankyrin protein kinase, putative	AT3G58760	7.051e-05	0.000828	71.7221	1.85064	134.284	22.0238
264452_at	pentatricopeptide (PPR) repeat-containing protein	AT1G10270	7.106e-05	0.0008321	20.0811	3.59899	43.4704	12.7898
265940_at	nucleosome assembly protein (NAP), putative	AT2G19480	7.126e-05	0.0008334	1022.35	137.808	1525.04	93.2895
260160_at	La domain-containing protein	AT1G79880	7.131e-05	0.0008334	24.2867	1.52821	44.1266	1.21475
259073_at	zinc finger (C3HC4-type RING finger) family protein	AT3G02290	7.138e-05	0.0008334	109.943	8.14897	198.962	27.8397
254057_at	expressed protein	AT4G25170	7.143e-05	0.0008334	4184.21	518.437	5955.71	495.381
263403_at	MATE efflux family protein	AT2G04040	7.237e-05	0.0008435	140.736	25.4375	266.253	23.1182
248882_at	cullin, putative	AT5G46210	7.291e-05	0.0008482	812.043	58.5439	1215.46	58.0803
258313_at	Ran-binding protein 1 domain-containing protein / RanBP1 domain-containing protein	AT3G15970	7.363e-05	0.0008544	103.82	36.8863	199.992	7.48332
258735_at	hydrophobic protein (RCI2A) / low temperature and salt responsive protein (LTI6A)	AT3G05880	7.364e-05	0.0008544	6895.21	829.102	9522.98	766.08
260323_at	brix domain-containing protein	AT1G63780	7.431e-05	0.0008614	64.545	4.84146	113.846	6.68717
253558_at	Skb1 methyltransferase family protein	AT4G31120	7.51e-05	0.0008689	47.5429	17.0137	105.721	20.3007
256936_at	prefoldin-related KE2 family protein	AT3G22480	7.597e-05	0.0008781	56.2144	10.2332	105.098	10.5424
253977_at	expressed protein	AT4G26630	7.634e-05	0.0008816	929.029	193.802	1461.74	113.225
250693_at	ubiquitin-specific protease 12 (UBP12)	AT5G06600	7.81e-05	0.0008995	428.065	92.1653	726.188	58.5533
249326_at	cohesion family protein SYN2 (SYN2)	AT5G40840	7.887e-05	0.0009067	90.2863	26.197	178.447	16.0614
252210_at	Dof-type zinc finger domain-containing protein	AT3G50410	7.902e-05	0.0009076	10.1781	0.565249	17.2046	2.7516
257092_at	forkhead-associated domain-containing protein / FHA domain-containing protein	AT3G20550	7.956e-05	0.000913	114.338	35.6426	223.41	32.9389
248362_at	fibrillarin 1 (FBR1) (FIB1) (SKIP7)	AT5G52470	8.006e-05	0.0009161	1211.32	82.3623	1740.73	77.7115
260138_at	calmodulin-1/4 (CAM4)	AT1G66410	8.016e-05	0.0009164	2860.02	141.972	3984.75	316.306
251073_at	expressed protein	AT5G01750	8.095e-05	0.0009213	1429.15	290.235	2189.35	91.9457
248465_at	expressed protein	AT5G51200	8.147e-05	0.0009261	17.477	5.88294	37.1091	9.04199
260031_at	expressed protein	AT1G68790	8.151e-05	0.0009261	259.859	18.6601	427.007	39.4028
265337_at	ADP-ribosylation factor-like protein 2 (ARL2)	AT2G18390	8.218e-05	0.000932	61.4342	9.0003	115.101	14.9839
258215_at	chloroplast outer membrane translocon subunit, putative	AT3G17970	8.291e-05	0.0009393	21.4098	3.01313	39.708	3.42552
259055_at	LUC7 N_terminus domain-containing protein	AT3G03340	8.351e-05	0.0009445	167.269	25.3847	307.916	37.1284
263843_at	translin family protein	AT2G37020	8.367e-05	0.0009455	226.994	30.7172	392.026	46.4344
262613_at	WRKY family transcription factor	AT1G13960	8.388e-05	0.0009469	400.027	56.0074	668.643	83.046
248269_at	acyl-CoA binding protein, putative / ACBP, putative	AT5G53470	8.409e-05	0.0009485	589.793	43.7023	873.9	37.5267
262307_at	DNAJ heat shock N-terminal domain-containing protein	AT1G71000	8.57e-05	0.0009649	5.38385	0.718925	8.02052	0.42079
254174_at	transporter, putative	AT4G24120	8.702e-05	0.0009771	556.692	111.454	888.78	30.049
255752_at	secretory carrier membrane protein (SCAMP) family protein	AT1G32050	8.725e-05	0.0009789	1153.77	79.2963	1632.08	37.0524
253027_at	pentatricopeptide (PPR) repeat-containing protein	AT4G38150	8.77e-05	0.0009813	24.7598	1.52175	46.3606	6.09978
267300_at	UDP-glucoronosyl/UDP-glucosyl transferase family protein	AT2G30140	8.982e-05	0.0009979	1024.1	109.91	1504.28	91.9475
250525_at	expressed protein	AT5G08550	9.012e-05	0.001	50.8743	16.6419	111.564	18.1377
254855_s_at	zinc finger (C3HC4-type RING finger) family protein	AT4G12140 : AT4G12150	9.112e-05	0.001009	9.10152	1.36328	16.3781	3.74989
264895_at	10 kDa chaperonin, putative	AT1G23100	9.302e-05	0.001028	16.2514	0.973407	30.7063	6.59137
257218_at	expressed protein	AT3G15000	9.411e-05	0.001037	433.943	42.9621	679.697	27.3571
260487_at	RNA-binding protein, putative	AT1G51510	9.526e-05	0.001048	747.137	111.293	1138.69	3.63871
249925_at	carbohydrate kinase family	AT5G19150	9.684e-05	0.001061	1046.2	134.654	1534.93	62.0031
249888_s_at	zinc finger (ZPR1-type) family protein	AT5G22480 : AT5G37340	9.703e-05	0.001062	243.399	38.9242	422.299	18.8086
259652_at	expressed protein	AT1G55250	9.911e-05	0.001081	11.1301	2.56628	19.4456	0.579328
266514_at	zinc finger (B-box type) family protein	AT2G47890	9.953e-05	0.001085	298.202	26.2939	481.658	25.1735
253213_at	DEAD/DEAH box helicase, putative (RH16)	AT4G34910	0.0001008	0.001097	11.9757	1.34923	20.2934	0.776891
246081_s_at	myosin, putative	AT5G20470 : AT5G20490	0.0001017	0.001104	588.317	224.693	1083.18	89.0681
260465_at	pentatricopeptide (PPR) repeat-containing protein	AT1G10910	0.0001022	0.001107	30.3407	7.91431	58.1306	2.02018
266534_at	RNA recognition motif (RRM)-containing protein	AT2G16940	0.0001026	0.001111	57.6121	18.7156	113.985	9.56737
253942_at	expressed protein	AT4G27010	0.0001036	0.00112	12.7693	2.59699	25.1765	7.18785
259030_at	expressed protein	AT3G09310	0.0001043	0.001126	34.0437	7.23354	68.2737	4.51349
253542_at	ubiquitin carboxyl-terminal hydrolase family protein / zinc finger (MYND type) family protein	AT4G31670	0.0001056	0.001137	190.654	26.5859	309.324	20.3116
245569_at	RNA polymerase Rpb7 N-terminal domain-containing protein	AT4G14660	0.0001061	0.001141	22.5705	5.38574	44.988	7.33376
263448_at	importin beta-2 subunit family protein	AT2G31660	0.0001066	0.001146	6.71381	0.166661	10.6242	1.43915
250402_at	transducin family protein / WD-40 repeat family protein	AT5G10940	0.0001076	0.001153	354.209	30.0493	552.525	15.0762
251507_at	aspartyl protease family protein	AT3G59080	0.0001095	0.001169	10.379	0.535941	20.7312	7.75689
264514_at	cinnamyl-alcohol dehydrogenase family / CAD family	AT1G09500	0.0001099	0.001172	2073.24	295.155	3033.13	358.669
247241_at	expressed protein	AT5G64680	0.0001102	0.001175	210.285	37.3498	356.412	38.2274
259164_at	DNA-binding bromodomain-containing protein	AT3G01770	0.0001122	0.001192	863.497	114.787	1266.45	76.3216
249494_at	transferase family protein	AT5G39050	0.0001125	0.001192	742.575	74.0014	1148.85	168.684
251380_at	expressed protein	AT3G60700	0.000113	0.001195	12.0104	0.951134	20.3756	2.52575
263209_at	expressed protein	AT1G10522	0.000113	0.001195	7.42203	1.30588	11.7455	0.27001
247137_at	calcium-dependent protein kinase family protein / CDPK family protein	AT5G66210	0.0001139	0.001203	20.0391	2.87514	37.9864	4.14571
261512_at	F-actin capping protein beta subunit family protein	AT1G71790	0.0001161	0.001223	138.045	33.2217	251.866	30.9089
254593_s_at	transducin family protein / WD-40 repeat family protein	AT4G18900 : AT4G18905	0.0001173	0.001231	308.821	51.7692	494.222	21.8062
264259_at	expressed protein	AT1G09290	0.0001173	0.001231	33.8248	5.75215	66.7232	2.11443
245100_at	ubiquitin-specific protease 5, putative (UBP5)	AT2G40930	0.0001178	0.001234	140.288	21.2099	253.136	12.9017
254063_at	protein kinase family protein	AT4G25390	0.0001178	0.001234	46.1818	3.27811	90.3729	18.7094
245893_at	expressed protein	AT5G09270	0.0001194	0.00125	102.077	17.8406	185.498	11.6557
259156_at	exocyst complex component-related	AT3G10380	0.0001212	0.001264	366.753	115.242	637.252	64.7442
260815_at	chloroplast inner envelope protein-related	AT1G06950	0.0001216	0.001268	200.136	54.1195	355.031	29.4203
266127_s_at	mitochondrial elongation factor, putative	AT1G45332 : AT2G45030	0.0001218	0.001269	290.974	15.1655	486.957	37.4998
261748_at	expressed protein	AT1G76070	0.0001222	0.001272	146.633	41.5833	274.512	9.02377
262576_at	glycine-rich protein	AT1G15280	0.0001223	0.001272	119.984	14.0996	216.434	9.72155
266839_at	hydroxyproline-rich glycoprotein family protein	AT2G25930	0.0001233	0.001279	72.1403	16.6645	132.387	7.25204
257149_at	prohibitin, putative	AT3G27280	0.0001235	0.00128	61.3895	17.0635	114.53	14.1499
265078_at	expressed protein	AT1G55500	0.0001237	0.001281	223.096	54.5742	386.489	36.2676
261564_at	no apical meristem (NAM) family protein	AT1G01720	0.0001243	0.001285	4639.2	775.728	6734.16	611.043
264053_at	kinase interacting protein-related	AT2G22560	0.0001252	0.00129	116.111	7.90984	231.305	80.3453
266466_at	transducin family protein / WD-40 repeat family protein	AT2G47790	0.0001261	0.001298	267.21	33.5673	437.587	18.7581
258201_at	expressed protein	AT3G13910	0.0001265	0.001301	19.1721	4.49503	36.6062	6.73696
246103_at	SSXT protein-related / glycine-rich protein	AT5G28640	0.0001283	0.001316	14.4142	1.98723	27.2863	5.91885
262468_at	aminoacyl-tRNA synthetase family protein	AT1G50200	0.0001311	0.001342	735.607	130.295	1143.42	101.25
265199_s_at	UDP-glucoronosyl/UDP-glucosyl transferase family protein	AT2G36770 : AT2G36780	0.0001311	0.001342	20.8095	4.82597	42.1139	8.69017
253201_at	ribosomal protein S16 family protein	AT4G34620	0.0001323	0.001353	2015.97	89.6696	2790.26	230.442
252362_at	expressed protein	AT3G48500	0.0001326	0.001355	11.9626	1.52904	20.2509	1.91857
248984_at	DNA-directed RNA polymerase, putative	AT5G45140	0.0001332	0.001359	131.547	54.0125	265.726	19.1695
245649_at	expressed protein	AT1G24706	0.0001335	0.001361	241.903	21.6888	400.516	12.4238
260065_at	zinc finger (C3HC4-type RING finger) family protein	AT1G73760	0.0001336	0.001361	66.7396	4.62231	134.414	36.3075
257196_at	AMP-binding protein, putative	AT3G23790	0.0001349	0.001372	537.426	102.187	832.956	74.3707
246210_at	ribosomal protein L12 family protein	AT4G36420	0.0001352	0.001373	19.5106	1.60182	35.3089	4.6789
247279_at	arabinogalactan-protein (AGP1)	AT5G64310	0.0001355	0.001375	219.593	55.8327	393.836	72.7712
265111_at	protease inhibitor/seed storage/lipid transfer protein (LTP) family protein	AT1G62510	0.0001389	0.001405	949.305	181.318	1441.92	120.014
261280_at	expressed protein	AT1G05860	0.0001392	0.001407	14.0859	1.60774	25.7814	3.98193
253114_at	Ras-related GTP-binding protein, putative	AT4G35860	0.0001394	0.001407	1647.5	56.6337	2345.24	132.957
250033_at	novel cap-binding protein (nCBP)	AT5G18110	0.0001395	0.001407	151.017	8.41638	251.577	6.10755
250332_at	expressed protein	AT5G11680	0.0001395	0.001407	1071.1	130.134	1526.46	78.8957
253935_at	aspartyl-tRNA synthetase, putative / aspartate--tRNA ligase, putative	AT4G26870	0.0001406	0.001415	24.988	4.36648	44.9046	3.99343
265992_at	leucine-rich repeat transmembrane protein kinase, putative	AT2G24130	0.0001415	0.001424	6.37766	0.420847	11.6281	4.11113
252677_at	nitrilase 3 (NIT3)	AT3G44320	0.000142	0.001427	362.482	23.49	555.551	30.3626
250616_at	leucine-rich repeat protein kinase, putative / extra sporogenous cells (ESP)	AT5G07280	0.0001425	0.00143	66.7645	4.08771	127.661	24.3358
263633_at	scarecrow-like transcription factor 21 (SCL21)	AT2G04890	0.0001427	0.001431	57.4843	14.5466	119.148	39.9279
264945_at	MADS-box protein (MAF3)	AT1G77080	0.0001431	0.001433	15.8912	1.60571	27.9059	1.05689
247443_at	integral membrane HPP family protein	AT5G62720	0.0001432	0.001433	13.6124	2.00312	25.5482	7.43113
251175_at	homocysteine S-methyltransferase 2 (HMT-2)	AT3G63250	0.0001434	0.001434	23.1658	4.78044	43.8942	6.96736
261333_at	FF domain-containing protein / WW domain-containing protein	AT1G44910	0.0001434	0.001434	154.042	26.3121	264.871	13.3367
251931_at	glyoxal oxidase-related	AT3G53950	0.0001441	0.001439	8.33614	0.998577	13.0822	1.40436
250238_at	MutT/nudix family protein	AT5G13570	0.0001445	0.001442	99.7698	1.9507	194.269	55.5197
255799_at	light-mediated development protein 1 / deetiolated1 (DET1)	AT4G10180	0.0001451	0.001447	89.0936	16.0293	169.561	21.2225
262876_at	DSS1/SEM1 family protein	AT1G64750	0.0001453	0.001448	430.651	15.3924	676.986	62.2875
248969_at	expressed protein	AT5G45310	0.0001455	0.001449	2718.68	314.204	3775.47	189.948
248985_at	root hair defective 3 GTP-binding (RHD3) family protein	AT5G45160	0.0001468	0.00146	649.424	93.7213	1009.01	62.6024
246958_at	expressed protein	AT5G24690	0.0001469	0.00146	818.514	58.0532	1196.91	51.5964
262348_at	PWWP domain-containing protein	AT2G48160	0.0001507	0.001497	67.1388	18.294	140.392	39.8653
264224_at	expressed protein	AT1G67440	0.0001535	0.001521	17.9012	2.10048	31.9435	2.92992
254526_at	cyclin family protein	AT4G19600	0.0001542	0.001526	200.846	47.1337	355.48	26.3153
261159_s_at	cyclin 1b (CYC1b)	AT1G34460 : AT5G06150	0.000155	0.00153	14.0484	5.60143	27.4432	1.0335
258164_at	surfeit 1 (SURF1)	AT3G17910	0.0001563	0.001541	19.6644	3.84902	36.0339	1.6837
260619_at	lactoylglutathione lyase, putative / glyoxalase I, putative	AT1G08110	0.0001571	0.001548	318.151	42.0706	504.401	21.1832
259259_at	gibberellin signal transduction protein (SPINDLY)	AT3G11540	0.0001573	0.001548	93.87	43.3815	198.328	17.8557
255070_at	isoamylase, putative / starch debranching enzyme, putative	AT4G09020	0.0001582	0.001553	5.66884	0.94292	8.51975	0.745113
262631_at	expressed protein	AT1G06500	0.00016	0.001568	34.8221	5.9508	67.2846	11.568
263022_s_at	gamma-adaptin, putative	AT1G23900 : AT1G23940	0.00016	0.001568	17.4447	0.610425	31.0871	4.6772
251866_at	forkhead-associated domain-containing protein / FHA domain-containing protein	AT3G54350	0.0001614	0.001579	138.317	24.0007	245.448	26.5678
251642_at	alkaline alpha galactosidase, putative	AT3G57520	0.0001628	0.00159	184.514	7.8911	372.972	155.239
265203_at	expressed protein	AT2G36630	0.0001644	0.001604	47.1774	4.99403	98.306	26.983
253883_at	expressed protein	AT4G27660	0.0001645	0.001604	5.05351	0.806982	7.2315	0.382235
251666_at	cystathionine beta-lyase, chloroplast / beta-cystathionase / cysteine lyase (CBL)	AT3G57050	0.0001663	0.001617	154.165	11.915	274.183	38.2226
252492_at	chloroplast outer envelope protein, putative	AT3G46740	0.0001675	0.001626	93.284	5.93018	167.643	18.2618
255077_at	T-complex protein 11	AT4G09150	0.0001682	0.001631	433.578	96.6641	713.356	67.6359
266471_at	elongation factor family protein	AT2G31060	0.0001684	0.001631	26.3032	5.91148	49.2916	3.91581
251257_at	ADP-ribosylation factor	AT3G62290	0.0001687	0.001631	3420.5	224.92	4572.77	76.2379
259066_at	expressed protein	AT3G07530	0.0001693	0.001636	44.4727	2.84757	80.6876	7.59218
258545_at	GTP-binding family protein	AT3G07050	0.0001697	0.001639	43.1494	16.551	88.8892	8.65696
258533_at	expressed protein	AT3G06670	0.0001703	0.001644	106.411	19.8648	189.551	16.3806
249019_at	expressed protein	AT5G44780	0.0001706	0.001645	12.8442	3.11486	24.6004	6.3705
256068_at	RNA recognition motif (RRM)-containing protein	AT1G13690	0.0001736	0.001669	221.004	18.8353	360.721	55.8968
260949_at	F-box family protein	AT1G06110	0.0001742	0.001673	638.222	89.3233	995.886	19.561
248547_at	pentatricopeptide (PPR) repeat-containing protein	AT5G50280	0.000175	0.001679	17.7985	5.16004	35.3467	9.31397
248081_at	hydroxyproline-rich glycoprotein family protein	AT5G55390	0.0001758	0.001682	322.152	29.9633	514.477	38.541
246249_at	pentatricopeptide (PPR) repeat-containing protein	AT4G36680	0.000176	0.001682	16.2348	2.75702	28.1937	2.22956
248850_at	DNA-binding bromodomain-containing protein	AT5G46550	0.0001775	0.001694	19.6225	0.907432	34.4758	2.70951
250286_at	auxin-responsive GH3 family protein	AT5G13320	0.0001786	0.001704	229.641	46.4741	409.086	91.1667
256343_at	radical SAM domain-containing protein / TRAM domain-containing protein	AT1G72090	0.0001804	0.001718	6.92053	0.713756	10.4935	0.401776
267251_at	casein kinase II alpha chain, putative	AT2G23070	0.0001805	0.001718	816.343	9.87402	1172.05	27.5379
265481_at	expressed protein	AT2G15960	0.0001807	0.001718	3132.9	65.0468	4124.09	182.988
249813_at	transferase family protein	AT5G23940	0.0001811	0.00172	6.98949	0.709931	11.0427	1.53892
251145_at	expressed protein	AT3G63500	0.0001819	0.001726	275.286	33.1931	451.951	46.6136
251798_at	SC35-like splicing factor, 30 kD (SCL30)	AT3G55460	0.0001832	0.001736	590.522	81.8534	872.763	13.1076
245903_at	C2 domain-containing protein	AT5G11100	0.0001838	0.001739	12.078	0.814046	20.5591	3.26239
245063_at	mitochondrial glycoprotein family protein / MAM33 family protein	AT2G39795	0.0001847	0.001746	224.684	27.0372	362.557	15.9194
247364_at	tetratricopeptide repeat (TPR)-containing protein	AT5G63200	0.000186	0.001758	49.7618	10.2883	97.8537	5.349
251740_at	peptidyl-prolyl cis-trans isomerase, putative / cyclophilin, putative / rotamase, putative	AT3G56070	0.0001888	0.001783	408.489	65.4608	625.31	32.2221
253603_at	WRKY family transcription factor	AT4G30935	0.0001892	0.001785	798.13	226.541	1267.64	23.3543
251153_at	NPL4 family protein	AT3G63000	0.0001907	0.001797	320.646	18.9665	504.706	37.6912
257249_at	expressed protein	AT3G24180	0.0001919	0.001804	129.585	28.5832	237.104	16.9908
256159_at	expressed protein	AT1G30135	0.0001935	0.001817	357.305	57.7327	561.481	65.7832
255600_s_at	helicase domain-containing protein / IBR domain-containing protein / zinc finger protein-related	AT4G01020 : AT5G10370	0.0001948	0.001828	130.09	24.9251	243.85	19.2124
262532_at	expressed protein	AT1G17210	0.0001949	0.001828	125.349	39.9429	248.519	41.0933
248933_at	guanylate-binding family protein	AT5G46070	0.0001975	0.001849	205.771	52.497	350.493	30.1497
245333_at	expressed protein	AT4G14615	0.0001981	0.001853	530.33	25.6305	783.659	95.2966
259414_at	pentatricopeptide (PPR) repeat-containing protein	AT1G02420	0.0002005	0.001874	13.7727	3.95779	25.4434	6.70057
251320_at	ketopantoate hydroxymethyltransferase family protein	AT3G61530	0.0002012	0.001878	129.799	22.8026	237.145	16.8077
249443_at	expressed protein	AT5G39600	0.000203	0.00189	18.308	2.16686	31.1762	1.62386
250094_at	pyruvate decarboxylase family protein	AT5G17380	0.000203	0.00189	2140.34	183.668	3116.04	555.354
263534_at	cytochrome b5 domain-containing protein	AT2G24940 : AT2G24945	0.0002038	0.001895	1115.2	79.2705	1566.07	114.407
253416_at	pyruvate decarboxylase, putative	AT4G33070	0.0002054	0.001906	14.4813	2.43269	25.6425	3.27192
245207_at	zinc finger (C3HC4-type RING finger) family protein	AT5G12310	0.0002059	0.001909	1440.27	150.787	1982.45	71.3526
264262_at	histone H3	AT1G09200	0.0002063	0.001912	20.5922	1.60476	38.7693	6.91088
248901_at	NLI interacting factor (NIF) family protein	AT5G46410	0.000207	0.001916	80.6362	17.2451	149.644	27.0072
249036_at	nuclear cap-binding protein, putative	AT5G44200	0.000208	0.001922	50.0431	17.7394	100.878	5.52376
246074_at	expressed protein	AT5G20130	0.0002089	0.001928	27.8609	5.74498	50.8355	5.34814
247293_at	expressed protein	AT5G64510	0.0002095	0.001931	539.419	50.0205	812.604	84.4474
250781_at	DRE-binding protein (DREB2A)	AT5G05410	0.0002105	0.001936	412.414	115.631	677.942	42.3302
266284_at	pumilio/Puf RNA-binding domain-containing protein	AT2G29190	0.0002105	0.001936	57.1416	23.2761	115.133	14.9255
264922_s_at	U2 snRNP auxiliary factor large subunit, putative	AT1G60830 : AT1G60900	0.0002113	0.001941	622.165	27.2298	934.476	59.4415
246521_at	N2,N2-dimethylguanosine tRNA methyltransferase family protein	AT5G15810	0.0002136	0.001956	41.6719	3.90463	74.5504	0.802514
246493_at	hypothetical protein	AT5G16180	0.000214	0.001959	11.9429	3.66188	22.0108	1.83858
251956_at	29 kDa ribonucleoprotein, chloroplast / RNA-binding protein cp 29	AT3G53460	0.0002144	0.00196	75.2941	18.9249	139.823	16.5288
258822_s_at	transcriptional activator, putative	AT3G07220 : AT3G07260	0.0002147	0.001962	270.438	47.5654	445.713	22.0278
249830_at	dihydroorotate dehydrogenase, mitochondrial / dihydroorotate oxidase / DHOdehase (PYRD)	AT5G23300	0.0002191	0.001998	20.3206	4.47021	37.6339	4.96003
260733_at	RNA recognition motif (RRM)-containing protein	AT1G17640	0.0002191	0.001998	209.128	22.1431	332.968	29.0297
257925_at	expressed protein	AT3G23170	0.0002202	0.002006	186.861	48.726	330.371	57.8785
252383_at	ABC transporter family protein	AT3G47780	0.000224	0.002036	71.9119	20.2033	136.866	18.4421
247847_at	expressed protein	AT5G58110	0.0002242	0.002036	901.689	59.7509	1276.62	55.0814
248883_at	KH domain-containing protein	AT5G46190	0.0002242	0.002036	27.5187	1.29175	48.7415	6.21022
248107_at	Ras-related GTP-binding protein (RAN3)	AT5G55190	0.0002244	0.002036	359.641	18.8636	545.436	17.7984
252246_at	pentatricopeptide (PPR) repeat-containing protein	AT3G49730	0.0002251	0.002039	38.0418	5.4807	69.4911	10.4127
249171_at	zinc finger (C3HC4-type RING finger) family protein	AT5G42940	0.0002253	0.00204	418.623	36.5947	653.745	98.1422
251346_at	pentatricopeptide (PPR) repeat-containing protein	AT3G60980	0.0002266	0.002048	19.1439	1.81815	33.6584	2.16277
257714_at	histone H3	AT3G27360	0.0002281	0.00206	440.806	26.4276	680.303	1.13545
249850_at	DNAJ heat shock N-terminal domain-containing protein	AT5G23240	0.0002284	0.00206	13.6772	2.04784	26.9138	9.79975
258300_at	casein kinase, putative	AT3G23340	0.000229	0.002064	674.346	112.817	1014.68	53.0615
260316_at	nucleolar RNA-associated family protein / Nrap family protein	AT1G63810	0.0002292	0.002065	19.148	4.5539	34.2343	2.58669
254493_at	expressed protein	AT4G20020	0.0002295	0.002066	323.378	35.1221	512.558	13.7433
258901_at	protein phosphatase 2C, putative / PP2C, putative	AT3G05640	0.0002303	0.002071	198.745	32.8029	340.783	50.0009
262094_at	nucleolar protein Nop56, putative	AT1G56110	0.0002307	0.002074	69.8774	24.4881	133.079	3.6044
267015_at	SAC3/GANP family protein	AT2G39340	0.0002315	0.002079	235.909	86.9384	411.892	19.7735
249315_at	expressed protein	AT5G41190	0.0002333	0.002094	63.8583	5.96892	108.175	6.36004
260953_at	bZIP transcription factor, putative (bZIP69)	AT1G06070	0.0002336	0.002095	200.853	36.1625	340.159	23.7543
262953_at	expressed protein	AT1G75670	0.0002341	0.002097	41.2112	5.07056	74.2851	5.2759
257177_at	cyanate lyase family	AT3G23490	0.0002342	0.002097	1463.21	62.7106	1974.71	149.07
258716_at	DNAJ heat shock N-terminal domain-containing protein	AT3G09690 : AT3G09700	0.0002361	0.002112	33.8923	0.425034	64.082	11.0737
262803_at	zinc-binding family protein	AT1G21000	0.0002393	0.002136	2916.11	276.577	3919.41	201.279
262880_at	ribosomal protein S5 family protein	AT1G64880	0.0002393	0.002136	38.9705	12.4719	72.1654	7.30053
253996_at	nucleosome assembly protein (NAP), putative	AT4G26110	0.0002399	0.002139	88.8917	12.8721	158.512	20.213
256055_at	mitochondrial substrate carrier family protein	AT1G07030	0.00024	0.002139	60.0679	4.8799	102.451	1.79188
264254_at	pseudouridine synthase and archaeosine transglycosylase (PUA) domain-containing protein	AT1G09150	0.0002402	0.002139	82.6877	8.04402	159.963	48.3111
254079_at	FtsJ-like methyltransferase family protein	AT4G25730	0.0002406	0.002141	57.6593	17.6805	108.205	12.7099
249343_at	succinate dehydrogenase, iron-sulphur subunit, mitochondrial (SDH2-2)	AT5G40650	0.0002419	0.002152	371.318	0.211859	567.408	33.1275
250384_at	expressed protein	AT5G11500	0.0002455	0.002179	1020.08	99.99	1437.57	98.3007
260455_at	inter-alpha-trypsin inhibitor heavy chain-related	AT1G72500	0.0002458	0.002179	7.67974	0.715895	11.9481	1.62954
251946_at	expressed protein	AT3G53540	0.0002459	0.002179	19.4672	1.55715	35.6685	8.33742
253803_at	expressed protein	AT4G28200	0.0002462	0.00218	119.284	10.1277	212.518	17.896
257020_at	WD-40 repeat family protein / mitotic checkpoint protein, putative	AT3G19590	0.0002478	0.002191	26.426	1.40084	46.3613	5.54998
246732_at	PWWP domain-containing protein	AT5G27650	0.0002498	0.002204	17.708	3.38038	32.9191	4.88319
250001_at	F-box family protein / tubby family protein	AT5G18680	0.0002507	0.00221	134.493	32.1235	243.54	6.46244
258085_at	regulator of chromosome condensation (RCC1) family protein	AT3G26100	0.0002534	0.002233	1059.94	157.291	1528.35	104.341
257193_at	pentatricopeptide (PPR) repeat-containing protein	AT3G13160	0.0002538	0.002234	82.9148	10.2883	156.723	33.1531
259928_at	5'-3' exonuclease family protein	AT1G34380	0.0002543	0.002236	10.5292	1.56722	16.7193	1.99587
257009_at	oxidoreductase, 2OG-Fe(II) oxygenase family protein	AT3G14160	0.0002546	0.002238	19.2541	4.36469	34.5507	4.18726
258404_at	ribosomal protein L3 family protein	AT3G17465	0.0002558	0.002246	11.0251	1.14705	17.9735	2.10948
250272_at	glycosyl transferase family 48 protein	AT5G13000	0.0002579	0.002262	303.324	56.3552	491.896	56.5395
249377_at	expressed protein	AT5G40690	0.000258	0.002262	2076.13	92.0422	2872.82	368.6
245236_at	DNA mismatch repair protein MSH3 (MSH3)	AT4G25540	0.0002586	0.002266	20.3513	3.50694	36.6634	6.21971
262746_at	MutT/nudix family protein	AT1G28960	0.000259	0.002266	184.504	36.0425	311.763	27.7367
263963_at	DNA-binding protein, putative	AT2G36080	0.0002607	0.00228	15.5014	0.984605	27.7582	3.82238
261418_at	ribosomal protein L29 family protein	AT1G07830	0.0002619	0.002288	209.863	54.052	356.466	26.1923
265011_at	60 kDa inner membrane family protein	AT1G24490	0.000262	0.002288	82.6711	10.7927	142.13	19.561
262580_at	CBS domain-containing protein	AT1G15330	0.0002638	0.002299	1339.03	204.979	1900.47	150.86
263344_at	scramblase-related	AT2G04940	0.0002638	0.002299	42.0228	7.53592	75.3572	5.03796
256341_at	deoxynucleoside kinase family	AT1G72040	0.0002664	0.002318	524.852	32.3632	782.873	48.3689
259354_at	heavy-metal-associated domain-containing protein	AT3G05220	0.0002669	0.00232	691.558	231.11	1103.78	47.9038
249344_at	prohibitin	AT5G40770	0.0002677	0.002323	719.836	20.5368	1035.1	51.6332
258141_at	histone H1/H5 family protein	AT3G18035	0.0002712	0.00235	668.791	123.777	1011.69	39.613
263385_at	Em-like protein GEA6 (EM6)	AT2G40170	0.0002713	0.00235	18493.3	1233.29	22979	2376.27
263920_at	expressed protein	AT2G36410	0.0002718	0.002352	114.956	5.74604	196.841	31.9747
251943_at	zinc knuckle (CCHC-type) family protein	AT3G53500	0.0002761	0.002383	639.377	138.687	995.049	21.1193
260981_at	expressed protein	AT1G53460	0.0002767	0.002383	63.0522	6.91278	106.466	8.38521
262068_at	splicing factor, putative	AT1G80070	0.0002773	0.002386	943.033	194.226	1430.54	205.566
253702_at	calcium-transporting ATPase, plasma membrane-type, putative / Ca2+-ATPase, putative (ACA10)	AT4G29900	0.0002775	0.002386	62.6911	29.5721	134.056	28.5714
260786_s_at	elongation factor Tu family protein	AT1G06220 : AT5G25230	0.0002779	0.002388	331.525	23.5946	546.427	42.4181
267396_at	expressed protein	AT2G44270	0.0002807	0.002411	80.8724	15.4141	138.257	9.15321
258714_at	zinc finger (C3HC4-type RING finger) family protein	AT3G09770	0.0002825	0.002425	413.876	37.8407	621.634	59.6539
264957_at	F-box family protein	AT1G77000	0.0002843	0.002437	1855.44	190.539	2634.59	230.694
260331_at	DNA-binding protein, putative	AT1G80270	0.0002861	0.002449	40.539	11.1058	75.1884	9.4027
250911_at	serine/threonine protein kinase (CTR1)	AT5G03730	0.0002895	0.002474	319.198	55.5691	501.675	48.2135
246527_at	RNA-binding S4 domain-containing protein	AT5G15750	0.0002911	0.002478	355.323	25.8585	522.039	24.2187
253497_at	expressed protein	AT4G31880	0.0002917	0.002481	190.464	19.5719	296.512	9.82951
263961_at	F-box family protein (FBL11)	AT2G36370	0.0002918	0.002481	18.8796	1.31368	34.0958	6.36289
248210_at	oxidoreductase, 2OG-Fe(II) oxygenase family protein	AT5G54000	0.0002928	0.002486	388.341	118.41	635.274	50.5711
253324_at	zinc finger (C3HC4-type RING finger) family protein	AT4G33940	0.0002943	0.002494	585.861	56.8671	838.166	46.6864
266480_at	expressed protein	AT2G31130	0.0002989	0.002528	500.062	93.8835	801.616	109.578
250148_at	transducin family protein / WD-40 repeat family protein	AT5G14530	0.0003005	0.002538	70.5965	8.59537	127.669	17.9116
251413_at	expressed protein	AT3G60320	0.0003006	0.002538	60.4175	6.47016	103.939	3.62971
257250_at	myb family transcription factor	AT3G24120	0.0003008	0.002538	106.689	12.0467	174.136	9.26363
255871_at	small nuclear ribonucleoprotein U2B, putative / spliceosomal protein, putative	AT2G30260	0.0003018	0.002545	46.2382	10.3712	89.9949	15.7071
252562_s_at	histone H4	AT3G45930 : AT3G46320	0.0003033	0.002551	26.0907	4.16594	44.4652	4.19666
255226_at	UV-damaged DNA-binding protein, putative	AT4G05420	0.0003043	0.002558	317.103	49.7335	499.544	45.4342
251260_at	epimerase-related	AT3G62130	0.0003047	0.002558	93.3267	14.2897	168.706	33.2244
257516_at	ACT domain containing protein (ACR4)	AT1G69040	0.0003047	0.002558	25.5838	2.14311	45.6114	8.64897
246800_at	glycine hydroxymethyltransferase, putative / serine hydroxymethyltransferase, putative / serine/threonine aldolase, putative	AT5G26780	0.0003054	0.00256	142.542	15.6745	263.523	53.3383
266965_at	nodulin MtN21 family protein	AT2G39510	0.0003055	0.00256	32.2321	22.3341	72.3101	12.3815
253097_at	cytochrome P450 family protein	AT4G37320	0.0003058	0.00256	9.6038	0.895091	15.5974	1.84877
262246_at	argonaute protein (AGO1)	AT1G48410	0.0003062	0.002562	650.843	85.5116	992.527	117.815
255418_at	expressed protein	AT4G03200	0.0003085	0.002579	1841.94	93.2045	2579.2	202.541
248957_at	26S proteasome regulatory subunit, putative (RPN9)	AT5G45620	0.0003087	0.002579	525.232	40.8214	784.022	57.3252
252962_at	splicing factor, putative	AT4G38780	0.0003126	0.002606	10.5035	1.03311	16.9729	3.23558
250935_at	polyubiquitin (UBQ4)	AT5G03240	0.0003161	0.002628	904.508	66.3925	1293.39	150.792
246865_s_at	eukaryotic translation initiation factor 3 subunit 9 / eIF-3 eta / eIF3b (TIF3B1)	AT5G25780 : AT5G27640	0.0003174	0.002636	431.706	50.195	661.862	49.4869
258505_at	BAP28-related	AT3G06530	0.0003183	0.00264	44.8714	5.78408	94.4478	35.2628
252326_at	expressed protein	AT3G48680 : AT3G48690	0.0003192	0.002644	263.992	45.7626	413.561	27.0403
250197_at	isocitrate dehydrogenase, putative / NADP+ isocitrate dehydrogenase, putative	AT5G14590	0.0003219	0.002664	227.789	20.6714	366.323	19.5632
262512_at	expressed protein	AT1G17145	0.0003224	0.002665	582.232	81.6728	845.392	48.9889
264674_at	DNA polymerase delta subunit 4 family	AT1G09815	0.000323	0.002669	808.66	48.7165	1161.25	25.9201
247274_at	DNAJ heat shock N-terminal domain-containing protein	AT5G64360	0.0003247	0.00268	13.5351	3.5374	22.8491	1.89051
249133_at	transcription initiation factor IID (TFIID) component TAF4 family protein	AT5G43130	0.0003249	0.00268	441.11	35.7428	680.66	55.5908
251657_at	nucleolar essential protein-related	AT3G57000	0.0003284	0.002708	258.557	18.9178	401.642	30.4601
262130_at	AAA-type ATPase family protein	AT1G02890	0.000331	0.002719	877.11	73.2454	1227.33	81.8805
246317_at	aladin-related / adracalin-related	AT3G56900	0.0003324	0.002728	11.9492	0.964353	21.6432	6.75104
258847_at	NADH:ubiquinone oxidoreductase family protein	AT3G03100	0.0003333	0.002734	1960.61	144.633	2681.11	192.219
266589_at	myosin heavy chain-related	AT2G46250	0.0003336	0.002735	19.2579	5.70689	34.2483	1.46827
259432_at	myb family transcription factor	AT1G01520	0.0003342	0.002737	12.1583	2.28665	21.5645	5.71238
249845_at	expressed protein	AT5G23610	0.0003343	0.002737	561.541	66.2219	841.34	75.8602
250227_at	FtsJ-like methyltransferase family protein	AT5G13830	0.000338	0.002765	7.59998	0.979958	11.4637	0.340063
253274_at	D-3-phosphoglycerate dehydrogenase, putative / 3-PGDH, putative	AT4G34200	0.0003412	0.002784	180.596	82.8526	345.652	35.0389
248694_at	expressed protein	AT5G48340	0.0003423	0.002791	19.9053	4.26792	36.2483	5.71419
247449_at	nucleotide-sensitive chloride conductance regulator (ICln) family protein	AT5G62290	0.0003438	0.002797	43.7539	6.19872	76.0227	3.67279
267498_at	armadillo/beta-catenin repeat family protein	AT2G45720	0.0003447	0.0028	112.72	12.7197	187.699	13.2752
257937_at	expressed protein	AT3G19810	0.0003451	0.0028	73.6835	9.72679	128.168	7.93167
258202_at	expressed protein	AT3G13940	0.0003469	0.002812	145.249	19.3784	246.224	21.2988
266005_at	splicing factor RSZ33 (RSZ33)	AT2G37340	0.0003472	0.002813	1130.75	65.9735	1544.71	62.9421
265087_at	prefoldin subunit family protein	AT1G03760	0.0003491	0.002823	191.655	18.4506	304.163	4.5937
250538_at	DEAD box RNA helicase (RH25)	AT5G08620	0.0003493	0.002823	24.9674	1.76093	42.8537	4.57268
258862_at	mitochondrial processing peptidase beta subunit, putative	AT3G02090	0.0003493	0.002823	1308.43	107.258	1767.56	43.9475
258396_at	brix domain-containing protein	AT3G15460	0.0003516	0.002838	119.672	20.4621	214.117	26.355
254831_at	ribosomal protein L7Ae/L30e/S12e/Gadd45 family protein	AT4G12600	0.0003525	0.002841	252.262	16.2148	402.049	56.5258
253712_at	Der1-like family protein / degradation in the ER-like family protein	AT4G29330	0.0003536	0.002848	232.846	25.0792	374.35	21.9247
256284_at	DNA replication protein-related	AT3G12530	0.0003587	0.002884	14.6044	2.59164	26.0612	4.23311
246173_s_at	pentatricopeptide (PPR) repeat-containing protein	AT3G61520 : AT5G28370 : AT5G28460	0.0003621	0.002907	96.1729	21.459	160.411	7.67781
258193_at	pectinesterase family protein	AT3G29090	0.0003624	0.002907	258.282	28.6517	410.387	51.1735
263466_at	expressed protein	AT2G31740	0.0003629	0.00291	28.8392	4.19762	53.977	10.6408
265092_at	expressed protein	AT1G03910	0.0003647	0.002921	899.495	92.7214	1267.32	50.1615
253299_at	expressed protein	AT4G33800	0.0003651	0.002922	10.6504	1.36958	16.5717	1.64468
261876_at	pirin, putative	AT1G50590	0.0003719	0.002969	498.679	92.1022	765.643	37.3684
260616_at	DJ-1 family protein	AT1G53280	0.0003749	0.002987	94.7221	2.64844	154.351	8.78846
247002_at	WD-40 repeat family protein	AT5G67320	0.0003799	0.003023	115.222	31.6827	203.467	33.1922
263545_at	expressed protein	AT2G21560	0.000382	0.003034	239.572	60.8549	406.832	60.5482
250252_at	transporter-related	AT5G13750	0.0003841	0.003045	846.039	19.0256	1246.31	213.619
258104_at	brix domain-containing protein	AT3G23620	0.0003844	0.003045	136.837	17.7126	223.137	20.3539
247296_at	expressed protein	AT5G64160	0.0003873	0.003066	442.434	32.2024	678.055	39.6269
266351_at	phytanoyl-CoA dioxygenase (PhyH) family protein	AT2G01490	0.0003882	0.003068	1031.1	76.7671	1434.08	56.5164
260008_at	zinc finger (C3HC4-type RING finger) family protein	AT1G68070	0.0003905	0.003083	349.554	15.8849	505.787	7.25199
250713_at	chaperone protein dnaJ-related	AT5G06130	0.0003907	0.003083	401.541	28.2191	585.068	11.4281
251187_at	transport protein-related	AT3G62770	0.0003929	0.003099	677.185	79.8462	1008.16	111.104
266482_at	small nuclear ribonucleoprotein D2, putative / snRNP core protein D2, putative / Sm protein D2, putative	AT2G47640	0.0003933	0.0031	446.995	47.8199	669.951	55.1592
249325_at	urophorphyrin III methylase (UPM1)	AT5G40850	0.0003935	0.0031	49.8983	3.23028	94.1975	25.3424
257125_at	T-complex protein 1 alpha subunit / TCP-1-alpha / chaperonin (CCT1)	AT3G20050	0.0003972	0.003127	191.639	18.4061	310.186	45.1472
250701_at	bZIP family transcription factor	AT5G06839	0.0003976	0.003128	11.1208	1.88248	18.2138	2.31289
254732_at	expressed protein	AT4G13750	0.0003991	0.003138	12.9757	1.00426	21.162	2.42178
263716_at	26S proteasome regulatory subunit S2 (RPN1)	AT2G20580	0.0004013	0.003152	609.226	83.347	882.069	74.7013
251429_at	dynamin-like protein E (DL1E)	AT3G60190	0.000403	0.003163	415.961	31.3211	610.801	11.8132
259117_at	paired amphipathic helix repeat-containing protein	AT3G01320	0.0004032	0.003163	154.422	12.832	252.769	15.1568
262341_at	ubiquitin-conjugating enzyme, putative	AT1G64230	0.0004055	0.003175	1418.67	142.278	1935.22	76.3517
253225_at	Rac-like GTP-binding protein (ARAC3) / Rho-like GTP-binding protein (ROP6)	AT4G35020	0.0004065	0.00318	17.6231	3.07329	29.811	1.71375
250191_at	DNA-binding bromodomain-containing protein	AT5G14270	0.0004073	0.003185	193.403	42.1114	310.041	22.3557
258627_at	Pex2/Pex12 N-terminal domain-containing protein	AT3G04460	0.0004119	0.003217	21.0202	0.46428	36.7478	2.60239
261435_at	GTP1/OBG family protein	AT1G07620	0.0004126	0.00322	9.29418	1.28822	14.4242	1.68074
253279_at	methylcrotonyl-CoA carboxylase beta chain, mitochondrial / 3-methylcrotonyl-CoA carboxylase 2 (MCCB)	AT4G34030	0.0004132	0.00322	26.3234	7.35682	46.6336	5.66332
255482_at	chloroplast outer membrane protein, putative	AT4G02510	0.0004132	0.00322	475.223	46.0523	705.957	37.8403
267312_at	RNA polymerase I specific transcription initiation factor RRN3 family protein	AT2G34750	0.0004134	0.00322	54.7906	25.1217	110.808	6.94619
256724_at	apoptosis inhibitory 5 (API5) family protein	AT2G34040	0.0004147	0.003229	74.1369	6.94856	126.424	6.56991
257684_s_at	transducin family protein / WD-40 repeat family protein	AT3G13290 : AT3G13300	0.0004162	0.003238	1056.13	184.717	1555.32	242.984
249873_at	ATP-dependent Clp protease proteolytic subunit, putative	AT5G23140	0.0004186	0.003255	181.99	18.7609	290.911	15.0032
249690_at	expressed protein	AT5G36210	0.0004198	0.003259	47.0393	5.60328	82.7406	6.09201
246028_at	5'-AMP-activated protein kinase beta-2 subunit, putative	AT5G21170	0.0004228	0.003279	261.468	51.9007	411.587	7.69364
257786_at	expressed protein	AT3G26990	0.0004244	0.00329	40.1635	10.1223	71.5405	5.81262
253549_at	50S ribosomal protein L21, mitochondrial (RPL21M)	AT4G30930	0.0004267	0.003304	17.5705	2.33056	30.5657	2.79491
257685_at	pentatricopeptide (PPR) repeat-containing protein	AT3G12770	0.0004276	0.003309	7.44098	0.741806	11.0531	0.745623
258009_at	pseudouridine synthase family protein	AT3G19440	0.0004299	0.00332	17.2373	4.36757	29.1986	3.8743
264257_at	RNA recognition motif (RRM)-containing protein	AT1G09230	0.0004304	0.003322	34.7968	8.82337	67.3416	12.9441
258575_at	O-linked N-acetyl glucosamine transferase, putative	AT3G04240	0.0004331	0.003339	284.07	59.308	456.128	72.3052
266364_at	expressed protein	AT2G41230	0.000439	0.003376	2502.76	152.478	3470.82	304.849
254236_at	leucine-rich repeat family protein	AT4G23840	0.0004424	0.003395	73.3662	11.4488	125.018	14.1065
249984_at	expressed protein	AT5G18400	0.0004446	0.003408	318.904	54.9054	486.978	9.93502
266288_s_at	pumilio/Puf RNA-binding domain-containing protein	AT2G29140 : AT2G29200	0.0004461	0.003418	509.565	104.651	801.11	55.9173
261863_at	expressed protein	AT1G50630	0.0004487	0.003435	25.2328	7.18558	44.3201	2.4658
250273_at	RNA helicase, putative	AT5G13010	0.0004535	0.003468	255.753	66.722	423.413	43.9091
246464_at	NADP-dependent oxidoreductase, putative	AT5G16980	0.0004558	0.003483	51.4872	23.7305	110.285	36.7618
254915_s_at	cysteine proteinase, putative	AT4G11310 : AT4G11320	0.0004563	0.003483	9105.75	977.264	11326.2	234.023
266847_at	transducin family protein / WD-40 repeat family protein	AT2G26060	0.00046	0.003509	462.877	56.2239	683.347	34.1932
263412_at	histone H2B, putative	AT2G28720	0.0004635	0.003531	1139.38	67.4224	1543.66	41.1925
252276_at	expressed protein	AT3G49490	0.0004759	0.003612	463.908	46.8164	699.567	93.9099
248328_at	myb family transcription factor	AT5G52660	0.0004761	0.003612	230.103	51.4423	369.265	17.729
245278_at	syntaxin 23 (SYP23) / PEP12-like protein	AT4G17730	0.000479	0.00363	284.046	41.7648	428.523	32.112
260679_at	SIT4 phosphatase-associated family protein	AT1G07990	0.0004796	0.003633	27.2525	7.97755	49.7223	5.66975
260446_at	chaperone-related	AT1G72420	0.00048	0.003633	34.491	6.23124	62.7607	6.26282
250703_at	ribosomal protein S8e family protein	AT5G06360	0.0004804	0.003634	1224.24	108.654	1658.98	25.2531
259543_at	small nuclear ribonucleoprotein, putative / snRNP, putative / Sm protein, putative	AT1G20580	0.0004827	0.003645	235.004	35.3792	374.428	21.995
261107_at	SPX (SYG1/Pho81/XPR1) domain-containing protein	AT1G63010	0.0004831	0.003646	1339.25	256.674	1922.06	271.688
247841_at	fip1 motif-containing protein	AT5G58040	0.0004839	0.003649	101.813	29.6113	187.48	32.462
254073_at	arginine/serine-rich splicing factor RSP40 (RSP40)	AT4G25500	0.0004843	0.00365	140.582	22.1937	233.581	11.2007
262005_at	ABC transporter family protein	AT1G64550	0.0004867	0.003664	40.8901	7.25701	72.1018	1.81735
256235_at	cysteine protease inhibitor, putative / cystatin, putative	AT3G12490	0.0004908	0.003693	6110.61	360.075	7951.33	608.858
261486_at	PHD finger family protein	AT1G14510	0.0004931	0.003708	699.61	40.726	1015.16	31.2045
251465_at	nucleotide-sugar transporter family protein	AT3G59360	0.0004935	0.003708	111.323	15.0283	178.805	11.3262
248594_at	expressed protein	AT5G49210	0.0004976	0.003733	50.2919	9.48434	99.1203	26.7505
265383_at	WD-40 repeat protein (MSI2)	AT2G16780	0.0004994	0.003737	15.7264	3.62988	27.3951	0.653685
254162_at	transcription initiation factor IIA gamma chain / TFIIA-gamma (TFIIA-S)	AT4G24440	0.0005053	0.003775	421.217	23.6069	642.589	83.5648
254483_at	pentatricopeptide (PPR) repeat-containing protein	AT4G20740	0.0005084	0.003791	22.7277	2.70596	41.2515	7.3974
256271_at	emsy N terminus domain-containing protein / ENT domain-containing protein	AT3G12140	0.0005124	0.003815	168.604	31.6923	282.049	20.4924
261347_at	hydroxyproline-rich glycoprotein family protein	AT1G79730	0.0005125	0.003815	117.212	38.7635	201.77	9.50828
265991_at	DNA-directed RNA polymerase, chloroplast (RPOPT)	AT2G24120	0.0005129	0.003816	7.95118	1.1818	12.1466	1.57519
254871_at	WD-40 repeat family protein	AT4G11920	0.0005174	0.003838	32.0921	9.91395	61.1615	7.33095
258019_at	F-box family protein	AT3G19470	0.0005174	0.003838	15.4535	1.89435	27.2328	5.50735
252013_at	expressed protein	AT3G52860	0.0005203	0.003857	33.9945	2.32807	59.7675	2.43504
247543_at	ethylene-responsive element-binding family protein	AT5G61600	0.0005207	0.003858	26.1211	2.87785	45.2185	9.97853
265945_at	FAD-binding domain-containing protein / cytokinin oxidase family protein	AT2G19500	0.0005217	0.003863	31.2013	7.32015	60.4906	17.4024
254763_at	60S ribosomal protein L13A (RPL13aC)	AT4G13170	0.0005241	0.003874	42.2922	7.18664	71.1687	3.13281
247791_at	peptidyl-prolyl cis-trans isomerase, putative / cyclophilin, putative / rotamase, putative (ROC7)	AT5G58710	0.0005352	0.003943	2459.89	194.499	3368.11	96.1556
257240_at	monooxygenase family protein	AT3G24200	0.0005355	0.003943	506.115	48.2385	763.388	16.9177
256440_at	haloacid dehalogenase-like hydrolase family protein	AT3G10970	0.0005357	0.003943	635.69	36.3306	953.264	130.673
251804_at	glycosyl hydrolase family 17 protein / beta-1,3-glucanase, putative	AT3G55430	0.0005377	0.003953	1685.42	95.0843	2350.55	320.801
261743_s_at	kelch repeat-containing serine/threonine phosphoesterase family protein	AT1G08420 : AT2G27210	0.000541	0.003973	214.881	35.8237	337.396	25.5703
248549_at	kelch repeat-containing protein	AT5G50310	0.0005539	0.004051	120.968	52.5702	218.344	28.5845
263707_at	metallopeptidase M24 family protein	AT1G09300	0.0005575	0.004071	7.63702	0.521041	11.2358	0.182277
267102_at	WD-40 repeat family protein / small nuclear ribonucleoprotein Prp4p-related	AT2G41500	0.0005611	0.004092	32.0108	3.43306	55.6766	6.69787
247926_at	expressed protein	AT5G57280	0.0005719	0.004161	32.6556	12.2924	59.5526	3.08585
257724_at	expressed protein	AT3G18510	0.000572	0.004161	33.8771	4.45694	60.8293	10.5122
255495_at	expressed protein	AT4G02720	0.0005799	0.004205	346.219	67.4274	538.98	34.6892
250249_at	expressed protein	AT5G13760	0.0005807	0.004208	110.259	26.7888	178.688	3.38396
264585_at	auxin-resistance protein AXR1 (AXR1)	AT1G05180	0.0005818	0.004214	83.2362	15.9744	137.735	6.31357
255021_at	glycine-rich protein	AT4G10330	0.000588	0.004249	202.972	34.319	332.846	59.1576
260641_at	expressed protein	AT1G53200	0.0005895	0.004257	27.1024	3.69801	44.9115	1.97231
267628_at	basic helix-loop-helix (bHLH) family protein	AT2G42280	0.0005952	0.004286	190.294	35.8767	293.679	5.27115
252331_s_at	serine C-palmitoyltransferase, putative	AT3G48780 : AT3G48790	0.000596	0.004289	670.996	10.7641	916.087	14.2559
259681_at	nitrate reductase 1 (NR1)	AT1G77760	0.0005967	0.00429	246.27	68.5244	439.41	124.905
257487_at	expressed protein	AT1G71850	0.0005985	0.004299	14.4618	2.67509	24.1165	1.31966
255147_at	expressed protein	AT4G08460	0.0006009	0.004312	54.6229	15.4444	101.147	13.454
248927_at	autophagy 7 (APG7)	AT5G45900	0.0006021	0.004318	1201.44	204.479	1736.38	263.946
256792_at	pentatricopeptide (PPR) repeat-containing protein	AT3G22150	0.0006049	0.004333	11.8063	2.20092	19.2603	1.41027
254177_at	PHD finger protein-related	AT4G23860	0.0006055	0.004333	32.4239	4.51556	56.4806	7.5127
256965_at	2-oxoisovalerate dehydrogenase / 3-methyl-2-oxobutanoate dehydrogenase / branched-chain alpha-keto acid dehydrogenase E1 beta subunit (DIN4)	AT3G13450	0.000607	0.004339	21.1381	6.21195	39.863	9.22603
249975_s_at	ribosomal protein L33 family protein	AT3G06320 : AT5G18790	0.0006086	0.004347	225.748	65.9292	379.609	61.5212
265310_at	zinc finger (CCCH-type) family protein	AT2G20280	0.0006089	0.004347	261.699	79.3225	425.894	13.7826
255225_at	transducin family protein / WD-40 repeat family protein	AT4G05410	0.0006113	0.004361	19.5836	2.35149	32.9672	2.32312
250309_at	las1-like family protein	AT5G12220	0.000612	0.004361	15.3238	3.0594	26.1941	3.22515
260598_at	CBS domain-containing protein / transporter associated domain-containing protein	AT1G55930	0.0006121	0.004361	15.4482	3.20889	26.3148	2.57974
254188_at	UDP-glucose 4-epimerase, putative / UDP-galactose 4-epimerase, putative / Galactowaldenase, putative	AT4G23920	0.0006134	0.004364	13.0332	1.8783	20.9491	1.82336
259913_at	developmentally regulated GTP-binding protein, putative	AT1G72660	0.0006166	0.004384	8.88583	0.162131	13.4612	0.537567
249027_at	copper-exporting ATPase / responsive-to-antagonist 1 / copper-transporting ATPase (RAN1)	AT5G44790	0.000619	0.0044	787.962	129.361	1117.18	30.9473
251206_at	expressed protein	AT3G63090	0.0006291	0.004461	18.1	2.6147	31.1172	5.93604
253331_at	nucellin protein, putative	AT4G33490	0.0006378	0.004517	15.004	1.95002	25.3812	2.6864
263255_at	expressed protein	AT1G10490	0.0006409	0.004534	8.08078	0.653258	11.7923	0.694146
245913_at	expressed protein	AT5G19860	0.0006433	0.004548	838.117	34.1835	1174.07	129.926
261406_at	nucleosome assembly protein (NAP) family protein	AT1G18800	0.0006487	0.004577	404.076	67.0819	596.284	8.76748
265594_at	ribosomal protein L4 family protein	AT2G20060	0.0006488	0.004577	383.122	42.3684	579.548	25.8794
255589_s_at	expressed protein	AT4G01590 : AT4G35680	0.0006508	0.004586	11.954	0.257635	19.6021	4.40502
258366_at	AP2 domain-containing protein RAP2.2 (RAP2.2)	AT3G14230	0.0006522	0.004593	300.462	29.6943	454.004	26.7546
260307_at	cyclin-related	AT1G70620	0.0006527	0.004594	51.384	11.1221	93.0322	17.9093
256661_at	S1 RNA-binding domain-containing protein	AT3G11964	0.0006551	0.004606	20.9202	4.92954	37.1446	2.28013
251873_at	zinc finger protein-related / D111/G-patch domain-containing protein / RNA recognition motif (RRM)-containing protein	AT3G54230	0.0006557	0.004608	61.7263	6.02942	102.048	11.0083
261566_at	expressed protein	AT1G33230	0.0006567	0.004612	477.544	75.0757	703.503	24.196
260904_at	NPR1/NIM1-interacting protein 1 (NIMIN-1)	AT1G02450	0.0006653	0.004661	5.5763	1.03241	8.0719	1.28675
259511_at	superoxide dismutase copper chaperone, putative	AT1G12520	0.0006655	0.004661	157.328	18.2718	263.661	23.7224
259515_at	expressed protein	AT1G20430	0.0006661	0.004663	7.71025	0.964778	11.8728	2.04973
247096_at	S-adenosyl-L-methionine:carboxyl methyltransferase family protein	AT5G66430	0.0006683	0.004676	1330.01	264.026	1823.31	11.749
253759_at	abnormal inflorescence meristem 1 / fatty acid multifunctional protein (AIM1)	AT4G29010	0.0006713	0.004694	1811.87	68.7467	2446.92	77.5205
257122_at	pumilio/Puf RNA-binding domain-containing protein	AT3G20250	0.0006723	0.004698	1850.68	402.673	2638.84	111.387
245879_at	chloroplast outer membrane translocon subunit, putative	AT5G09420	0.0006733	0.0047	29.0681	4.64757	50.0297	3.32721
249136_at	expressed protein	AT5G43180	0.0006736	0.0047	332.429	42.036	542.5	96.7704
251245_at	basic helix-loop-helix (bHLH) protein, putative	AT3G62090	0.0006744	0.004701	495.456	152.704	774.653	27.1485
265521_at	expressed protein	AT2G06010	0.0006746	0.004701	516.002	74.4185	769.021	37.8776
256982_at	expressed protein	AT3G13460	0.0006753	0.004702	867.35	84.5325	1241.25	207.019
254966_at	WD-40 repeat family protein / phytochrome A-related	AT4G11110	0.0006755	0.004702	408.652	108.083	643.848	43.5592
248138_at	pyruvate decarboxylase, putative	AT5G54960	0.0006764	0.004706	3170.04	261.512	4092.15	173.449
261821_at	thioredoxin family protein	AT1G11530	0.0006805	0.004732	277.158	13.7281	415.842	49.2275
245408_at	glycosyl hydrolase family 17 protein	AT4G17180	0.0006853	0.00476	62.9593	7.72321	107.238	22.6986
252990_at	expressed protein	AT4G38440	0.000687	0.004769	24.2143	9.90499	54.8235	26.5725
249330_at	expressed protein	AT5G40970	0.0006876	0.004771	196.599	16.8249	307.9	10.6449
260500_at	camphor resistance CrcB family protein	AT2G41705	0.0006883	0.004771	30.0989	1.60393	53.4611	6.42614
253953_at	hydroxyproline-rich glycoprotein family protein	AT4G26750	0.0006885	0.004771	70.8555	10.3748	119.51	10.398
245897_at	potassium transporter family protein	AT5G09400	0.0006909	0.004783	8.17838	2.14308	12.6423	1.8789
245350_at	nuclear RNA-binding protein (RGGA)	AT4G16830	0.0006943	0.004804	333.103	38.3263	520.297	22.6913
264805_at	SNF2 domain-containing protein / helicase domain-containing protein	AT1G08600	0.0006966	0.004817	116.943	7.28174	186.799	15.3967
259100_at	DNA-damage-repair/toleration protein (DRT102)	AT3G04870 : AT3G04880	0.0006975	0.004821	132.44	16.3481	219.142	8.35652
267338_at	eukaryotic translation initiation factor 3 subunit 5 / eIF-3 epsilon / eIF3f (TIF3F1)	AT2G39990	0.0006994	0.004832	654.565	18.539	902.413	24.8533
246350_at	expressed protein	AT1G16650	0.0007005	0.004836	60.3462	17.256	103.143	8.40584
260693_at	proton-dependent oligopeptide transport (POT) family protein	AT1G32450	0.0007097	0.004889	161.361	30.319	323.665	117.568
261882_at	expressed protein	AT1G80770	0.0007105	0.004892	7.35682	0.446793	11.0905	1.92742
256002_at	carbamoyl-phosphate synthase family protein	AT1G29900	0.0007132	0.004908	63.2902	19.5464	110.663	14.3927
259282_at	phospholipid/glycerol acyltransferase family protein	AT3G11430	0.0007153	0.00492	17.978	1.74977	35.9785	15.0785
255441_at	cullin family protein	AT4G02570	0.0007176	0.00493	1369.27	173.724	1867.06	157.176
248757_at	expressed protein	AT5G47680	0.0007204	0.004944	145.608	40.8239	253.335	19.6137
261062_at	scarecrow-like transcription factor 14 (SCL14)	AT1G07530	0.0007266	0.004978	438.225	66.5623	651.941	36.9316
250997_at	histone H2B, putative	AT5G02570	0.000731	0.005003	29.2491	5.50194	56.3307	19.2588
265076_at	RuBisCO subunit binding-protein beta subunit, chloroplast / 60 kDa chaperonin beta subunit / CPN-60 beta	AT1G55490	0.000734	0.005021	28.243	6.6288	48.8676	2.25475
248801_at	homeobox-leucine zipper protein 2 (HAT2) / HD-ZIP protein 2	AT5G47370	0.0007382	0.005046	32.7623	10.1288	58.3699	9.21304
259804_at	SEC14 cytosolic factor family protein / phosphoglyceride transfer family protein	AT1G72160	0.0007401	0.005052	177.085	14.3778	273.457	12.8179
245164_at	chaperonin, putative	AT2G33210	0.0007403	0.005052	64.7269	14.1577	106.29	10.5201
253322_at	expressed protein	AT4G33980	0.0007414	0.005057	458.651	80.0561	672.933	25.591
264956_at	ACT domain containing protein	AT1G76990	0.0007437	0.005068	1200.59	195.946	1702.21	209.13
245304_at	integral membrane family protein	AT4G15630	0.0007446	0.005071	1148.8	152.479	1559.87	53.0458
247199_at	bZIP family transcription factor (TGA1)	AT5G65210	0.0007488	0.005093	660.409	3.84673	906.841	25.3413
255261_s_at	equilibrative nucleoside transporter, putative (ENT6)	AT4G05110 : AT4G05120	0.0007495	0.005093	73.0987	6.15905	121.299	17.7211
263654_at	meprin and TRAF homology domain-containing protein / MATH domain-containing protein	AT1G04300	0.000759	0.005148	445.357	89.7198	697.565	97.4902
251924_at	histone H4	AT3G53730	0.0007595	0.005148	685.921	120.87	1015.44	69.8781
251957_at	zinc finger (C3HC4-type RING finger) family protein	AT3G53690	0.0007597	0.005148	8.58414	0.410374	12.8697	2.29399
246083_at	PHD finger family protein	AT5G20510	0.0007613	0.005156	131.792	24.4469	225.682	17.0475
266693_at	expressed protein	AT2G19800	0.0007633	0.005167	17.3395	3.93489	35.4958	16.2865
252137_at	dehydrin, putative	AT3G50980	0.0007638	0.005168	6981.74	353.776	8649.41	248.929
265036_at	hydroxyproline-rich glycoprotein family protein	AT1G04080	0.0007641	0.005168	435.767	55.6135	634.432	42.1508
246897_at	zinc finger (C3HC4-type RING finger) family protein	AT5G25560	0.0007651	0.005171	603.703	80.9711	855.345	55.9136
262942_at	LEM3 (ligand-effect modulator 3) family protein / CDC50 family protein	AT1G79450	0.0007656	0.005172	31.8606	2.39396	54.7443	7.0173
249999_at	lipase class 3 family protein	AT5G18640	0.0007674	0.005182	650.557	6.38988	928.771	116.256
255688_at	DEAD/DEAH box helicase, putative	AT4G00660	0.0007686	0.005184	287.996	22.3298	436.414	15.7088
254126_at	31 kDa ribonucleoprotein, chloroplast, putative / RNA-binding protein RNP-T, putative / RNA-binding protein 1/2/3, putative / RNA-binding protein cp31, putative	AT4G24770	0.0007687	0.005184	722.011	61.0161	1005.31	38.8791
265412_at	chloroplast outer membrane protein, putative	AT2G16640	0.0007786	0.005237	435.448	83.3487	655.94	40.2349
265796_at	heavy-metal-associated domain-containing protein	AT2G35730	0.00078	0.005244	21.8694	3.06278	39.2182	8.91783
247580_at	rRNA processing protein-related	AT5G61330	0.0007805	0.005244	22.3992	1.49342	37.3333	1.26565
246500_at	Rad21/Rec8-like family protein	AT5G16270	0.0007833	0.005257	489.562	61.8413	737.462	72.246
261659_at	target of rapamycin protein (TOR)	AT1G50030	0.0007886	0.00529	86.4046	21.8715	145.123	10.2332
256285_at	expressed protein	AT3G12510	0.0007904	0.0053	336.414	30.2	527.49	50.2581
250009_at	hypothetical protein	AT5G18440	0.0007924	0.00531	56.1244	8.16784	96.5527	17.436
256607_at	expressed protein	AT3G32930	0.0007939	0.005317	15.8209	1.17763	26.0879	2.28061
257655_at	high mobility group (HMG1/2) family protein / ARID/BRIGHT DNA-binding domain-containing protein	AT3G13350	0.0008001	0.005352	86.4213	19.8113	148.566	16.9592
245109_at	DNAJ heat shock N-terminal domain-containing protein	AT2G41520	0.0008004	0.005352	25.9674	7.88929	44.1731	5.82051
263824_at	transducin family protein / WD-40 repeat family protein	AT2G40360	0.0008022	0.005359	226.738	51.221	351.053	17.7134
245178_at	expressed protein	AT5G12390	0.0008057	0.005377	214.246	7.76579	323.761	18.7838
262609_at	expressed protein	AT1G13930	0.0008068	0.005381	202.107	84.8824	347.79	72.4509
253839_at	nuclear movement family protein	AT4G27890	0.0008074	0.005382	7.95224	1.03049	11.606	1.42234
252394_at	DNAJ heat shock protein, putative	AT3G47940	0.0008099	0.005396	108.177	15.3	170.198	16.0336
255609_s_at	XH/XS domain-containing protein	AT4G01180 : AT5G59390	0.0008112	0.005398	35.5822	6.44027	61.956	11.9702
254502_at	ribulose-1,5 bisphosphate carboxylase/oxygenase large subunit N-methyltransferase-related	AT4G20130	0.0008113	0.005398	7.01941	0.736336	10.187	1.00704
246990_at	cucumisin-like serine protease (ARA12)	AT5G67360	0.0008115	0.005398	238.638	67.9865	382.375	17.7878
262941_at	pentatricopeptide (PPR) repeat-containing protein	AT1G79490	0.0008136	0.005409	21.4998	2.48875	37.0533	5.35781
266515_at	F-box family protein / tubby family protein	AT2G47900	0.0008185	0.00543	36.4759	3.06158	60.4128	9.14682
249552_s_at	serine/threonine protein kinase, putative	AT5G38240 : AT5G38250	0.0008199	0.005436	11.291	3.56324	18.5733	2.79071
248603_at	transducin family protein / WD-40 repeat family protein	AT5G49430	0.0008217	0.005442	18.2902	1.10457	30.4057	6.26195
266537_at	GCIP-interacting family protein	AT2G16860	0.0008224	0.005442	526.834	69.6331	768.04	11.2308
254050_s_at	expressed protein	AT4G25670 : AT4G25690	0.0008225	0.005442	1115.05	36.5765	1481.23	47.3379
257765_at	pentatricopeptide (PPR) repeat-containing protein	AT3G23020	0.0008238	0.005445	6.64194	0.446723	9.53621	0.621483
248583_at	zinc knuckle (CCHC-type) family protein	AT5G49930	0.0008264	0.005459	783.068	181.069	1128.35	68.2568
260317_at	ubiquitin-conjugating enzyme 5 (UBC5)	AT1G63800	0.0008274	0.005463	991.504	30.4935	1329.2	92.2435
249200_at	5'-3' exoribonuclease (XRN2)	AT5G42540	0.0008307	0.005482	48.1753	12.1128	86.9979	10.1718
252183_at	UDP-glucoronosyl/UDP-glucosyl transferase family protein	AT3G50740	0.000832	0.005486	333.845	63.2361	526.704	34.761
258884_at	threonine ammonia-lyase / threonine dehydratase / threonine deaminase (OMR1)	AT3G10050	0.0008472	0.005563	27.408	4.51725	44.0076	3.22758
257892_at	universal stress protein (USP) family protein	AT3G17020	0.0008479	0.005563	592.26	36.6027	818.089	47.834
249372_at	glucose-6-phosphate 1-dehydrogenase / G6PD (ACG12)	AT5G40760	0.0008511	0.005581	424.155	64.6685	632.959	49.6641
250237_at	expressed protein	AT5G13560	0.0008517	0.005583	334.582	26.8137	508.185	18.0336
267044_at	expressed protein	AT2G34357	0.0008537	0.005589	33.8724	4.54896	64.2893	17.4485
252479_at	mitochondrial import inner membrane translocase (TIM9)	AT3G46560	0.0008577	0.00561	358.162	9.92797	544.866	111.34
252845_at	vacuolar ATP synthase subunit H family protein	AT3G42050	0.0008592	0.005617	900.611	20.2678	1236.28	106.902
253456_at	neurochondrin family protein	AT4G32050	0.0008607	0.005624	16.3116	1.62943	26.4644	4.50181
250157_at	peroxidase, putative	AT5G15180	0.0008621	0.005626	7.05698	1.21381	10.6088	1.63161
258790_at	KH domain-containing protein	AT3G04610	0.0008621	0.005626	104.748	16.9092	174.78	22.369
265727_at	DNA topoisomerase family protein	AT2G32000	0.0008629	0.005626	114.742	18.6315	187.287	26.9979
253898_s_at	tryptophan synthase, beta subunit 2 (TSB2)	AT4G27070 : AT5G54810	0.0008653	0.005639	869.876	68.9182	1191.3	49.8016
264255_at	SF2/ASF-like splicing modulator (SRP30)	AT1G09140	0.0008662	0.005642	740.446	204.891	1111.6	118.024
264113_at	autophagy 9 (APG9)	AT2G31260	0.0008682	0.00565	407.699	114.49	634.052	38.5599
264999_at	calmodulin-binding protein	AT1G67310	0.0008745	0.005684	34.4261	8.37055	61.4835	8.32336
249589_at	pfkB-type carbohydrate kinase family protein	AT5G37850	0.0008835	0.00574	37.7886	6.43333	63.0323	2.76209
252179_at	glycosyl transferase family 8 protein	AT3G50760	0.0008969	0.005821	5.9531	0.281971	8.68328	1.7254
261126_at	TATA box-binding protein-associated factor (TAF) family protein	AT1G04950	0.0008976	0.005823	16.5322	4.21752	26.5872	1.78732
245694_at	calcium-binding EF hand family protein	AT5G04170	0.0008983	0.005823	305.88	35.9045	450.077	17.6332
258061_at	expressed protein	AT3G25910	0.0008985	0.005823	790.082	89.8262	1099.95	77.5403
261136_at	pfkB-type carbohydrate kinase family protein	AT1G19600	0.0009002	0.00583	40.1809	3.21228	68.7618	8.04704
251114_at	expressed protein	AT5G01380	0.0009078	0.005873	6.76183	0.951143	9.66301	0.18886
245387_at	nuclear RNA-binding protein, putative	AT4G17520	0.0009083	0.005874	80.5843	20.7579	132.955	9.16021
257859_at	auxin-responsive protein-related	AT3G12955	0.0009108	0.005887	736.741	80.1966	1045.7	116.601
265850_at	DNAJ heat shock N-terminal domain-containing protein	AT2G35720	0.0009122	0.005893	21.6666	2.14016	35.4154	2.64742
254269_at	protein kinase, putative	AT4G23050	0.0009128	0.005894	99.327	29.5572	175.505	34.7136
247852_at	SNARE protein-related	AT5G58060	0.0009157	0.005906	1927.4	33.2239	2553.43	128.368
264141_at	expressed protein	AT1G79090	0.0009165	0.005909	217.85	25.913	332.335	23.2153
254117_at	expressed protein	AT4G24750	0.0009203	0.005922	10.9306	0.245825	17.6248	4.05664
245051_at	WRKY family transcription factor	AT2G23320	0.0009205	0.005922	689.862	124.341	1018.38	99.1611
250028_at	expressed protein	AT5G18130	0.0009209	0.005922	2055.05	79.3046	2719.22	302.078
256380_at	S locus-linked protein, putative	AT1G66680	0.0009209	0.005922	215.152	41.7451	334.63	37.6154
264064_at	expressed protein	AT2G27900	0.0009237	0.005934	14.3323	3.82861	24.5057	3.2761
250621_at	rhomboid family protein	AT5G07250	0.0009238	0.005934	8.88336	0.56068	12.8136	0.78958
255279_at	thioredoxin family protein	AT4G04950	0.0009267	0.00595	259.782	35.5288	390.249	33.1546
257923_at	expressed protein	AT3G23160	0.0009308	0.005973	24.0488	5.5513	42.6295	8.7099
264663_at	leucine-rich repeat transmembrane protein kinase, putative	AT1G09970	0.0009348	0.005987	861.413	198.541	1246.89	141.342
251563_at	C2 domain-containing protein	AT3G57880	0.0009373	0.005999	173.969	42.6813	280.853	10.4421
248869_at	RNA recognition motif (RRM)-containing protein	AT5G46840	0.0009474	0.006052	375.914	55.5557	564.883	41.8873
252745_at	zinc finger (FYVE type) family protein	AT3G43230	0.0009493	0.006061	1132.95	80.3227	1513.86	105.22
249628_at	tropomyosin-related	AT5G37580	0.0009579	0.00611	14.7208	2.48195	26.0682	7.01424
254433_at	subtilase family protein	AT4G20850	0.000958	0.00611	2190.69	171.57	2927.53	228.826
266071_at	zinc finger (C3HC4-type RING finger) family protein	AT2G18670 : AT2G18680	0.0009614	0.006129	46.583	5.34346	89.5704	26.5823
264450_s_at	paired amphipathic helix repeat-containing protein	AT1G10250 : AT1G10450	0.0009653	0.00615	21.3524	10.2112	39.6739	8.90394
248100_at	glycosyl hydrolase family 17 protein	AT5G55180	0.0009698	0.006176	277.09	27.2359	455.332	122.407
265942_at	casein kinase, putative	AT2G19470	0.0009703	0.006176	31.9019	1.27619	53.2888	8.17536
253877_at	expressed protein	AT4G27435	0.0009786	0.006222	6.72929	1.1627	10.0387	1.07802
266341_at	pentatricopeptide (PPR) repeat-containing protein	AT2G01510	0.0009815	0.006235	8.17855	0.872571	11.705	0.421686
251536_at	ketol-acid reductoisomerase	AT3G58610	0.0009839	0.006247	821.63	19.2892	1151.13	175.101
251743_at	yippee family protein	AT3G55890	0.0009883	0.006265	44.2299	10.5351	88.0408	38.1633
247668_at	pseudo-response regulator 3 (APRR3)	AT5G60100	0.0009898	0.006272	137.648	26.8641	216.227	18.0636
253782_at	expressed protein	AT4G28590	0.001003	0.006347	8.98268	0.827242	13.0599	0.869587
250776_at	monooxygenase, putative (MO3)	AT5G05320	0.001005	0.006355	1006.4	200.931	1395.29	90.1593
260042_at	membrane protein, putative	AT1G68820	0.001008	0.006368	493.417	50.2842	731.921	92.4794
263356_at	UBP1 interacting protein 1a (UBA1a)	AT2G22090	0.001011	0.006385	338.632	19.5617	505.59	38.1339
251887_at	FKBP12 interacting protein (FIP37)	AT3G54170	0.001013	0.006394	260.945	20.0234	388.322	45.3763
250061_at	co-chaperone grpE family protein	AT5G17710	0.001016	0.006405	89.3574	8.30711	144.697	8.38812
258939_at	expressed protein	AT3G10020	0.001018	0.006412	5382.16	1195.5	7354.52	468.788
249938_at	TATA box-binding protein-interacting protein-related	AT5G22330	0.001022	0.006435	135.866	4.39574	206.046	18.972
265714_at	expressed protein	AT2G03520	0.001023	0.006435	1575.69	222.179	2162.95	60.3469
264746_at	WRKY family transcription factor	AT1G62300	0.001028	0.006459	84.2486	11.4184	133.983	11.0262
267095_at	AMP deaminase, putative / myoadenylate deaminase, putative	AT2G38280	0.001029	0.006459	59.1195	19.0105	102.68	7.87346
248826_at	casein kinase II beta chain, putative	AT5G47080	0.001034	0.006485	680.873	57.2383	944.851	11.1718
252335_at	expressed protein	AT3G48860	0.001034	0.006485	195.933	28.8209	306.804	20.2022
248398_at	sorbitol dehydrogenase, putative / L-iditol 2-dehydrogenase, putative	AT5G51970	0.001035	0.006487	1159.04	159.321	1554.38	35.5305
246755_at	F-box family protein	AT5G27920	0.001036	0.00649	78.3547	5.05201	126.789	20.8105
261238_at	expressed protein	AT1G32810	0.001045	0.00654	70.3672	10.0221	117.724	12.9067
260813_at	VirE2-interacting protein (VIP1)	AT1G43700	0.001047	0.006549	835.351	61.0228	1134.23	85.7254
253458_at	octicosapeptide/Phox/Bem1p (PB1) domain-containing protein / tetratricopeptide repeat (TPR)-containing protein	AT4G32070	0.001054	0.006586	114.711	13.7465	180.323	15.7452
258436_at	zinc finger (C3HC4-type RING finger) family protein	AT3G16720	0.001056	0.006593	9.02986	0.68672	13.7829	2.27395
261324_at	expressed protein	AT1G44770	0.001057	0.006597	971.712	94.199	1303.24	109.886
258904_at	DNA-dependent ATPase, putative	AT3G06400	0.00106	0.006611	1564.82	165.419	2112.09	71.3398
255009_at	KH domain-containing protein	AT4G10070	0.001062	0.006619	24.941	5.452	41.2034	2.19428
247269_at	alternative oxidase 2, mitochondrial (AOX2)	AT5G64210	0.001071	0.006665	30.6125	9.09026	53.2265	5.43482
263921_at	fructose-bisphosphate aldolase, putative	AT2G36460	0.001078	0.006705	478.533	61.897	693.911	33.6936
265614_at	exonuclease-related	AT2G25355	0.001081	0.006717	10.327	1.77824	15.6385	2.25061
263077_at	ribonuclease II family protein	AT2G17510	0.001083	0.006728	24.3588	4.80577	39.4705	2.03519
266074_at	small nuclear ribonucleoprotein E, putative / snRNP-E, putative / Sm protein E, putative	AT2G18740	0.001092	0.006778	97.999	6.09022	158.334	8.87797
254936_at	UBX domain-containing protein	AT4G10790	0.001098	0.006798	345.108	58.408	511.492	28.0419
246461_at	AAA-type ATPase family protein	AT5G16930	0.001107	0.006836	16.2705	2.68543	28.8986	8.79651
265672_at	cysteine proteinase inhibitor-related	AT2G31980	0.001107	0.006836	1371.48	84.2073	1841.31	255.547
246212_at	basic helix-loop-helix (bHLH) protein SPATULA (SPT)	AT4G36930	0.001119	0.006908	1044.42	31.1482	1371.19	57.1684
259696_at	pentatricopeptide (PPR) repeat-containing protein	AT1G63150	0.001124	0.006925	10.4113	1.30744	15.4373	1.07111
251066_at	zinc finger (C3HC4-type RING finger) family protein	AT5G01880	0.001127	0.006941	275.778	49.2335	420.586	34.9866
248266_at	expressed protein	AT5G53440	0.001129	0.006946	262.345	4.97978	402.459	70.4309
249219_at	SET domain-containing protein (TXR7)	AT5G42400	0.00113	0.006948	29.0246	3.30262	47.7703	5.77932
260231_at	zinc finger (C3HC4-type RING finger) family protein	AT1G74410	0.001135	0.006969	971.191	132.697	1301.26	27.3407
261725_at	small nuclear ribonucleoprotein D3, putative / snRNP core protein D3, putative / Sm protein D3, putative	AT1G76300	0.001135	0.006969	175.18	33.7562	279.537	29.0701
264977_at	glycine-rich protein	AT1G27090	0.001138	0.006984	146.37	38.5129	245.837	20.0443
253161_at	senescence-associated protein (SEN1)	AT4G35770	0.001144	0.007014	212.231	55.9122	338.833	62.9215
259217_at	MATE efflux family protein	AT3G03620	0.001145	0.007016	269.617	102.77	449.51	47.9508
266792_at	sucrose transporter / sucrose-proton symporter (SUC3)	AT2G02860	0.001154	0.007058	111.273	7.12009	173.681	14.5276
251446_at	expressed protein	AT3G59840	0.001161	0.00709	340.418	28.8515	514.743	67.9346
260746_at	glutathione S-transferase, putative	AT1G78380	0.001161	0.00709	6252.6	334.602	7858.39	280.77
267421_at	AICARFT/IMPCHase bienzyme family protein	AT2G35035 : AT2G35040	0.001162	0.007094	67.6411	8.36695	112.648	7.20466
266449_at	oxidoreductase, 2OG-Fe(II) oxygenase family protein	AT2G43080	0.001175	0.007159	332.005	40.9738	498.386	13.9537
265105_s_at	flavin-containing monooxygenase-related / FMO-related	AT1G62580 : AT1G63340	0.001177	0.007166	4.7255	0.317235	6.21916	0.37467
246653_at	epsin N-terminal homology (ENTH) domain-containing protein	AT5G35200	0.001179	0.007166	136.65	14.2862	209.834	7.67887
257444_at	ubiquitin-associated (UBA)/TS-N domain-containing protein	AT2G12550	0.00118	0.007172	111.196	22.1565	175.067	4.91485
261524_at	expressed protein	AT1G14300	0.001186	0.007196	222.855	29.4711	326.615	3.05949
264448_at	histidine kinase (AHK3)	AT1G27320	0.001187	0.007198	138.026	48.2007	243.85	37.5267
265961_at	chloroplast lumen common family protein	AT2G37400	0.001199	0.007261	73.938	4.03379	118.942	7.35576
251641_at	peptidase M16 family protein / insulinase family protein	AT3G57470	0.001204	0.007285	5.93729	0.904005	8.25823	0.966868
265630_at	OTU-like cysteine protease family protein	AT2G27350	0.001209	0.007309	240.529	47.3247	369.977	31.0975
264774_at	expressed protein	AT1G22890	0.001213	0.007331	6.42818	0.306065	11.5979	5.34218
262856_at	epsin N-terminal homology (ENTH) domain-containing protein	AT1G14910	0.001217	0.00735	21.9317	4.51884	36.3624	4.37074
259068_at	glycine-rich protein	AT3G07560	0.001238	0.007448	568.016	119.619	815.774	48.5457
259932_at	zinc finger (C2H2 type) family protein	AT1G34370	0.001241	0.007458	2519.31	155.514	3353.35	90.6523
246429_at	heavy-metal-associated domain-containing protein / copper chaperone (CCH)-related	AT5G17450	0.001245	0.007479	26.5521	8.04161	44.6397	5.78194
253659_at	expressed protein	AT4G30150	0.00125	0.007499	28.3953	11.0069	51.4516	11.3193
259225_at	small nuclear ribonucleoprotein D1, putative / snRNP core protein D1, putative / Sm protein D1, putative	AT3G07590	0.001251	0.007504	70.7298	11.9949	117.617	15.315
261109_at	FAD-binding domain-containing protein / cytokinin oxidase family protein	AT1G75450	0.001258	0.007536	338.413	33.9175	518.915	76.6071
250524_at	myb family transcription factor	AT5G08520	0.001267	0.007584	37.4051	10.2877	62.4172	3.33236
258963_at	expressed protein	AT3G10550	0.00127	0.007597	636.481	115.846	948.985	148.092
248005_at	expressed protein	AT5G56240	0.001282	0.007654	165.819	29.482	269.611	44.1726
266733_at	expressed protein	AT2G03280	0.001282	0.007655	164.708	24.3088	261.118	21.3879
246959_at	expressed protein	AT5G24690	0.001284	0.007662	45.0913	8.54326	79.3371	17.4484
255630_at	C2 domain-containing protein	AT4G00700	0.001287	0.007673	132.976	54.5235	254.835	69.6788
258187_at	tetratricoredoxin (TDX)	AT3G17880	0.001292	0.007689	94.8794	1.1577	150.618	19.4856
246020_at	expressed protein	AT5G10710	0.001315	0.007814	263.809	44.1843	385.642	22.8571
247912_at	AAA-type ATPase family protein	AT5G57480	0.001316	0.007816	34.8899	8.53527	60.1626	9.69451
245439_at	expressed protein	AT4G16670	0.001319	0.007823	101.294	17.8562	168.885	28.6553
246343_at	expressed protein	AT3G56720	0.001319	0.007823	505.827	69.3831	762.499	108.226
245180_at	THUMP domain-containing protein	AT5G12410	0.001324	0.007852	95.0223	12.3674	150.211	5.52963
254241_at	protein kinase family protein	AT4G23190	0.001332	0.007881	38.0706	12.0221	63.4872	4.49066
257369_at	expressed protein	AT2G35550	0.001332	0.007881	14.1908	1.50855	22.3859	0.797981
260837_at	fructose-1,6-bisphosphatase, putative / D-fructose-1,6-bisphosphate 1-phosphohydrolase, putative / FBPase, putative	AT1G43670	0.001332	0.007881	543.983	33.8308	768.967	124.233
263688_at	expressed protein	AT1G26920	0.001337	0.007908	1842.53	246.061	2477.42	25.4388
255833_at	expressed protein	AT2G33390	0.001341	0.007928	63.9461	11.4151	102.212	12.7714
252960_at	expressed protein	AT4G38750	0.001344	0.007932	15.3939	3.23558	26.542	6.47865
247168_at	ankyrin repeat family protein	AT5G65860	0.00135	0.007945	25.2307	3.37851	41.9471	9.19954
249092_at	glycoside hydrolase family 47 protein	AT5G43710	0.001361	0.008001	75.8942	16.4447	130.949	28.3967
245043_at	ania-6a type cyclin (RCY1)	AT2G26430	0.001363	0.008012	179.636	20.737	271.445	7.18332
264322_at	tetratricopeptide repeat (TPR)-containing protein	AT1G04190	0.001367	0.008029	45.3311	4.19916	80.262	17.5407
267081_at	phosphatidylinositol-4-phosphate 5-kinase family protein	AT2G41210	0.001376	0.008077	10.6082	1.49443	15.6062	0.983168
262119_s_at	glutathione S-transferase, putative	AT1G02920 : AT1G02930	0.001377	0.008077	264.484	144.239	620.659	383.827
253429_at	peptidyl-prolyl cis-trans isomerase cyclophilin-type family protein	AT4G32420	0.001381	0.008099	13.3827	1.82069	21.1126	2.83205
248234_at	haloacid dehalogenase-like hydrolase family protein	AT5G53850	0.001385	0.008114	416.622	9.60817	579.212	24.7014
248905_at	RNA recognition motif (RRM)-containing protein	AT5G46250	0.001386	0.008114	575.067	57.5386	788.189	46.529
244979_at	No description found		0.001388	0.008122	386.455	103.759	587.047	28.2086
247446_at	expressed protein	AT5G62650	0.001392	0.008135	151.245	16.8132	229.666	12.4991
258576_at	40S ribosomal protein S16 (RPS16B)	AT3G04230	0.001392	0.008135	14.5695	0.843941	22.6898	0.902307
257971_at	vesicle tethering family protein	AT3G27530	0.0014	0.008177	232.029	54.7137	357.695	7.39493
245216_at	importin alpha-2, putative (IMPA-2)	AT4G16143	0.001407	0.008211	60.9542	12.0719	100.877	13.2624
256264_at	expressed protein	AT3G12210	0.001411	0.008232	59.954	7.68904	95.4329	3.48911
245667_at	GRAM domain-containing protein / ABA-responsive protein-related	AT1G28200	0.001424	0.008289	1105.77	131.519	1440.69	49.7455
254445_at	3-hydroxyisobutyrate dehydrogenase, putative	AT4G20930	0.001428	0.008307	90.4904	8.00074	152.783	13.0627
260651_at	expressed protein	AT1G32460	0.001429	0.008309	1999.75	126.796	2564.56	90.9098
251553_at	WRKY family transcription factor	AT3G58710	0.001433	0.008329	36.4007	3.7263	57.0319	4.0638
264636_at	expressed protein	AT1G65490	0.001441	0.008361	12.5586	4.3776	19.6891	1.1006
246929_at	expressed protein	AT5G25210	0.001445	0.00838	13.3736	1.68835	20.5156	1.91685
254238_at	expressed protein	AT4G23540	0.001448	0.008392	24.6564	3.43527	40.9798	8.24215
254019_at	expressed protein	AT4G26190	0.001464	0.008474	7.42073	1.19669	10.8359	1.42243
245639_at	acidic ribosomal protein P0-related	AT1G25260	0.001465	0.008474	194.162	14.6597	291.832	6.56468
260677_at	expressed protein	AT1G07910	0.001475	0.008521	47.265	16.3584	85.2647	12.4044
251530_at	expressed protein	AT3G58520	0.001476	0.008521	5.6382	0.366748	7.41984	0.815566
253184_at	protein kinase family protein	AT4G35230	0.001476	0.008521	394.828	55.7697	568.539	39.6906
259876_at	DNAJ heat shock N-terminal domain-containing protein	AT1G76700	0.001488	0.008582	131.101	23.5963	215.111	12.074
248326_at	WD-40 repeat family protein / notchless protein, putative	AT5G52820	0.00149	0.008587	266.466	23.9772	387.445	12.9696
250232_at	expressed protein	AT5G13950	0.00149	0.008587	107.463	29.1203	180.208	35.866
265141_at	armadillo/beta-catenin repeat family protein	AT1G51350	0.001492	0.008594	28.6716	3.98025	46.5272	3.41454
262402_at	expressed protein	AT1G49410	0.001494	0.008601	135.757	7.3668	204.655	23.4949
266095_at	3-oxo-5-alpha-steroid 4-dehydrogenase, putative / steroid 5-alpha-reductase, putative	AT2G38050	0.001501	0.008633	48.5661	6.49756	82.724	10.2424
263686_at	60S ribosomal protein L10 (RPL10B)	AT1G26910	0.001506	0.008655	147.079	23.4058	253.484	74.6614
251856_at	glutamate carboxypeptidase, putative (AMP1)	AT3G54720	0.001511	0.008677	13.7122	1.47748	25.6644	9.37196
258926_s_at	no apical meristem (NAM) family protein	AT3G10480 : AT3G10490	0.001512	0.008677	263.711	54.8329	405.972	76.2843
247896_at	26S proteasome regulatory subunit, putative	AT5G57950	0.001515	0.008693	86.6327	12.897	135.358	8.60184
266463_at	tic20 protein-related	AT2G47840	0.001519	0.008708	76.6261	6.16393	118.159	5.67449
259118_at	expressed protein	AT3G01310	0.001521	0.008717	191.946	36.6941	279.469	6.63537
262900_at	paired amphipathic helix repeat-containing protein	AT1G59890	0.001526	0.008742	64.9543	19.1231	106.648	12.1076
258051_at	metallo-beta-lactamase family protein	AT3G16260	0.001527	0.008742	9.02653	1.46346	13.2924	1.58678
265324_at	cytidylyltransferase domain-containing protein	AT2G18250	0.001539	0.008803	159.348	16.0989	250.201	13.7318
262487_at	wound-responsive family protein	AT1G21610	0.001543	0.008822	30.4982	5.71427	52.5404	8.9516
247029_at	AP2 domain-containing transcription factor, putative	AT5G67190	0.001545	0.008828	154.626	31.9085	233.941	11.2405
266106_at	autophagy 8e (APG8e)	AT2G45170	0.001559	0.008898	2752.84	330.532	3579.09	169.982
246781_at	sugar-porter family protein 1 (SFP1)	AT5G27350	0.001567	0.008919	4569.24	228.206	5899.19	571.477
264218_at	splicing factor PWI domain-containing protein / RNA recognition motif (RRM)-containing protein	AT1G60200	0.001567	0.008919	118.729	33.863	190.62	17.6657
258641_at	expressed protein	AT3G08030	0.001581	0.008983	69.9608	15.2356	125.365	32.6174
258758_at	zinc finger (C3HC4-type RING finger) family protein	AT3G10810	0.001581	0.008983	101.251	5.89364	159.063	1.76382
248311_at	beta-carotene hydroxylase, putative	AT5G52570	0.001584	0.008996	528.904	47.5439	738.405	20.1524
263182_at	expressed protein	AT1G05575	0.001597	0.009055	6.44295	1.08266	9.15335	1.11088
250907_at	expressed protein	AT5G03670	0.001601	0.009073	83.8657	25.4526	139.058	11.4925
249483_at	zinc finger (C3HC4-type RING finger) family protein	AT5G38895	0.001603	0.009079	100.511	10.4459	159.701	17.0079
267293_at	senescence-associated family protein	AT2G23810	0.001612	0.009125	2577.27	259.565	3393.1	202.003
258315_at	thioesterase family protein	AT3G16175	0.001613	0.009125	35.1098	12.3284	60.7515	6.96885
257060_at	octicosapeptide/Phox/Bem1p (PB1) domain-containing protein	AT3G18230	0.001627	0.009188	120.682	30.7614	197.952	32.1795
267214_at	La domain-containing protein	AT2G43970	0.001627	0.009188	980.484	140.236	1307.16	68.6327
258809_at	no apical meristem (NAM) family protein	AT3G04070	0.001632	0.009213	165.116	35.7646	269.697	45.1727
266689_at	RNA-dependent RNA polymerase family protein	AT2G19930	0.001635	0.009222	775.743	65.0346	1048.37	61.147
265840_at	expressed protein	AT2G14530	0.001641	0.00925	58.9927	2.24356	95.0818	12.7262
256968_at	ATP-NAD kinase family protein	AT3G21070	0.001648	0.009281	28.302	5.05609	46.0399	7.0389
245316_at	expressed protein	AT4G14000	0.001649	0.009283	65.181	7.7312	102.818	10.5113
265960_at	histone H2B, putative	AT2G37470	0.001658	0.009323	179.386	25.9837	278.16	37.2134
264465_at	E3 ubiquitin ligase SCF complex subunit SKP1/ASK1 (At18), putative	AT1G10230	0.001661	0.009336	15.3824	1.00572	24.7051	3.35605
263179_at	ethylene-responsive protein, putative	AT1G05710	0.001663	0.009347	38.5486	5.08354	62.6747	1.41206
255127_at	nodulin MtN21 family protein	AT4G08300	0.001666	0.009356	29.728	7.98943	67.4879	34.6791
267314_at	myosin heavy chain-related	AT2G34730	0.001668	0.009367	234.404	32.4673	353.686	32.0148
254452_at	UV-damaged DNA-binding protein, putative	AT4G21100	0.00167	0.009373	28.4776	9.10102	47.5363	5.12039
259367_at	expressed protein	AT1G69070	0.001674	0.009389	30.9662	9.55077	53.7282	5.67559
258526_at	plastid developmental protein DAG, putative	AT3G06790	0.001675	0.009393	92.5035	4.21138	145.435	11.3174
246057_at	expressed protein	AT5G08400	0.001688	0.009459	40.9047	6.97303	69.2718	8.31674
264548_at	WD-40 repeat family protein	AT1G55675 : AT1G55680	0.001694	0.009475	588.119	95.2216	802.431	39.6864
265470_at	zinc finger (C3HC4-type RING finger) family protein	AT2G37150	0.001694	0.009475	51.1154	5.69684	84.0926	2.71188
253421_at	expressed protein	AT4G32340	0.001708	0.009545	21.2089	3.69968	37.3914	10.8536
253776_at	ADP, ATP carrier protein, mitochondrial, putative / ADP/ATP translocase, putative / adenine nucleotide translocator, putative	AT4G28390	0.001713	0.009566	436.529	62.8323	613.274	22.7072
252392_s_at	ubiquitin carboxyl-terminal hydrolase family protein	AT3G47890 : AT3G47900 : AT3G47910	0.001728	0.009628	101.086	24.428	165.28	9.69619
248165_at	universal stress protein (USP) family protein	AT5G54430	0.001734	0.00966	192.781	16.7997	282.99	8.53323
256479_at	tetratricopeptide repeat (TPR)-containing protein	AT1G33400	0.001745	0.00971	47.473	11.7286	79.6157	2.94272
248601_at	zinc knuckle (CCHC-type) family protein	AT5G49400	0.001752	0.009731	75.9316	3.01616	118.569	11.486
266916_at	expressed protein	AT2G45860	0.001752	0.009731	106.714	40.9481	177.503	26.7814
252319_at	expressed protein	AT3G48710	0.001766	0.009781	100.289	27.5666	164.811	9.05366
261383_at	PHD finger transcription factor, putative	AT1G05380	0.001779	0.009845	600.69	146.487	850.526	68.3691
258152_at	chaperonin, putative	AT3G18190	0.001795	0.009919	117.291	11.8685	181.478	22.0725
255465_at	mitochondrial transcription termination factor family protein / mTERF family protein	AT4G02990	0.001799	0.009932	13.385	0.326612	19.9183	2.25323
266501_at	HUA enhancer 2 (HEN2) / DExH-box RNA helicase, putative	AT2G06990	0.001799	0.009932	76.2186	17.0223	122.16	9.08409
264212_at	tRNA-nucleotidyltransferase, putative / tRNA adenylyltransferase, putative	AT1G22660	0.001809	0.009975	10.6188	1.58579	15.249	0.19009

## Sheet: Overlap_rdo2-1 hub1-2 DOWN
Overlap in differentially downregulated genes between rdo2-1 and hub1-2
See manuscript text for details
Affymetrix
probe identifier	Gene anotation	AGI code
267389_at	glycosyl hydrolase family 1 protein	AT2G44460
266022_at	subtilase family protein	AT2G05920
265954_at	WRKY family transcription factor (TTG2)	AT2G37260
265658_at	aminotransferase class I and II family protein	AT2G13810
265567_at	pseudogene, glycine-rich protein	AT2G05580
265471_at	peroxidase 21 (PER21) (P21) (PRXR5)	AT2G37130
265416_at	DNA-binding S1FA family protein	AT2G37120
265042_at	acid phosphatase class B family protein	AT1G04040
264835_at	secretory carrier membrane protein (SCAMP) family protein	AT1G03550
264777_at	L-allo-threonine aldolase-related	AT1G08630
264078_at	beta-galactosidase, putative / lactase, putative	AT2G28470
263909_at	HhH-GPD base excision DNA repair family protein (ROS1)	AT2G36490
263829_at	expressed protein	AT2G40435
263431_at	lipid-associated family protein	AT2G22170
263407_at	bZIP transcription factor family protein	AT2G04038
263391_at	1,2-diacylglycerol 3-beta-galactosyltransferase, putative / monogalactosyldiacylglycerol synthase, putative / MGDG synthase, putative	AT2G11810
263123_at	pentacyclic triterpene synthase, putative	AT1G78500
262745_at	lipase, putative	AT1G28600
262589_s_at	MATE efflux family protein	AT1G15150 : AT1G15160
261991_at	expressed protein	AT1G33700
261845_at	cinnamoyl-CoA reductase, putative	AT1G15960
261421_at	calmodulin-binding family protein	AT1G18840
261354_at	MutT/nudix family protein	AT1G79690
261032_at	hydrolase, alpha/beta fold family protein	AT1G17430
260812_at	integral membrane family protein / nodulin MtN21-related	AT1G43650
260496_at	ABC transporter family protein	AT2G41700
260412_at	alpha-amylase, putative / 1,4-alpha-D-glucan glucanohydrolase, putative	AT1G69830
259918_at	ovule development protein, putative	AT1G72570
259736_at	endo-1,4-beta-glucanase, putative / cellulase, putative	AT1G64390
259730_at	MORN (Membrane Occupation and Recognition Nexus) repeat-containing protein /phosphatidylinositol-4-phosphate 5-kinase-related	AT1G77660
259385_at	expressed protein	AT1G13470
258485_at	acyl-(acyl-carrier-protein) desaturase, putative / stearoyl-ACP desaturase, putative	AT3G02630
258456_at	protein kinase family protein	AT3G22420
256994_s_at	myrcene/ocimene synthase, putative	AT3G25820 : AT3G25830
256008_s_at	alliinase family protein	AT1G34040 : AT1G34060
255645_at	auxin-responsive family protein	AT4G00880
255527_at	expressed protein	AT4G02360
255094_at	zinc finger (C3HC4-type RING finger) family protein	AT4G08590
254564_at	9-cis-epoxycarotenoid dioxygenase, putative / neoxanthin cleavage enzyme, putative / carotenoid cleavage dioxygenase, putative	AT4G19170
254572_at	alcohol oxidase-related	AT4G19380
254500_at	vacuolar sorting receptor, putative	AT4G20110
254283_s_at	leucoanthocyanidin dioxygenase, putative / anthocyanidin synthase, putative	AT4G22870 : AT4G22880
254153_at	starch excess protein-related	AT4G24450
253907_at	dihydroflavonol 4-reductase family / dihydrokaempferol 4-reductase family	AT4G27250
253864_at	CBS domain-containing protein	AT4G27460
253401_at	expressed protein	AT4G32870
253241_at	fatty acid elongase 1 (FAE1)	AT4G34520
253090_at	beta-galactosidase, putative / lactase, putative	AT4G36360
252168_at	hydrolase, alpha/beta fold family protein	AT3G50440
252123_at	naringenin 3-dioxygenase / flavanone 3-hydroxylase (F3H)	AT3G51240
251984_at	phenylalanine ammonia-lyase 2 (PAL2)	AT3G53260
251402_at	oxidoreductase, 2OG-Fe(II) oxygenase family protein	AT3G60290
251382_at	pectinesterase family protein	AT3G60730
250859_at	cytochrome P450, putative	AT5G04660
250661_at	aspartyl protease family protein	AT5G07030
250558_at	flavonoid 3'-monooxygenase / flavonoid 3'-hydroxylase (F3'H) / cytochrome P450 75B1 (CYP75B1) / transparent testa 7 protein (TT7)	AT5G07990
250438_at	expressed protein	AT5G10580
250207_at	chalcone synthase / naringenin-chalcone synthase	AT5G13930
250083_at	glutathione S-transferase, putative	AT5G17220
249791_at	amino acid transporter family protein	AT5G23810
249215_at	dihydroflavonol 4-reductase (dihydrokaempferol 4-reductase) (DFR)	AT5G42800
248911_at	expressed protein	AT5G45830
248510_at	Mutator-like transposase family
248213_at	expressed protein	AT5G53660
248185_at	glycosyltransferase family protein	AT5G54060
247956_at	FAD-binding domain-containing protein / cytokinin oxidase family protein	AT5G56970
247640_at	F-box family protein	AT5G60610
246810_at	No description found
246273_at	cupin family protein	AT4G36700
246216_at	cytochrome P450 90C1 (CYP90C1) / rotundifolia3 (ROT3)	AT4G36380
245891_at	amino acid permease 2 (AAP2)	AT5G09220
245703_at	S-adenosyl-L-methionine:carboxyl methyltransferase family protein	AT5G04380
245634_at	nodulin MtN21 family protein	AT1G25270
245624_at	UDP-glucoronosyl/UDP-glucosyl transferase family protein	AT4G14090
245353_at	expressed protein	AT4G16000

## Sheet: Overlap_rdo2-1 hub1-2 UP
Overlap in differentially upregulated genes between rdo2-1 and hub1-2
See manuscript text for details
Affymetrix
probe identifier	Gene anotation	AGI code
266965_at	nodulin MtN21 family protein	AT2G39510
266884_at	uclacyanin II	AT2G44790
266393_at	glycine-rich protein / late embryogenesis abundant protein (M17)	AT2G41260
266364_at	expressed protein	AT2G41230
265945_at	FAD-binding domain-containing protein / cytokinin oxidase family protein	AT2G19500
265482_at	glycine-rich protein	AT2G15780
265111_at	protease inhibitor/seed storage/lipid transfer protein (LTP) family protein	AT1G62510
264636_at	expressed protein	AT1G65490
264554_at	cinnamyl-alcohol dehydrogenase family / CAD family	AT1G09510
264299_s_at	curculin-like (mannose-binding) lectin family protein	AT1G78850 : AT1G78860
264148_at	no apical meristem (NAM) family protein	AT1G02220
263073_at	auxin efflux carrier family protein	AT2G17500
262838_at	major latex protein-related / MLP-related	AT1G14960
262603_at	lactoylglutathione lyase family protein / glyoxalase I family protein	AT1G15380
261923_at	UDP-glucoronosyl/UDP-glucosyl transferase family protein	AT1G22380
261159_s_at	cyclin, putative	AT1G34460 : AT5G06150
260651_at	expressed protein	AT1G32460
260101_at	trypsin and protease inhibitor family protein / Kunitz family protein	AT1G73260
259947_at	protein kinase family protein	AT1G71530
259620_s_at	No description found
259520_at	expressed protein	AT1G12320
258631_at	polygalacturonase, putative / pectinase, putative	AT3G07970
257853_at	expressed protein	AT3G12960
257670_at	expressed protein	AT3G20340
256522_at	U-box domain-containing protein	AT1G66160
256349_at	late embryogenesis abundant protein-related / LEA protein-related	AT1G54890
256166_at	hypothetical protein	AT1G36920
254063_at	protein kinase family protein	AT4G25390
253908_at	auxin-responsive GH3 family protein	AT4G27260
253877_at	expressed protein	AT4G27435
253725_at	profilin 3 (PRO3) (PFN3)	AT4G29340
250798_at	peroxidase, putative	AT5G05340
250646_at	peroxidase, putative	AT5G06720
250252_at	transporter-related	AT5G13750
249377_at	expressed protein	AT5G40690
248563_at	UDP-glucoronosyl/UDP-glucosyl transferase family protein	AT5G49690
248163_at	auxin-responsive GH3 protein, putative (DFL-1)	AT5G54510
247327_at	peroxidase, putative	AT5G64120
247279_at	arabinogalactan-protein (AGP1)	AT5G64310
247177_at	expressed protein	AT5G65300
247049_at	expressed protein	AT5G66440
246429_at	heavy-metal-associated domain-containing protein / copper chaperone (CCH)-related	AT5G17450
246246_at	pentatricopeptide (PPR) repeat-containing protein	AT4G37170
246030_at	L-ascorbate oxidase, putative	AT5G21105
245151_at	pectinesterase family protein	AT2G47550
257517_at	expressed protein	AT3G16330
